# Supplementary material
Source: Research Square preprint supplement (doi:10.21203/rs.3.rs-8966334/v1)
Supplement: Supplementary file 2 [file 789e091973ed26ea49406675.xlsx]

## Sheet: Panel A
		Theoretical Concentration (µM)			Calculated Concentration (µM)							Accuracy (%)								ID#122541	ID#122542	ID#122543	ID#122544	ID#122545	ID#122546	ID#122547	ID#122548	ID#122549	ID#122550	ID#122551	ID#122552	ID#122553	ID#122554	ID#122555	ID#122556	ID#122557	ID#122558	ID#122559	ID#122560	ID#122561	ID#122562	ID#122563	ID#122564	ID#122565	ID#122566	ID#122567	ID#122568	ID#122570	ID#122571
Measure Name	HMBD ID	QC-1	QC-2	QC-3	QC-1[1]	QC-2[1]	QC-3[1]	QC-2[1]-QC_2	QC-2[1]-QC_2	QC-2[1]-QC_2	QC-2[1]-QC_2	QC-1[1]	QC-2[1]	QC-3[1]	QC-2[1]-QC_2	QC-2[1]-QC_2	QC-2[1]-QC_2	QC-2[1]-QC_2	LOD	Exp_DBS_0_1_1	Exp_DBS_0_2_1	Exp_DBS_0_3_1	Exp_DBS_pool_1_1	Exp_5_A_1	Exp_2_F_1	Exp_9_F_1	Exp_11_F_1	Exp_8_A_1	Exp_2_A_1	Exp_11_A_1	Exp_9_A_1	Exp_3_F_1	Exp_4_F_1	Exp_5_F_1	Exp_DBS_pool_2_1	Exp_3_A_1	Exp_6_A_1	Exp_1_F_1	Exp_7_F_1	Exp_10_F_1	Exp_7_A_1	Exp_6_F_1	Exp_1_A_1	Exp_4_A_1	Exp_10_A_1	Exp_8_F_1	Exp_DBS_pool_3_1	Exp_Serum_pool_1_1	Exp_7_SF_1
1,3-Diaminopropane	HMDB0000002	0.675	2.7	5.4	0.545634	2.03967	5.93102	2.18621	2.32367	1.94821	1.86265	80.8346	75.5432	109.834	80.9708	86.0618	72.1558	68.987	0.0277778	< LOD	0.032835	0.0368995	0.0284826	< LOD	< LOD	0.0342466	< LOD	0.0281991	0.0337276	0.0302742	< LOD	< LOD	< LOD	0.0385369	< LOD	< LOD	< LOD	0.0555003	0.0321985	< LOD	< LOD	< LOD	0.0382985	< LOD	< LOD	< LOD	0.0350923	< LOD	0.0327445
1-Methylnicotinamide	HMDB0000699	0.675	2.7	5.4	0.495594	1.72719	5.58211	1.80578	2.27079	1.73818	1.53121	73.4213	63.9702	103.372	66.8806	84.1033	64.377	56.7115	0.125	< LOD	< LOD	< LOD	< LOD	< LOD	< LOD	0.182105	< LOD	< LOD	0.127575	< LOD	0.184646	< LOD	< LOD	< LOD	< LOD	< LOD	< LOD	< LOD	< LOD	< LOD	< LOD	< LOD	< LOD	< LOD	< LOD	< LOD	< LOD	< LOD	< LOD
3-Methoxytyramine	HMDB0000022	0.7	2.8	5.6	0.593028	2.25493	6.28479	2.40195	2.38556	2.04431	2.06889	84.7183	80.5334	112.228	85.784	85.1986	73.011	73.8891	0.00618557	< LOD	< LOD	< LOD	< LOD	< LOD	< LOD	< LOD	0.0280201	< LOD	< LOD	< LOD	< LOD	< LOD	< LOD	< LOD	< LOD	< LOD	< LOD	< LOD	< LOD	< LOD	< LOD	< LOD	< LOD	< LOD	< LOD	< LOD	< LOD	< LOD	< LOD
5-Methoxytryptamine	HMDB0004095	0.7	2.8	5.6	0.639707	2.51847	6.40041	2.3319	2.23765	2.07537	1.93776	91.3867	89.9452	114.293	83.2822	79.9162	74.1202	69.2056	0.0135747	< LOD	< LOD	< LOD	< LOD	< LOD	< LOD	< LOD	< LOD	< LOD	< LOD	< LOD	< LOD	< LOD	< LOD	< LOD	< LOD	< LOD	< LOD	< LOD	< LOD	< LOD	< LOD	< LOD	< LOD	< LOD	< LOD	< LOD	< LOD	< LOD	< LOD
5-Methyluridine	HMDB0000884	0.4	1.6	3.2	< LOD	< LOD	< LOD	< LOD	< LOD	< LOD	< LOD	-248.599	-108.584	-79.356	-60.145	-66.9646	-72.8221	-97.9845	0.075	< LOD	< LOD	< LOD	< LOD	< LOD	< LOD	< LOD	< LOD	< LOD	< LOD	< LOD	< LOD	< LOD	< LOD	< LOD	< LOD	< LOD	< LOD	< LOD	< LOD	< LOD	< LOD	< LOD	< LOD	< LOD	< LOD	< LOD	< LOD	< LOD	< LOD
7-Methylguanine	HMDB0000897	0.1125	0.45	0.9	< LOD	< LOD	< LOD	< LOD	< LOD	< LOD	< LOD	-133.15	-73.332	-67.5566	-31.5801	-41.5103	-53.0548	-37.053	0.0708	< LOD	< LOD	< LOD	< LOD	< LOD	< LOD	< LOD	< LOD	< LOD	< LOD	< LOD	< LOD	< LOD	< LOD	< LOD	< LOD	< LOD	< LOD	< LOD	< LOD	< LOD	< LOD	< LOD	< LOD	< LOD	< LOD	< LOD	< LOD	< LOD	< LOD
Adenine	HMDB0000034	0.45	1.8	3.6	0.321739	1.4113	2.81543	1.10158	1.25972	1.32452	1.2564	71.4975	78.4054	78.2064	61.1991	69.9843	73.5846	69.8002	0.012	< LOD	< LOD	< LOD	< LOD	0.0603608	< LOD	0.0605379	< LOD	0.0250485	0.0429771	0.0664378	0.043168	0.0205857	0.0317631	0.0254452	< LOD	< LOD	0.112263	0.0526252	0.0377579	0.0189451	< LOD	< LOD	0.0170065	< LOD	0.0306096	0.0511326	< LOD	0.219593	0.127688
Adenosine	HMDB0000050	0.675	2.7	5.4	0.455666	2.02579	5.37793	2.04251	2.45664	2.10938	2.18993	67.5061	75.0294	99.5913	75.6484	90.9868	78.1253	81.1084	0.00382003	0.0289264	0.0266139	0.0646012	0.0380882	0.317086	0.13256	0.268291	0.117077	0.127205	0.105349	0.298462	0.367139	0.35206	0.158093	0.13981	0.0349357	0.0857193	0.178128	0.44715	0.316515	0.140686	0.121424	0.104224	0.156122	0.0554573	0.158774	0.427116	0.050862	0.0662806	0.0606526
Agmatine	HMDB0001432	0.8	3.2	6.4	0.751615	2.9006	6.81162	2.78245	2.913	2.89406	2.78626	93.9519	90.6437	106.432	86.9517	91.0311	90.4392	87.0705	0.00552486	< LOD	< LOD	< LOD	0.0501653	0.019723	0.0134839	0.0137544	0.0350675	0.00843273	0.0119727	0.00604238	0.0056905	< LOD	< LOD	< LOD	< LOD	< LOD	< LOD	< LOD	< LOD	< LOD	0.00561502	< LOD	< LOD	< LOD	< LOD	< LOD	< LOD	0.0337953	0.0225881
Alanine	HMDB0000161	120	480	960	106.658	382.941	1007.75	399.163	429.481	377.857	369.472	88.8818	79.7793	104.974	83.1589	89.4752	78.7201	76.9734	0.176005	< LOD	< LOD	< LOD	4.98872	84.3267	68.6601	79.9368	79.1714	98.6541	92.3167	78.4588	76.243	125.713	102.033	66.2131	4.9756	102.867	103.1	58.7129	118.899	85.7171	105.235	57.7399	127.027	30.4776	104.348	106.721	4.05639	403.734	495.447
Allantoin	HMDB0000462	2.4	9.6	19.2	1.56921	6.74432	18.2471	7.08284	7.83002	6.83191	6.69683	65.3838	70.2534	95.0368	73.7796	81.5627	71.1658	69.7586	0.409	< LOD	< LOD	< LOD	< LOD	0.843189	0.907318	7.34976	0.418	0.628717	0.919547	0.878963	0.818228	0.830108	1.43594	0.79195	< LOD	0.696327	1.03753	0.637148	1.58755	1.11009	0.77284	0.532299	0.634682	< LOD	0.909228	0.647404	< LOD	1.89194	2.99731
alpha-Aminoadipic acid	HMDB0000510	7	28	56	5.34922	19.4749	69.1748	25.3258	26.2254	23.8622	21.4174	76.4174	69.5532	123.526	90.4491	93.662	85.2222	76.4909	0.075	< LOD	< LOD	< LOD	< LOD	< LOD	< LOD	< LOD	0.175084	0.144572	< LOD	< LOD	< LOD	< LOD	< LOD	< LOD	< LOD	< LOD	< LOD	< LOD	< LOD	0.170947	< LOD	< LOD	< LOD	< LOD	0.116359	< LOD	< LOD	1.40207	1.27089
alpha-Aminobutyric acid	HMDB0000452	14	56	112	11.3163	44.3769	122.154	45.0553	50.9049	47.7315	45.2007	80.8309	79.2445	109.066	80.456	90.9016	85.2347	80.7155	0.0208696	< LOD	< LOD	< LOD	0.0422485	3.54707	1.58922	2.35574	3.89735	4.1034	1.24111	4.48637	2.25102	5.22007	4.75318	3.46925	0.0380239	2.36436	1.50643	1.74378	4.18006	1.53854	2.99922	1.90531	3.04212	1.16458	2.55998	3.19475	0.0684848	14.5373	17.927
Arginine	HMDB0000517	35	140	280	30.5404	114.975	305.999	125.297	125.784	113.289	102.916	87.2584	82.1251	109.285	89.4981	89.8457	80.9209	73.5113	0.137112	0.198758	0.140855	0.177199	0.321557	6.63572	7.81167	8.13621	9.22222	12.807	9.65055	9.45494	8.02543	15.9483	11.226	9.7316	0.311917	11.6213	8.88261	5.29073	11.9158	7.93448	10.5826	13.292	12.6024	4.92497	12.7314	10.7873	0.371046	113.582	94.5679
Asparagine	HMDB0000168	35	140	280	28.0935	115.348	297.891	114.925	123.72	101.224	103.13	80.2671	82.3917	106.389	82.0896	88.3714	72.3025	73.6645	0.101971	2.19481	1.31087	1.83167	1.30944	15.0858	13.2921	15.3673	14.2034	13.9893	15.7445	14.8718	11.5775	18.8269	17.1671	12.0572	1.63585	15.2216	16.3066	11.8623	17.0962	14.3569	13.7347	10.7574	16.975	5.3273	15.6082	13.0179	1.80735	37.6455	33.3439
Aspartic acid	HMDB0000191	45	180	360	36.9769	121.702	409.291	164.866	161.601	131.683	121.498	82.1709	67.6125	113.692	91.5922	89.7784	73.1572	67.4989	0.30303	1.31169	1.2988	1.2731	1.94325	26.8029	24.6427	30.0249	49.1034	36.0334	28.7982	33.2428	31.191	65.2807	18.3528	33.0352	1.37688	23.8817	38.4589	26.0754	39.4394	39.1149	35.9308	22.8832	43.8411	7.06222	76.6062	29.7467	2.53254	15.9603	15.9101
Asymmetric dimethylarginine	HMDB0001539	1.75	7	14	1.63158	6.32441	15.4894	5.63735	6.56485	5.77707	6.16864	93.2331	90.3487	110.638	80.5336	93.7835	82.5296	88.1235	0.0348837	0.125714	0.111183	0.729683	0.0820557	< LOD	0.11631	< LOD	0.709476	0.46537	0.231491	0.467899	0.300181	0.940129	0.46907	0.490466	< LOD	0.388155	0.179982	0.400498	0.213514	< LOD	0.293721	0.429825	0.507202	0.135043	0.105998	< LOD	0.0664393	0.337609	0.573411
Asymmetric dimethylarginine + Symmetric dimethylarginine	HMDB0001539 HMDB0003334	1.75	7	14	1.72762	6.92399	15.124	6.66674	6.87023	6.23322	5.85268	98.7213	98.9141	108.028	95.2392	98.1461	89.046	83.6098	0.00898	< LOD	< LOD	< LOD	< LOD	0.148225	0.120086	0.266151	0.118766	0.372802	0.174823	0.16199	0.156923	0.166591	0.16636	0.0846861	< LOD	0.144292	0.216232	0.116321	0.240289	0.242716	0.151562	0.0605035	0.359127	< LOD	0.341363	0.176603	< LOD	1.66325	1.80103
beta-Alanine	HMDB0000056	7	28	56	6.11023	23.298	59.6445	17.5477	16.5253	13.489	11.2189	87.289	83.2073	106.508	62.6703	59.019	48.1751	40.0673	0.0422535	< LOD	< LOD	< LOD	< LOD	0.673233	0.63923	0.925111	0.39079	0.894573	0.963381	0.694313	0.535552	1.11397	0.597863	0.627706	< LOD	0.759448	1.26613	0.38186	0.964002	0.319546	0.514625	0.570028	0.793608	0.129462	0.528196	0.6102	< LOD	1.33497	1.34343
Betaine	HMDB0000043	35	140	280	< LOD	< LOD	116.723	< LOD	< LOD	< LOD	< LOD	0	0	41.6867	0	0	0	0	0.480769	< LOD	< LOD	< LOD	< LOD	< LOD	< LOD	< LOD	< LOD	< LOD	< LOD	< LOD	< LOD	< LOD	< LOD	< LOD	< LOD	< LOD	< LOD	< LOD	< LOD	< LOD	< LOD	< LOD	< LOD	< LOD	< LOD	< LOD	< LOD	< LOD	< LOD
Cadaverine	HMDB0002322	0.84375	3.375	6.75	0.906277	2.84079	6.32969	2.70984	3.12484	3.1701	3.12648	107.411	84.1716	93.7732	80.2916	92.588	93.9289	92.6364	0.0112	0.0125661	0.0249899	< LOD	0.0182259	0.0338811	0.0918516	0.0293254	0.236709	0.0164192	0.0310898	0.0680487	< LOD	< LOD	0.0130656	< LOD	< LOD	0.0116678	0.0216698	0.038547	0.0398746	0.0570627	< LOD	0.0230543	< LOD	0.0587172	0.500556	< LOD	0.0169334	0.0326632	0.0326273
Carnosine	HMDB0000033	3.5	14	28	2.94035	12.8881	32.0097	13.6922	14.8275	12.6255	12.8353	84.01	92.058	114.32	97.8012	105.911	90.1824	91.6807	0.0155	< LOD	< LOD	< LOD	< LOD	< LOD	< LOD	< LOD	< LOD	< LOD	< LOD	< LOD	< LOD	< LOD	< LOD	< LOD	< LOD	< LOD	< LOD	< LOD	< LOD	< LOD	< LOD	< LOD	< LOD	< LOD	0.0723289	< LOD	< LOD	< LOD	< LOD
Choline	HMDB0000097	16.8	67.2	134.4	14.2868	54.656	187.981	60.6387	81.1764	60.7294	39.3456	85.0406	81.3334	139.867	90.2361	120.798	90.3711	58.5499	0.177778	1.31779	1.46363	3.15496	2.61918	10.5392	6.6594	16.6664	3.14323	4.5002	11.7388	9.96885	8.209	7.83078	6.2746	8.33052	2.38413	5.20797	8.19368	7.68666	13.3956	8.88013	5.09934	3.32079	7.32468	2.60428	5.465	8.10628	4.86818	10.1919	14.2049
cis-4-Hydroxyproline	HMDB0240251	7	28	56	6.21447	25.7969	59.0789	24.6936	26.3406	24.9372	24.6362	88.7782	92.1317	105.498	88.1914	94.0736	89.0615	87.9865	0.0124378	< LOD	< LOD	< LOD	< LOD	1.76183	1.50779	< LOD	0.0275997	1.75527	2.10271	< LOD	2.05666	4.05397	5.69639	< LOD	< LOD	< LOD	< LOD	0.992653	< LOD	1.93767	< LOD	2.8875	< LOD	2.02798	< LOD	2.8001	0.24397	12.5769	14.5135
Citrulline	HMDB0000904	35	140	280	32.9739	124.868	326.571	129.217	128.076	114.651	99.9765	94.2111	89.1915	116.632	92.2979	91.4826	81.8939	71.4118	0.0755668	< LOD	< LOD	< LOD	< LOD	6.2345	10.5655	9.29478	6.64264	5.31503	9.30783	6.01805	5.98837	15.261	5.32885	5.76069	< LOD	7.27515	10.4693	6.58451	12.948	12.0208	8.52762	10.1955	10.4753	1.74106	12.9173	6.59544	< LOD	38.5	62.4974
Creatine	HMDB0000064	17.5	70	140	14.5795	57.4146	146.92	60.3921	62.9625	62.2159	56.0823	83.3116	82.0209	104.943	86.2745	89.9464	88.8798	80.1175	0.213068	< LOD	< LOD	< LOD	2.68837	35.6614	26.8033	39.2597	20.2886	38.1013	36.6611	32.4095	27.6646	35.2522	27.4851	30.5267	2.68946	36.8526	32.3804	20.8637	43.0494	35.8632	25.4745	24.121	37.349	7.23974	35.3592	33.3562	2.57877	13.7171	16.7967
Creatinine	HMDB0000562	70	280	560	58.5076	234.285	620.234	229.459	259.378	232.272	217.481	83.5823	83.673	110.756	81.9496	92.6351	82.9544	77.6717	0.326797	< LOD	< LOD	< LOD	0.778527	21.378	15.2758	18.942	14.6507	25.1894	16.6828	19.7904	17.2043	17.6655	17.8844	17.1162	0.71786	13.8977	19.4081	11.325	19.4575	21.5304	17.2703	11.0237	18.1451	4.60499	21.9218	19.4583	0.54283	81.4662	92.5835
Cystathionine	HMDB0000099	7	28	56	6.21742	23.19	59.4976	22.4468	23.1606	22.43	21.7072	88.8203	82.8214	106.246	80.1672	82.7166	80.1073	77.5258	0.0518	0.0928444	0.0986493	0.108255	0.099224	0.111556	0.109632	0.138447	0.150958	0.10288	0.102852	0.122883	0.0932653	0.141542	0.111091	0.128135	0.0869334	0.100293	0.128775	0.100302	0.0844845	0.102594	0.124304	0.114685	0.105719	0.0917457	0.107713	0.132176	0.104255	0.20637	0.231837
Cytidine	HMDB0000089	1.75	7	14	1.57195	5.37051	15.7017	5.71458	6.48385	5.36297	5.81753	89.8257	76.7216	112.155	81.6368	92.6264	76.6138	83.1075	0.0360577	< LOD	< LOD	< LOD	< LOD	< LOD	< LOD	< LOD	1.48605	< LOD	< LOD	< LOD	< LOD	< LOD	< LOD	< LOD	< LOD	< LOD	< LOD	< LOD	< LOD	< LOD	< LOD	< LOD	< LOD	< LOD	< LOD	< LOD	< LOD	< LOD	< LOD
Cytosine	HMDB0000630	1.75	7	14	0.854518	5.85506	14.5882	4.35009	5.21259	5.65118	6.20765	48.8296	83.6437	104.201	62.1441	74.4656	80.7312	88.6807	0.0635593	0.2406	0.216138	0.212464	0.233717	0.169985	0.268979	0.171903	0.233306	0.222893	0.322598	0.198791	0.155265	0.215767	0.209736	0.170371	0.220815	0.17779	0.163923	0.182701	0.297818	0.216345	0.31493	0.248009	0.165403	0.191766	0.18808	0.16621	0.181425	0.22614	0.239868
Deoxyadenosine	HMDB0000101	1	4	8	0.741802	3.22732	7.19431	2.97145	3.34712	3.461	3.34157	74.1802	80.683	89.9289	74.2862	83.6781	86.525	83.5393	0.00366211	0.0449158	0.0447635	0.0463381	0.0445638	0.0460843	0.047513	0.0495919	0.0453133	0.0487447	0.0460907	0.0451014	0.0472439	0.0475071	0.0496305	0.0448808	0.046141	0.04763	0.0471333	0.0516696	0.0471697	0.0443429	0.0499746	0.048269	0.0487948	0.0485937	0.0443309	0.0476348	0.0469779	0.0491781	0.0509366
Deoxycytidine	HMDB0000014	3.5	14	28	10.4878	< LOD	< LOD	10.5837	13.5379	17.4898	< LOD	299.652	0	0	75.5975	96.699	124.927	0	0.0174419	< LOD	< LOD	< LOD	< LOD	< LOD	< LOD	< LOD	< LOD	< LOD	< LOD	< LOD	< LOD	< LOD	< LOD	< LOD	< LOD	< LOD	0.128249	< LOD	< LOD	0.119586	< LOD	< LOD	< LOD	< LOD	0.120481	< LOD	< LOD	< LOD	< LOD
Deoxyguanosine	HMDB0000085	1.44	5.76	11.52	< LOD	4.37949	12.6365	4.87931	5.11552	4.77822	4.71725	-0.804762	76.0329	109.692	84.7102	88.8111	82.9552	81.8966	0.00581114	< LOD	< LOD	< LOD	< LOD	< LOD	< LOD	< LOD	< LOD	< LOD	< LOD	< LOD	< LOD	< LOD	0.00811668	< LOD	< LOD	< LOD	< LOD	< LOD	< LOD	< LOD	< LOD	< LOD	< LOD	< LOD	< LOD	< LOD	< LOD	< LOD	< LOD
Deoxyinosine	HMDB0000071	0.8	3.2	6.4	0.699554	2.65443	7.78692	2.77342	2.91469	2.53528	2.69376	87.4443	82.951	121.671	86.6694	91.0842	79.2276	84.1799	0.00326442	< LOD	< LOD	< LOD	< LOD	0.0180299	< LOD	< LOD	0.0701165	< LOD	< LOD	< LOD	< LOD	0.0072505	0.0172273	< LOD	< LOD	< LOD	0.0188411	0.00786761	< LOD	< LOD	< LOD	< LOD	< LOD	< LOD	< LOD	< LOD	< LOD	0.010687	< LOD
Deoxyuridine	HMDB0000012	7	28	56	18.8235	38.6787	55.6579	22.7067	23.7238	26.0503	33.967	268.906	138.138	99.389	81.0953	84.7278	93.0369	121.311	0.219	< LOD	< LOD	< LOD	< LOD	< LOD	< LOD	< LOD	< LOD	< LOD	< LOD	< LOD	< LOD	< LOD	< LOD	< LOD	< LOD	< LOD	< LOD	< LOD	< LOD	< LOD	< LOD	< LOD	< LOD	< LOD	< LOD	< LOD	< LOD	< LOD	< LOD
Diacetylspermine	HMDB0002172	1.75	7	14	1.39327	5.80582	16.5436	6.01319	6.43631	5.40674	5.52162	79.6156	82.9404	118.169	85.9027	91.9473	77.2392	78.8803	0.0675676	0.112767	< LOD	0.11194	< LOD	< LOD	< LOD	< LOD	0.494835	< LOD	< LOD	< LOD	< LOD	0.0731417	0.260267	< LOD	< LOD	< LOD	< LOD	< LOD	< LOD	< LOD	< LOD	< LOD	0.0757626	< LOD	< LOD	< LOD	< LOD	< LOD	0.15224
Dimethylamine	HMDB0000087	17.5	70	140	15.4179	54.5138	155.019	60.362	54.8705	56.8163	50.0116	88.1024	77.8769	110.728	86.2314	78.3864	81.1661	71.4452	0.00785	< LOD	< LOD	< LOD	< LOD	< LOD	< LOD	< LOD	0.0887849	0.338797	< LOD	< LOD	< LOD	1.19658	< LOD	< LOD	< LOD	< LOD	0.354817	< LOD	0.246631	< LOD	< LOD	< LOD	0.307752	< LOD	< LOD	0.00935629	< LOD	0.482891	0.389803
DOPA	HMDB0000181	3.5	14	28	3.07684	11.6653	29.8544	12.9367	11.9565	11.5809	11.3762	87.9096	83.3234	106.623	92.4047	85.4033	82.721	81.2584	0.0243112	< LOD	< LOD	< LOD	< LOD	< LOD	< LOD	< LOD	0.0632263	< LOD	< LOD	< LOD	< LOD	< LOD	< LOD	< LOD	< LOD	< LOD	< LOD	< LOD	< LOD	< LOD	< LOD	< LOD	< LOD	< LOD	< LOD	< LOD	< LOD	< LOD	< LOD
Dopamine	HMDB0000073	7	28	56	5.75788	23.5522	59.7747	22.6629	22.5095	21.8058	20.7581	82.2554	84.1151	106.74	80.9388	80.3911	77.8779	74.1361	0.0150225	< LOD	< LOD	< LOD	< LOD	< LOD	< LOD	< LOD	0.186616	< LOD	< LOD	< LOD	0.0303208	< LOD	< LOD	< LOD	< LOD	< LOD	< LOD	0.0189391	< LOD	0.694457	< LOD	0.0443298	< LOD	< LOD	< LOD	< LOD	< LOD	< LOD	< LOD
Epinephrine	HMDB0000068	0.7	2.8	5.6	0.73984	2.60106	6.05297	2.45541	2.57026	3.01529	2.72146	105.691	92.895	108.089	87.6933	91.7949	107.689	97.1951	0.0100334	< LOD	< LOD	< LOD	< LOD	< LOD	< LOD	< LOD	< LOD	< LOD	< LOD	< LOD	< LOD	0.0126659	< LOD	< LOD	< LOD	< LOD	< LOD	< LOD	< LOD	< LOD	< LOD	< LOD	< LOD	< LOD	< LOD	< LOD	< LOD	0.0205139	0.0413325
Ethanolamine	HMDB0000149	7	28	56	6.31356	24.5162	61.696	23.7209	23.7818	21.0409	20.1185	90.1937	87.5579	110.171	84.7175	84.935	75.1461	71.8519	0.0431655	< LOD	< LOD	< LOD	0.108366	2.33845	1.84789	2.25318	1.13703	1.70766	1.41219	1.40999	1.47554	1.85544	1.89044	1.41542	< LOD	1.18034	2.0032	1.02788	1.75255	1.67129	1.55136	0.749418	2.12423	0.410855	1.61159	2.03956	0.0954729	6.85023	7.99447
gamma-Aminobutyric acid	HMDB0000112	0.4	1.6	3.2	0.297544	1.10248	3.00024	1.15445	1.16412	1.0504	0.956891	74.386	68.905	93.7576	72.1533	72.7574	65.6498	59.8057	0.00711	< LOD	< LOD	< LOD	< LOD	0.0987008	0.0493853	0.0724632	0.175862	0.115155	0.0317968	0.12816	0.0623979	0.125319	0.117011	0.0933269	< LOD	0.0613711	0.0474262	0.0567715	0.11301	0.0436167	0.0772314	0.0548721	0.0796345	0.0311932	0.0650868	0.0857526	< LOD	0.476306	0.592915
Glutamic acid	HMDB0000148	80	320	640	64.7164	210.774	745.52	292.182	301.131	255.807	227.305	80.8954	65.8668	116.488	91.3068	94.1034	79.9397	71.0329	0.128535	< LOD	< LOD	< LOD	1.6622	40.5446	30.3145	34.763	27.8497	50.7775	31.3772	38.2126	36.6943	59.6169	35.184	37.6856	1.82991	30.5761	33.1145	32.9512	43.7118	38.1426	38.8988	23.0055	50.0533	10.2382	57.6227	33.0004	1.33006	74.0802	115.564
Glutamine	HMDB0000641	160	640	1280	137.213	517.125	1378.51	579.18	589.78	496.272	467.38	85.7582	80.8009	107.696	90.4968	92.1531	77.5426	73.0281	0.129116	< LOD	< LOD	< LOD	6.68428	117.822	115.081	117.841	91.453	109.913	148.59	94.1621	103.85	116.433	106.988	77.712	7.60219	96.536	129.767	93.2988	106.453	128.431	106.212	65.3737	147.086	39.7305	104.02	88.9385	6.99744	505.335	477.552
Glycine	HMDB0000123	150	600	1200	133.272	481.065	1309.57	535.292	533.513	462.423	444.731	88.8479	80.1774	109.131	89.2152	88.9188	77.0705	74.1218	0.390016	0.409231	< LOD	< LOD	4.86719	64.4592	60.6823	60.9316	59.9224	61.2657	62.31	70.4959	51.3342	96.7053	40.7044	54.7094	5.04189	64.5829	59.9876	60.8121	75.2542	90.8247	75.504	34.7121	128.41	21.908	131.996	53.9033	4.84884	196.315	177.191
Guanine	HMDB0000132	0.45	1.8	3.6	0.388348	1.50163	4.00473	1.4218	1.5641	1.46567	1.55071	86.2996	83.4238	111.243	78.9886	86.8944	81.4261	86.1505	0.00721154	< LOD	< LOD	< LOD	< LOD	0.0229254	< LOD	0.0154095	0.0436611	< LOD	< LOD	< LOD	< LOD	< LOD	0.00776676	< LOD	< LOD	< LOD	< LOD	< LOD	0.00887776	0.00775493	< LOD	< LOD	< LOD	< LOD	0.015001	< LOD	< LOD	0.129699	0.111251
Guanosine	HMDB0000133	0.45	1.8	3.6	0.379563	1.43564	3.83443	1.59597	1.49287	1.49118	1.51637	84.3474	79.758	106.512	88.6649	82.9373	82.8433	84.2427	0.0027881	0.00962211	0.00495312	0.0275717	0.00691255	0.164619	0.0406735	0.131892	0.0187087	0.0428474	0.0381241	0.0306508	0.0490231	0.0669685	0.0536666	0.0276589	0.0105569	0.0316278	0.0930843	0.0286451	0.0583778	0.078011	0.0287692	0.0194741	0.0458714	0.0181624	0.0494667	0.0650506	0.0285771	0.966178	0.956649
Histamine	HMDB0000870	7	28	56	6.38855	24.5236	65.861	24.276	24.6336	23.5691	22.5506	91.265	87.5842	117.609	86.6999	87.977	84.1753	80.5378	0.0114679	< LOD	< LOD	< LOD	< LOD	0.209977	0.0352699	0.116408	< LOD	0.0728626	0.0799628	< LOD	< LOD	< LOD	< LOD	0.130657	< LOD	< LOD	0.0453426	0.0129992	0.0893234	< LOD	0.108307	< LOD	0.109328	< LOD	0.0326958	< LOD	< LOD	< LOD	< LOD
Histidine	HMDB0000177	35	140	280	29.709	113.778	309.315	125.313	124.294	102.463	107.342	84.8829	81.2701	110.47	89.509	88.7817	73.188	76.673	0.0554939	< LOD	< LOD	< LOD	0.64073	14.7255	19.4133	16.9421	15.4669	18.5768	14.6304	18.9572	16.0756	25.6835	18.0259	12.2603	0.779706	13.4658	18.8808	14.624	20.52	28.9073	17.1326	13.5402	30.9711	6.94111	40.7546	15.5215	0.776179	70.1233	79.6716
Homoarginine	HMDB0000670	1.6	6.4	12.8	1.36543	5.44569	15.0293	6.50679	6.60841	5.9718	5.72271	85.3395	85.089	117.416	101.669	103.256	93.3093	89.4173	0.00652884	< LOD	< LOD	< LOD	0.0530301	1.16585	1.20059	1.77331	0.934989	1.72821	1.45381	1.05012	1.32865	2.11981	1.82047	1.00336	0.0609872	1.33709	2.20715	1.36828	1.1885	1.6134	1.04409	1.49579	2.35207	0.384642	1.38631	1.05326	0.0773526	3.13333	2.36248
Homocitrulline	HMDB0000679	3.5	14	28	2.52352	12.2961	31.9508	12.4765	12.2259	12.1102	10.318	72.1005	87.8294	114.11	89.1178	87.3278	86.5017	73.6999	0.056391	< LOD	< LOD	< LOD	< LOD	< LOD	< LOD	0.149863	1.11437	< LOD	0.216121	0.267487	< LOD	0.135003	0.191611	< LOD	< LOD	< LOD	0.0698823	0.0641109	0.112111	0.0969874	< LOD	0.0947772	0.0924983	< LOD	< LOD	0.144203	< LOD	0.239505	0.2642
Hypoxanthine	HMDB0000157	14	56	112	10.3264	36.0677	78.5303	37.0731	35.7779	37.2284	34.4805	73.7601	64.4067	70.1163	66.2019	63.8892	66.4793	61.5723	0.00787	0.920016	0.920625	0.943745	0.935217	7.46596	2.24816	8.1182	1.61947	1.41664	1.41774	1.75186	2.698	2.89942	1.95554	1.56577	1.00167	1.16185	5.0697	1.39152	1.317	2.83651	1.41819	0.967908	1.7131	0.980666	1.86024	1.85206	0.949314	7.41894	8.47999
Indole	HMDB0000738	5	20	40	3.80884	13.7098	38.1068	14.4988	10.7147	8.27448	7.50481	76.1768	68.5488	95.2669	72.4939	53.5733	41.3724	37.5241	0.647	< LOD	< LOD	< LOD	< LOD	0.791104	< LOD	0.700869	1.15988	1.26787	1.01298	< LOD	1.57996	0.759179	1.05841	1.20876	< LOD	< LOD	0.698198	< LOD	1.09637	1.62754	0.85859	< LOD	< LOD	< LOD	0.94514	< LOD	< LOD	6.27568	8.1092
Indole-3-acetamide	HMDB0029739	1.125	4.5	9	0.990097	3.63795	9.97317	3.92494	3.86065	3.08036	3.2383	88.0086	80.8434	110.813	87.2209	85.7921	68.4524	71.9623	0.0219298	< LOD	< LOD	0.0410111	< LOD	< LOD	< LOD	< LOD	0.0524086	< LOD	< LOD	< LOD	< LOD	< LOD	< LOD	< LOD	< LOD	< LOD	< LOD	< LOD	< LOD	< LOD	< LOD	< LOD	< LOD	< LOD	< LOD	< LOD	< LOD	< LOD	< LOD
Inosine	HMDB0000195	5.6	22.4	44.8	18.4743	29.4143	42.8947	17.0509	19.3783	20.185	26.0098	329.897	131.314	95.7471	76.12	86.5103	90.1118	116.115	0.020339	< LOD	< LOD	< LOD	< LOD	3.82	< LOD	< LOD	< LOD	< LOD	< LOD	< LOD	< LOD	< LOD	< LOD	< LOD	< LOD	< LOD	< LOD	< LOD	< LOD	< LOD	< LOD	< LOD	< LOD	< LOD	< LOD	< LOD	< LOD	4.77612	< LOD
Isoleucine	HMDB0000172	35	140	280	29.313	118.932	333.514	122.201	126.375	116.888	117.294	83.7514	84.9511	119.112	87.2865	90.2682	83.4916	83.7811	0.360577	< LOD	< LOD	< LOD	1.3269	19.8003	17.9192	21.6199	19.4052	24.1489	17.4278	19.8758	14.5659	33.2734	25.1381	21.5169	1.41264	14.2776	19.9757	11.8076	21.1484	21.3265	15.838	24.3488	21.1891	6.2237	27.863	24.1784	1.37009	77.8008	88.4586
Kynurenine	HMDB0000684	7	28	56	6.87927	23.0053	60.4919	23.7208	27.3257	24.7454	25.1364	98.2753	82.1617	108.021	84.717	97.5916	88.3765	89.7729	0.023678	< LOD	< LOD	< LOD	< LOD	0.0798784	< LOD	< LOD	0.1986	< LOD	0.0324065	0.139162	< LOD	0.0426904	< LOD	0.0631413	< LOD	< LOD	0.0643281	< LOD	0.204579	< LOD	0.0462427	< LOD	0.0919444	< LOD	< LOD	0.0704061	< LOD	1.95567	2.3788
Leucine	HMDB0000687	35	140	280	29.5732	118.539	318.742	125.491	123.849	114.172	111.659	84.4949	84.671	113.837	89.6361	88.4632	81.5517	79.7561	0.255102	< LOD	< LOD	< LOD	2.75839	36.935	31.0656	39.4216	33.9809	38.3647	29.544	36.4727	30.0979	56.5187	45.5696	39.7561	2.72288	30.4223	35.5962	22.6217	37.181	39.2666	30.0091	45.8557	36.9602	11.0841	51.6572	42.4871	2.00216	147.403	184.057
Lysine	HMDB0000182	70	280	560	59.0658	216.114	630.258	255.956	256.599	225.496	205.978	84.3798	77.1837	112.546	91.4127	91.6425	80.5344	73.5637	0.404313	< LOD	< LOD	< LOD	0.814753	48.1982	29.5646	45.4806	41.5223	43.5174	34.6395	51.785	46.556	65.3946	44.0313	40.8	0.726496	38.3678	39.7846	32.1402	40.8788	51.3599	39.275	45.7857	59.2248	12.8773	55.0312	38.0354	0.569013	248.112	247.646
Methionine	HMDB0000696	35	140	280	30.6372	118.973	329.471	126.077	126.535	118.285	110.521	87.5348	84.9806	117.668	90.055	90.3824	84.4892	78.9437	0.110619	< LOD	< LOD	0.184271	0.277006	6.64112	4.44391	5.83289	3.86818	5.57072	3.93785	5.48951	4.73332	9.82641	7.08427	6.14952	0.280215	5.05067	5.00102	4.71405	4.44117	6.34816	4.31953	5.68672	6.93657	1.97925	7.23093	7.22129	0.673523	27.1385	25.3374
Methionine sulfoxide	HMDB0002005	7	28	56	6.97017	25.6852	69.0732	30.5778	31.5083	26.1642	26.7064	99.5738	91.7328	123.345	109.206	112.53	93.4435	95.38	0.131579	< LOD	< LOD	< LOD	< LOD	0.748245	0.692579	0.577051	0.254251	0.98897	0.541461	0.508151	0.687399	1.66027	0.889883	0.517837	< LOD	0.759529	0.493913	0.520111	0.908248	0.959233	0.552597	0.838545	1.07499	0.323053	1.17911	0.851461	< LOD	1.35742	1.26452
Methylamine	HMDB0000164	0.675	2.7	5.4	0.385354	2.03434	5.95051	2.23618	2.11563	2.44267	2.05934	57.0894	75.3459	110.195	82.8214	78.3566	90.4691	76.2718	0.121	< LOD	< LOD	0.20326	< LOD	< LOD	< LOD	< LOD	< LOD	< LOD	< LOD	0.268692	< LOD	< LOD	< LOD	< LOD	< LOD	< LOD	0.16873	0.223336	< LOD	< LOD	< LOD	< LOD	< LOD	< LOD	0.215129	0.346245	< LOD	< LOD	< LOD
Methylhistidine	HMDB0000479	7	28	56	5.62886	24.0475	57.8729	26.0635	27.305	23.7236	24.3066	80.4123	85.884	103.344	93.0838	97.5177	84.7273	86.8094	0.09375	< LOD	< LOD	< LOD	0.123675	1.77692	1.30585	3.308	5.63849	8.08793	2.17826	3.66978	1.61074	12.0999	5.66886	2.76453	0.184023	2.65096	1.72864	0.548573	2.95954	1.5274	2.17859	2.71746	1.30861	1.46669	2.85084	3.5098	0.123089	15.9545	45.4141
N-Acetylputrescine	HMDB0002064	0.225	0.9	1.8	0.230963	0.315475	< LOD	< LOD	< LOD	0.0494943	< LOD	102.65	35.0528	0	0	0	5.49936	0	0.0144231	< LOD	< LOD	> ULOQ	< LOD	< LOD	< LOD	< LOD	> ULOQ	0.122048	< LOD	< LOD	< LOD	< LOD	0.0534666	< LOD	< LOD	< LOD	< LOD	< LOD	0.275191	< LOD	0.0595819	< LOD	0.395376	< LOD	< LOD	0.609318	< LOD	< LOD	< LOD
N1-Acetylspermidine	HMDB0001276	0.9	3.6	7.2	0.8133	3.05826	7.76393	3.17784	3.09994	2.83745	2.97547	90.3667	84.9517	107.832	88.2732	86.1094	78.8182	82.6518	0.0206897	< LOD	< LOD	< LOD	< LOD	< LOD	< LOD	< LOD	< LOD	< LOD	< LOD	< LOD	< LOD	< LOD	< LOD	< LOD	< LOD	< LOD	< LOD	< LOD	< LOD	< LOD	< LOD	< LOD	< LOD	< LOD	< LOD	< LOD	< LOD	0.0754069	0.100687
N2-Acetyl-Ornithine	HMDB0003357	3.5	14	28	2.5209	11.3349	31.3975	11.53	11.207	10.1914	9.50459	72.0258	80.9636	112.134	82.3568	80.05	72.796	67.89	0.0920245	< LOD	< LOD	< LOD	< LOD	< LOD	< LOD	0.141188	0.139954	1.39531	0.113213	0.231102	< LOD	< LOD	< LOD	< LOD	< LOD	< LOD	0.591611	< LOD	< LOD	0.158275	< LOD	< LOD	0.111823	< LOD	0.632158	0.12604	< LOD	0.825523	0.438914
Nicotinamide ribotide	HMDB0000229	4.2	16.8	33.6	2.15273	10.6283	35.4314	8.74071	10.1859	9.45824	11.5925	51.2555	63.2637	105.451	52.028	60.6305	56.299	69.0028	0.332	0.624107	0.542489	0.642438	0.586345	0.983373	0.853802	0.840711	0.848868	1.04693	0.936999	1.03759	0.847366	1.29657	0.940544	1.04047	0.523309	0.947383	0.958033	1.07226	0.973969	0.642027	1.00293	0.985737	1.03415	0.662405	1.06873	1.12285	0.538176	0.557136	0.523089
Nitro-Tyrosine	HMDB0255667	8	32	64	7.20331	25.7598	65.6842	27.3841	26.6072	22.4975	21.6538	90.0414	80.4995	102.631	85.5754	83.1474	70.3048	67.6682	0.0595238	< LOD	< LOD	1.74386	< LOD	< LOD	< LOD	< LOD	0.12313	< LOD	< LOD	< LOD	< LOD	< LOD	< LOD	< LOD	< LOD	< LOD	< LOD	< LOD	< LOD	< LOD	< LOD	2.31237	< LOD	< LOD	< LOD	< LOD	< LOD	< LOD	< LOD
Norepinephrine	HMDB0000216	1	4	8	0.826948	3.57465	8.22437	3.29734	3.5184	3.1922	3.23115	82.6948	89.3663	102.805	82.4336	87.96	79.8049	80.7786	0.0986842	< LOD	< LOD	< LOD	< LOD	< LOD	< LOD	< LOD	0.178553	< LOD	< LOD	< LOD	< LOD	< LOD	< LOD	< LOD	< LOD	< LOD	< LOD	< LOD	< LOD	< LOD	< LOD	< LOD	< LOD	< LOD	< LOD	< LOD	< LOD	< LOD	< LOD
Nudifloramide	HMDB0004193	5.25	21	42	4.21443	17.753	47.5482	18.6545	18.2865	18.3151	16.0568	80.2749	84.5382	113.21	88.8309	87.0788	87.2148	76.4607	0.358	< LOD	< LOD	< LOD	< LOD	0.446961	< LOD	0.415136	< LOD	< LOD	< LOD	0.487735	< LOD	0.486574	0.499509	< LOD	< LOD	< LOD	< LOD	< LOD	< LOD	< LOD	< LOD	< LOD	< LOD	< LOD	< LOD	< LOD	< LOD	1.20585	1.41922
Ornithine	HMDB0000214	35	140	280	27.336	98.4158	313.785	110.755	87.6025	73.9451	66.0457	78.103	70.297	112.066	79.1108	62.5732	52.8179	47.1755	0.0588466	< LOD	< LOD	< LOD	0.53755	24.4242	22.0052	27.4776	18.2956	22.1183	21.0114	25.5262	26.3646	47.9459	16.7734	16.1951	0.641159	18.913	28.3563	17.9565	21.3357	16.2885	21.1905	17.6632	40.7654	7.18718	58.5843	15.3503	0.306446	71.9081	101.25
Phenylalanine	HMDB0000159	35	140	280	33.4973	110.794	245.506	126.663	120.603	107.086	104.091	95.7067	79.1384	87.6807	90.4738	86.145	76.4902	74.3505	0.044484	< LOD	< LOD	< LOD	< LOD	15.5865	14.08	21.4347	12.0775	18.5547	11.9597	18.2214	16.0395	25.3543	15.2975	14.3273	< LOD	9.70031	15.3089	10.6013	16.1068	18.9362	12.6074	13.7264	20.5034	3.40274	26.9155	16.3684	< LOD	71.885	82.1434
Phenylethylamine	HMDB0012275	7	28	56	6.30727	23.8523	62.1749	25.2559	24.2747	24.9901	21.9013	90.1038	85.1869	111.027	90.1998	86.6954	89.2504	78.219	0.019211	0.0736642	0.0729816	0.0728443	0.1055	0.0831661	0.0802214	0.0791158	0.105457	0.0734057	0.0745512	0.0784305	0.0754742	0.0760701	0.0736289	0.0735197	0.0713696	0.0723867	0.0715625	0.0730861	0.0760804	0.0734736	0.073041	0.0765389	0.0720698	0.072646	0.0773316	0.0740657	0.070236	0.0794951	0.0755928
Proline	HMDB0000162	70	280	560	62.306	238.446	587.666	252.8	242.081	219.285	213.179	89.0086	85.1594	104.94	90.2859	86.4573	78.3162	76.1352	0.694444	< LOD	< LOD	< LOD	3.90179	49.6384	53.2905	43.1776	53.3887	44.7695	69.5935	46.7443	37.1007	91.3114	40.2485	47.8892	4.07845	90.4386	49.3416	33.0213	68.4609	61.917	55.4256	46.1673	66.7047	14.0389	59.1778	65.3752	4.19006	267.51	557.786
Putrescine	HMDB0001414	0.9	3.6	7.2	0.784144	3.07781	7.81255	2.94119	3.02483	2.55392	2.59923	87.1271	85.4948	108.508	81.6998	84.0231	70.9421	72.201	0.0666667	< LOD	< LOD	< LOD	< LOD	< LOD	0.217706	0.0856026	0.107323	0.105796	0.126757	< LOD	< LOD	0.108679	0.0912739	< LOD	< LOD	< LOD	< LOD	< LOD	0.314223	0.175907	0.116584	< LOD	0.119394	< LOD	3.04114	< LOD	< LOD	0.106486	0.138779
Sarcosine	HMDB0000271	7	28	56	6.6522	20.8956	60.8254	24.7763	23.4114	19.9756	19.0593	95.0314	74.6272	108.617	88.4869	83.612	71.3413	68.0691	0.0297695	< LOD	< LOD	< LOD	< LOD	0.12753	0.43126	0.431242	0.410996	0.200656	0.552216	0.349018	0.0320955	0.532713	0.275592	0.299537	< LOD	0.385394	1.26218	0.214652	0.743162	0.208085	0.252426	0.221015	0.238673	< LOD	0.148963	0.222777	< LOD	1.18994	1.50154
Serine	HMDB0000187	35	140	280	33.1928	121.67	302.225	123.17	130.195	118.479	107.096	94.8365	86.9071	107.938	87.9787	92.9966	84.6276	76.4972	0.15448	< LOD	< LOD	< LOD	2.47505	31.8455	49.2647	28.578	20.5236	52.556	34.6354	57.6235	36.6946	78.0749	31.4074	28.1989	3.18352	29.4381	28.9903	35.4365	48.0042	106.613	53.3243	21.5645	111.566	21.3226	175.553	42.1221	2.49895	123.425	109.591
Serotonin	HMDB0000259	0.8	3.2	6.4	0.672741	2.50039	6.70788	2.46963	2.45791	2.28069	2.41639	84.0926	78.1373	104.811	77.176	76.8098	71.2714	75.5122	0.023622	< LOD	< LOD	< LOD	< LOD	0.0804091	0.0476809	0.124006	0.142499	0.233423	0.10117	0.105057	0.125943	0.0826239	0.118369	0.0777386	< LOD	0.0825122	0.128356	0.0582563	0.224539	0.102971	0.167939	0.0928216	0.123794	0.0296358	0.16971	0.182751	< LOD	0.583783	0.666772
Spermidine	HMDB0001257	1.75	7	14	1.5296	5.74791	15.2771	5.77744	5.24352	4.89155	4.59897	87.4058	82.113	109.122	82.5349	74.9074	69.8793	65.6995	0.0218571	< LOD	< LOD	< LOD	0.0912935	4.34761	3.45818	6.09736	3.07091	4.77181	5.69837	4.9341	3.48092	3.46117	4.21066	4.63213	0.0791408	5.32906	4.55227	2.92483	7.06802	5.67735	4.54295	3.126	5.35429	1.2951	3.52041	2.94705	0.111846	0.239723	0.230542
Spermine	HMDB0001256	1.75	7	14	1.68643	5.82548	15.5652	5.64859	5.1716	5.42547	5.82033	96.3672	83.2211	111.18	80.6942	73.8801	77.5067	83.1476	0.0441176	< LOD	< LOD	< LOD	0.126677	1.77007	1.12576	1.97507	1.18709	2.85901	1.98147	1.8472	1.53924	1.18818	0.919198	1.9992	0.0606811	1.60163	0.944997	1.00146	1.21009	1.66945	0.846081	0.689686	1.74074	0.31101	1.11795	1.43257	0.0810324	0.0606338	0.0554045
Taurine	HMDB0000251	17.5	70	140	15.089	56.8139	151.981	62.2557	57.958	49.0553	46.1018	86.2227	81.1627	108.558	88.9367	82.7972	70.0791	65.8598	0.255973	< LOD	< LOD	< LOD	4.6905	60.1178	47.472	89.7821	78.5105	97.2514	60.4385	68.1637	61.8691	44.4723	44.362	41.4125	4.62952	58.2386	54.6904	34.0949	70.7958	66.4098	67.5559	27.2285	61.2508	10.8237	60.6653	77.9592	4.56224	101.334	129.73
Threonine	HMDB0000167	35	140	280	28.8165	102.258	286.815	112.099	111.695	98.2061	96.6898	82.3327	73.0412	102.434	80.0711	79.7821	70.1472	69.0642	0.669643	< LOD	< LOD	116.977	2.35181	33.6439	18.3843	25.6539	30.4319	30.0777	16.1501	23.5831	20.283	40.7529	22.8652	27.1712	2.56589	27.6189	29.3504	22.9314	22.5362	34.9578	27.3538	24.1918	41.4921	9.1207	41.9207	32.7685	2.67411	114.256	111.234
Thymidine	HMDB0000273	0.45	1.8	3.6	< LOD	< LOD	4.00445	3.34797	3.14287	2.54889	< LOD	0	0	111.235	185.998	174.604	141.605	0	0.0326087	> ULOQ	> ULOQ	> ULOQ	> ULOQ	> ULOQ	> ULOQ	> ULOQ	2.99049	> ULOQ	> ULOQ	> ULOQ	> ULOQ	> ULOQ	> ULOQ	> ULOQ	> ULOQ	> ULOQ	> ULOQ	> ULOQ	> ULOQ	> ULOQ	> ULOQ	> ULOQ	> ULOQ	> ULOQ	> ULOQ	> ULOQ	> ULOQ	3.30772	3.60706
Thymine	HMDB0000262	5.6	22.4	44.8	6.41671	18.4639	47.54	18.3729	19.0337	17.6937	18.0748	114.584	82.4281	106.116	82.0219	84.9719	78.9899	80.691	0.059197	0.536042	0.194628	0.180338	0.43301	0.355977	0.687226	0.606033	7.65569	0.245918	0.815298	0.664252	0.62585	0.308358	0.990086	0.349928	0.290798	0.149399	0.560409	0.526482	0.767761	6.25684	0.440711	0.106157	0.498911	0.384981	0.830863	0.113091	< LOD	1.88791	0.712219
trans-4-Hydroxyproline	HMDB0000725	7	28	56	6.17065	22.092	58.98	25.0886	25.1391	22.8414	23.2034	88.1522	78.9001	105.321	89.6021	89.7827	81.5764	82.8694	0.0906344	< LOD	< LOD	< LOD	< LOD	0.679609	0.713197	1.78172	1.15476	0.617138	0.840301	0.522047	0.910646	2.05225	3.13633	1.37178	< LOD	2.00979	1.0696	0.434656	1.19003	0.953106	1.34833	1.50055	0.778245	0.846881	0.664605	1.3484	< LOD	6.19278	7.22452
Trimethylamine	HMDB0000906	35	140	280	< LOD	127.325	266.172	107.963	74.1833	82.5316	64.0997	-126.954	90.9466	95.0613	77.1166	52.9881	58.9511	45.7855	0.0828	< LOD	< LOD	< LOD	< LOD	< LOD	< LOD	< LOD	< LOD	< LOD	< LOD	< LOD	< LOD	< LOD	< LOD	< LOD	< LOD	< LOD	< LOD	< LOD	< LOD	< LOD	< LOD	< LOD	< LOD	< LOD	< LOD	< LOD	< LOD	< LOD	< LOD
Trimethylamine N-Oxide	HMDB0000925	70	280	560	54.99	221.193	655.498	216.983	231.277	207.565	200.116	78.5572	78.9974	117.053	77.494	82.5989	74.1304	71.47	0.097345	2.11633	2.08294	2.06496	2.26173	2.73838	2.33977	2.53053	5.40146	3.69151	2.47147	2.74169	2.41065	12.0038	2.31885	2.60019	2.25402	2.49426	2.66758	2.31376	4.00696	6.35836	3.63425	2.82348	2.61339	2.21821	2.61449	3.30266	2.19994	8.92737	6.60573
Tryptamine	HMDB0000303	0.225	0.9	1.8	0.209755	0.775842	1.93211	0.806601	0.765853	0.74744	0.670042	93.2246	86.2047	107.339	89.6224	85.0948	83.0489	74.4491	0.00139147	< LOD	< LOD	< LOD	0.00323897	0.00156014	0.00232456	< LOD	0.00396181	0.00162543	< LOD	< LOD	< LOD	0.00306311	0.00166977	0.00141267	< LOD	< LOD	< LOD	< LOD	0.00434238	< LOD	0.00153707	< LOD	< LOD	< LOD	0.00630524	< LOD	< LOD	< LOD	< LOD
Tryptophan	HMDB0000929	40	160	320	33.7489	129.434	361.477	143.801	143.405	129.256	121.245	84.3724	80.8962	112.962	89.8754	89.6282	80.7849	75.778	0.033952	< LOD	< LOD	< LOD	0.11942	10.2811	7.88606	7.55172	7.16272	8.35815	7.19307	8.91595	7.31396	8.70953	11.2243	13.0635	0.0871007	6.56334	9.48216	7.35596	9.99119	10.1523	8.1486	9.55085	13.5515	2.85415	13.8413	9.63307	0.0483074	65.0789	76.8015
Tyramine	HMDB0000306	0.225	0.9	1.8	0.182187	0.788645	2.01368	0.786875	0.769542	0.671158	0.731251	80.9722	87.6272	111.871	87.4305	85.5047	74.5731	81.2501	0.0258621	< LOD	< LOD	< LOD	< LOD	< LOD	0.0422955	< LOD	0.0475904	< LOD	< LOD	< LOD	< LOD	< LOD	< LOD	< LOD	< LOD	< LOD	< LOD	< LOD	0.0603177	0.0617439	0.0313086	< LOD	0.0295856	< LOD	0.461168	< LOD	< LOD	< LOD	< LOD
Tyrosine	HMDB0000158	40	160	320	35.7234	131.85	367.197	142.316	137.964	116.334	110.805	89.3084	82.4064	114.749	88.9474	86.2273	72.7087	69.2532	0.180723	< LOD	< LOD	< LOD	0.990439	21.5952	20.2274	22.3938	14.0898	28.4347	19.0156	21.5463	19.42	44.4479	22.7313	23.9201	0.936583	16.331	24.4388	17.2354	28.5532	56.8401	19.7419	24.7735	31.4371	6.26495	35.4002	30.3824	0.867975	98.7107	116.159
Uracil	HMDB0000300	2.25	9	18	< LOD	< LOD	13.6347	< LOD	< LOD	< LOD	< LOD	53.5284	48.9988	75.7485	46.4933	49.8011	49.3703	51.6593	9.5238	< LOD	< LOD	< LOD	< LOD	< LOD	< LOD	< LOD	< LOD	< LOD	< LOD	< LOD	< LOD	< LOD	< LOD	< LOD	< LOD	< LOD	< LOD	< LOD	< LOD	< LOD	< LOD	< LOD	< LOD	< LOD	< LOD	< LOD	< LOD	< LOD	< LOD
Urea	HMDB0000294	750	3000	6000	601.264	2679.79	6967.03	2546.22	2486.24	2413.98	2115.17	80.1685	89.3264	116.117	84.8742	82.8748	80.4661	70.5058	102.35	< LOD	< LOD	< LOD	145.109	1377.2	1815.98	1840.43	1429.94	1403.66	1735.59	1849.22	1173.78	1955.88	1129.16	1239.31	112.56	1138.51	1470.6	913.093	1846.09	2464.14	1312.93	1047.73	1632.68	245.963	3043.29	1714.03	< LOD	4713.3	6585.33
Uridine	HMDB0000296	2.8	11.2	22.4	2.47723	20.643	21.216	7.875	10.2363	7.1894	7.40577	88.4726	184.312	94.7145	70.3125	91.3953	64.1911	66.1229	0.307692	< LOD	< LOD	0.325011	< LOD	1.16583	0.604358	0.766772	0.623616	1.19109	< LOD	0.394229	1.25709	0.869286	1.04787	0.625138	< LOD	0.596027	1.17549	1.15261	1.62003	0.516173	< LOD	< LOD	1.53962	< LOD	0.807541	0.778757	< LOD	3.63039	3.52659
Valine	HMDB0000883	70	280	560	59.9761	234.782	602.275	255.9	254.912	230.032	216.343	85.6801	83.8508	107.549	91.3928	91.0399	82.1544	77.2652	0.294695	< LOD	< LOD	< LOD	4.65509	60.2261	45.3934	60.9399	48.2129	67.087	49.0686	60.7433	52.0685	76.6964	77.2208	57.1518	4.70959	37.7012	57.649	38.3614	62.328	61.8701	49.1957	61.6026	60.9015	20.065	78.7837	74.9081	4.57761	231.935	334.001
[truncated: 44 more columns]

## Sheet: Panel B
		Theoretical Concentration (µM)			Calculated Concentration (µM)							Accuracy (%)								ID#122123	ID#122124	ID#122125	ID#122126	ID#122127	ID#122128	ID#122129	ID#122130	ID#122131	ID#122132	ID#122133	ID#122134	ID#122135	ID#122136	ID#122137	ID#122138	ID#122139	ID#122140	ID#122141	ID#122142	ID#122143	ID#122144	ID#122145	ID#122146	ID#122147	ID#122148	ID#122149	ID#122150	ID#122152	ID#122153
Measure Name	HMBD ID	QC-1	QC-2	QC-3	QC-1[1]	QC-2[1]	QC-3[1]	QC-2[1]-QC_2	QC-2[1]-QC_2	QC-2[1]-QC_2	QC-2[1]-QC_2	QC-1[1]	QC-2[1]	QC-3[1]	QC-2[1]-QC_2	QC-2[1]-QC_2	QC-2[1]-QC_2	QC-2[1]-QC_2	LOD	Exp_DBS_0_1_1	Exp_DBS_0_2_1	Exp_DBS_0_3_1	Exp_DBS_pool_1_1	Exp_5_A_1	Exp_2_F_1	Exp_9_F_1	Exp_11_F_1	Exp_8_A_1	Exp_2_A_1	Exp_11_A_1	Exp_9_A_1	Exp_3_F_1	Exp_4_F_1	Exp_5_F_1	Exp_DBS_pool_2_1	Exp_3_A_1	Exp_6_A_1	Exp_1_F_1	Exp_7_F_1	Exp_10_F_1	Exp_7_A_1	Exp_6_F_1	Exp_1_A_1	Exp_4_A_1	Exp_10_A_1	Exp_8_F_1	Exp_DBS_pool_3_1	Exp_Serum_pool_1_1	Exp_7_SF_1
2,5-Furandicarboxylic acid	HMDB0004812	0.8	3.2	6.4	0.685405	2.82061	5.71338	3.46987	2.92645	3.22462	3.78378	85.6756	88.1439	89.2715	108.434	91.4516	100.769	118.243	0.0124481	0.0346259	0.0333934	0.0335588	0.0363492	0.0345485	0.0347308	0.0340777	0.0344301	0.0359655	0.0353496	0.0339188	0.0344814	0.0390654	0.0348292	0.0359639	0.037012	0.034841	0.03635	0.0381014	0.0375939	0.035386	0.0353533	0.0406913	0.0353154	0.0329436	0.0334688	0.0351368	0.0347815	0.162414	0.116328
2-Hydroxy-2-methylbutyric acid	HMDB0001987	0.875	3.5	7	0.834017	2.97166	5.13758	2.64247	3.00218	3.21524	3.1803	95.3163	84.9046	73.394	75.4992	85.7765	91.864	90.8657	0.213056	1.1861	< LOD	< LOD	< LOD	< LOD	0.366623	< LOD	0.255944	0.287684	0.320654	< LOD	0.353427	< LOD	0.317366	0.25733	< LOD	< LOD	< LOD	< LOD	0.332797	< LOD	< LOD	< LOD	0.97202	< LOD	0.379755	0.687674	0.423387	< LOD	< LOD
2-Hydroxy-3-methylvaleric acid	HMDB0000317	0.875	3.5	7	0.807021	3.17926	6.24829	3.64442	3.12372	3.17708	3.62168	92.231	90.8359	89.2613	104.126	89.2491	90.7738	103.477	0.0176056	0.0736203	0.165939	0.235454	0.0931644	0.126221	0.130799	0.0808731	0.0884501	0.0896286	0.106545	0.0860289	0.078349	0.0912317	0.15148	0.0920971	0.0902683	0.0854908	0.111519	0.59403	0.0942557	0.0962111	0.652524	0.765963	0.0873206	0.0811692	0.0987391	0.102044	0.0845201	0.730625	1.13083
2-Hydroxybutyric acid	HMDB0000008	14	56	112	13.8474	49.5507	97.1343	58.8722	49.3056	48.5551	58.2362	98.91	88.4834	86.7271	105.129	88.0458	86.7056	103.993	0.115163	0.862976	0.684292	0.788445	2.89832	2.98645	2.53305	2.16418	2.98664	3.90521	1.72157	4.74392	2.59047	2.65079	3.35505	2.31008	2.45273	2.80918	1.85894	1.54951	2.66548	1.85107	2.44005	2.04411	3.08633	1.93947	2.33657	2.97435	2.1537	25.4257	30.3136
2-hydroxyglutaric acid	HMDB0059655	0.5625	2.25	4.5	0.496034	2.06637	4.54452	2.31688	1.91174	2.14669	2.53639	88.1838	91.8387	100.989	102.972	84.9661	95.4087	112.729	0.0100267	0.116232	0.0916369	0.0805997	0.158891	0.098545	0.112969	0.0899747	0.130581	0.0892334	0.106252	0.108231	0.117108	0.104078	0.145538	0.109617	0.135502	0.102109	0.125458	0.103926	0.148338	0.117101	0.0678077	0.113376	0.244991	0.0812717	0.133464	0.0937181	0.147999	0.362936	0.4411
2-Hydroxyisobutyric acid	HMDB0000729	0.875	3.5	7	0.763381	2.95465	5.09638	3.2459	2.91242	2.82854	3.10065	87.2436	84.4185	72.8054	92.74	83.2121	80.8155	88.5901	0.0223214	< LOD	< LOD	< LOD	1.39926	0.057291	0.0810426	0.0328343	0.0869414	0.0640095	0.0566182	0.124941	0.0659082	< LOD	0.0683021	0.0449358	0.0712032	0.0670265	0.0860566	0.0481505	0.118334	0.0888181	0.0554671	0.0496222	0.188516	< LOD	0.142753	0.0573916	0.0445506	1.02678	2.363
2-Hydroxyisovaleric acid	HMDB0000407	3.5	14	28	3.58763	13.6216	24.267	16.3808	12.93	13.5097	15.3415	102.504	97.2974	86.6677	117.006	92.3569	96.4978	109.582	0.0100267	0.153724	0.156089	0.153923	0.861924	0.678799	1.19348	0.531266	0.663868	0.514348	0.894478	0.671656	0.546143	0.525225	1.30279	0.524919	0.67609	0.466271	0.980049	0.331456	0.791764	0.87335	0.466781	0.518451	0.607733	0.480964	0.701285	0.703396	0.48629	8.58226	14.1407
2-Hydroxyphenylacetic acid	HMDB0000669	0.625	2.5	5	0.504776	2.12882	4.29153	2.33905	1.98529	2.34458	2.79939	80.7642	85.153	85.8307	93.5621	79.4118	93.783	111.976	0.0426136	< LOD	< LOD	< LOD	< LOD	< LOD	< LOD	< LOD	< LOD	< LOD	< LOD	< LOD	0.060164	< LOD	< LOD	< LOD	< LOD	0.0529122	< LOD	0.0694351	0.0860143	< LOD	0.047171	0.0648647	0.113771	0.0453183	< LOD	< LOD	< LOD	0.0492675	0.0848898
2-Oxoadipic acid	HMDB0000225	8.75	35	70	9.24453	33.7624	60.8637	35.6795	29.0988	30.2704	35.7481	105.652	96.4639	86.9482	101.941	83.1395	86.4869	102.137	1.33929	< LOD	< LOD	< LOD	< LOD	< LOD	< LOD	< LOD	< LOD	1.40436	< LOD	< LOD	< LOD	< LOD	< LOD	< LOD	1.47245	< LOD	< LOD	< LOD	< LOD	< LOD	< LOD	< LOD	< LOD	< LOD	< LOD	< LOD	< LOD	8.51692	23.3921
2-Oxoisocaproic acid	HMDB0000695	22.4	89.6	179.2	20.8613	73.6512	155.904	98.9098	72.277	91.4107	119.408	93.131	82.2	87.0001	110.39	80.6663	102.021	133.268	0.057041	1.53534	1.46361	1.49265	3.51618	3.21851	3.91135	3.53309	3.58745	3.50356	3.87047	3.61157	3.2172	3.07208	6.86152	3.86222	3.71673	3.69504	4.16932	2.5648	3.12592	3.71019	3.07468	3.38324	4.6751	2.62231	3.34365	4.30149	3.34089	59.5268	78.1349
3,4-Dihydroxybutyric acid	HMDB0000337	7	28	56	7.00917	25.787	43.3683	27.8052	23.4398	25.2448	23.7212	100.131	92.0965	77.4434	99.3042	83.7137	90.16	84.7187	0.0984	2.30694	2.32991	1.47894	1.82575	1.1238	1.42927	1.39819	1.90701	1.26154	1.77373	1.6199	1.78971	1.77018	1.7636	1.55775	1.58326	1.67398	1.31936	1.23019	1.25792	1.60089	1.62437	1.50511	2.15931	1.39494	1.98407	1.78182	1.47297	2.47108	6.2398
3-(3-Hydroxyphenyl)-3-hydroxypropanoic acid	HMDB0002643	0.25	1	2	0.216355	0.895821	1.79131	1.17481	0.880908	0.893802	1.03508	86.5422	89.5821	89.5653	117.481	88.0908	89.3802	103.508	0.00194502	0.011067	< LOD	0.00968197	0.020451	0.0179114	0.0306825	0.0308675	0.0266165	0.0298851	0.0297008	0.0279021	0.0130779	< LOD	0.0644572	0.0265425	0.0225669	0.029766	0.0152849	0.0121338	0.0260347	0.0212692	0.0122684	0.0341601	0.018144	0.0117258	0.0137162	0.0159815	0.0209111	0.203013	0.0587373
3-Aminoisobutyric acid	HMDB0003911	7	28	56	4.80948	29.4776	55.2741	26.2007	26.2806	28.6216	31.6737	68.7069	105.277	98.7038	93.5739	93.8595	102.22	113.12	0.24	< LOD	< LOD	< LOD	< LOD	< LOD	< LOD	< LOD	< LOD	< LOD	< LOD	< LOD	< LOD	< LOD	< LOD	< LOD	< LOD	0.677573	< LOD	< LOD	< LOD	0.465975	< LOD	0.405258	0.563973	< LOD	0.640972	< LOD	< LOD	0.478578	0.355813
3-Carboxy-4-methyl-5-propyl-2-furanpropionic acid	HMDB0061112	8.75	35	70	7.62104	29.282	58.0236	40.624	29.9831	35.842	47.6924	87.0977	83.6628	82.8909	116.069	85.6661	102.406	136.264	0.0259875	0.516522	0.512191	0.507703	0.665561	0.550184	0.555755	0.633799	0.555146	0.689408	0.5866	0.562377	0.719415	0.781798	0.773823	0.658805	0.681124	0.637426	0.572419	0.518835	0.752759	0.859185	0.625156	0.588635	0.5462	0.71913	0.56655	0.773018	0.635859	5.13692	8.45163
3-Deoxyglucosone	HMDB0245856	0.28125	1.125	2.25	0.256388	1.0217	2.13891	1.2539	1.14875	1.4018	2.07346	91.16	90.8175	95.0626	111.458	102.111	124.604	184.307	0.0110294	0.0173523	0.014347	0.0144372	0.03191	0.0251002	0.0426142	0.0370492	0.0435686	0.03223	0.0309581	0.0315281	0.0476506	0.0361841	0.0472067	0.0313087	0.0347537	0.0424119	0.0362024	0.0314407	0.0429426	0.0380364	0.0272571	0.0295127	0.0467813	0.024013	0.0321472	0.040325	0.0312637	0.0667825	0.0799523
3-Hydroxybutyric acid	HMDB0000011	35	140	280	32.4687	126.93	251.281	146.318	123.56	136.546	147.194	92.7676	90.6646	89.7434	104.513	88.2574	97.5329	105.138	0.223547	1.61981	1.56675	1.54238	6.82986	4.08835	4.86446	3.24487	3.153	8.40011	3.15345	2.98515	2.54757	3.41981	3.35067	3.07161	3.3164	2.9765	2.79269	3.22041	3.48058	2.7281	3.06723	3.26827	3.73725	2.19767	2.35236	3.24324	2.91014	25.0519	31.0681
3-Hydroxyisobutyric acid	HMDB0000336	4.375	17.5	35	3.66077	15.4923	31.609	17.1511	15.5191	15.5353	18.8053	83.6748	88.5276	90.3115	98.0061	88.6805	88.773	107.459	0.25	< LOD	< LOD	< LOD	6.1389	1.18805	1.0455	0.881889	1.40228	1.52323	0.887738	1.22467	1.00802	1.45702	1.37359	1.29858	1.17561	0.898491	0.828234	0.843944	1.2937	0.727646	0.702433	1.30702	1.84767	0.487335	0.681809	2.12171	0.878255	15.3293	19.1111
3-Hydroxyisovaleric acid	HMDB0000754	3.5	14	28	3.34684	12.7412	25.4174	15.4962	13.0588	12.6871	15.6148	95.624	91.0084	90.7763	110.687	93.2774	90.6221	111.534	0.0879461	0.162289	0.0959812	< LOD	9.55492	0.335056	0.433644	0.219068	0.348607	0.382335	0.44019	0.403784	0.324019	0.29786	0.435563	0.289787	0.289062	0.321336	0.318082	0.259126	0.473221	0.31952	0.281272	0.345118	0.572676	0.171804	0.306016	0.429297	0.29966	2.59641	4.33858
3-Hydroxyphenylacetic acid	HMDB0000440	0.875	3.5	7	0.777255	2.50973	5.93783	3.55262	2.80813	2.98802	3.62288	88.8291	71.7065	84.8262	101.504	80.2323	85.3721	103.511	0.202703	< LOD	< LOD	< LOD	< LOD	< LOD	< LOD	< LOD	< LOD	< LOD	< LOD	< LOD	< LOD	< LOD	< LOD	< LOD	< LOD	< LOD	< LOD	< LOD	< LOD	< LOD	< LOD	< LOD	< LOD	< LOD	< LOD	< LOD	< LOD	< LOD	0.225036
3-Indoleacetic acid	HMDB0000197	2.1875	8.75	17.5	1.99867	7.98108	13.1708	8.468	7.36528	8.1396	8.46909	91.3679	91.2123	75.2619	96.7771	84.1747	93.024	96.7896	0.0568182	0.132778	0.127721	0.115708	0.179852	0.178939	0.42388	0.160274	0.146427	0.153428	0.538454	0.160928	0.16257	0.169014	0.165217	0.179776	0.192561	0.20468	0.202369	0.140123	0.21358	0.123178	0.172982	0.228673	0.182732	0.121771	0.148916	0.16934	0.188987	2.50362	3.38543
3-Methyladipic acid	HMDB0000555	0.28125	1.125	2.25	0.248815	1.01902	2.07488	1.23508	0.958042	1.05467	1.2672	88.4677	90.58	92.217	109.785	85.1593	93.7485	112.64	0.00801282	0.0181841	0.0130035	< LOD	0.0248772	0.0189235	0.0185235	0.0208441	0.0180757	0.0171698	0.0141292	0.0186735	0.0133729	0.0127637	0.0579552	0.0182513	0.0176559	0.0160109	0.015083	0.021807	0.0192465	0.0273291	0.0104882	0.0173019	0.0379312	< LOD	0.0198842	0.026733	0.0147286	0.0555707	0.0483271
4-Ethylphenyl sulfate	HMDB0062551	0.8	3.2	6.4	1.3755	3.79919	6.77457	4.35845	3.46438	3.87811	4.44629	171.938	118.725	105.853	136.202	108.262	121.191	138.947	0.143542	< LOD	< LOD	< LOD	< LOD	< LOD	< LOD	< LOD	< LOD	< LOD	< LOD	< LOD	< LOD	< LOD	< LOD	< LOD	< LOD	< LOD	< LOD	< LOD	< LOD	< LOD	< LOD	< LOD	< LOD	< LOD	< LOD	< LOD	< LOD	< LOD	< LOD
4-Hydroxybenzoic acid	HMDB0000500	1.09375	4.375	8.75	1.0356	4.23478	10.0493	5.77281	4.20622	4.44495	5.14747	94.6838	96.795	114.85	131.95	96.1421	101.599	117.657	0.080819	0.108653	0.132798	0.12197	0.196501	0.146054	0.210053	0.190037	0.188486	0.23502	0.196936	0.169111	0.227007	0.15565	0.223158	0.15793	0.153725	0.211134	0.179663	0.200006	0.227712	0.162888	0.152915	0.184828	0.240731	0.168055	0.168977	0.20295	0.170546	0.115587	0.144942
4-Hydroxyphenylacetic acid	HMDB0000020	0.4	1.6	3.2	0.402256	1.92539	3.16084	1.90863	1.3289	1.45357	1.5806	100.564	120.337	98.7762	119.289	83.0563	90.8484	98.7873	0.1	< LOD	< LOD	< LOD	< LOD	< LOD	< LOD	< LOD	< LOD	< LOD	0.135135	< LOD	< LOD	< LOD	< LOD	< LOD	< LOD	< LOD	< LOD	< LOD	< LOD	< LOD	< LOD	< LOD	< LOD	< LOD	< LOD	< LOD	< LOD	0.443325	0.333923
4-Hydroxyphenylpyruvic acid	HMDB0000707	7	28	56	3.995	15.8438	28.9917	21.5196	16.5739	16.2936	27.0205	57.0715	56.585	51.7709	76.8558	59.1924	58.1915	96.5017	0.283019	0.349681	< LOD	0.351737	0.400728	0.362799	0.374599	0.367637	0.367887	0.369791	0.379935	0.375106	0.372469	0.399603	0.358866	0.392184	0.386567	0.377618	0.385001	0.375681	0.382219	0.384695	0.368404	0.371443	0.41444	0.360714	0.3781	0.371569	0.38736	0.932467	1.11853
5-Aminolevulinic Acid	HMDB0001149	7	28	56	6.47313	26.7012	50.3426	27.7966	28.5954	27.3771	32.7393	92.4733	95.3613	89.8975	99.2737	102.126	97.7752	116.926	0.319797	< LOD	< LOD	< LOD	3.69733	< LOD	< LOD	< LOD	< LOD	< LOD	< LOD	< LOD	< LOD	< LOD	< LOD	< LOD	< LOD	< LOD	0.339086	< LOD	< LOD	< LOD	< LOD	< LOD	< LOD	< LOD	< LOD	< LOD	< LOD	< LOD	< LOD
5-Hydroxyindoleacetic acid	HMDB0000763	0.18	0.72	1.44	0.16669	0.652984	1.72383	0.952599	0.776907	0.698941	0.785106	92.6056	90.6923	119.71	132.305	107.904	97.0751	109.042	0.0133333	< LOD	< LOD	< LOD	0.0138152	< LOD	< LOD	< LOD	< LOD	< LOD	< LOD	< LOD	< LOD	< LOD	< LOD	< LOD	< LOD	< LOD	< LOD	< LOD	< LOD	< LOD	< LOD	< LOD	< LOD	< LOD	< LOD	< LOD	< LOD	0.0637358	0.108748
5-Oxoproline	HMDB0000267	21	84	168	20.5248	82.4896	159.249	93.4968	81.77	86.2918	96.3877	97.737	98.2019	94.7911	111.306	97.3453	102.728	114.747	0.134529	1.19881	1.14908	1.0654	16.4793	13.7833	17.4167	6.45698	10.3606	9.5064	19.5886	8.6037	11.482	18.1917	9.89716	11.8353	15.0769	13.5532	9.57702	13.3794	10.9665	13.9611	7.54989	6.96853	47.2164	4.23369	45.3476	10.0323	13.4947	94.2553	156.489
Acetoacetic acid	HMDB0000060	13.125	52.5	105	16.939	52.2462	97.9526	90.2435	78.8231	96.6256	93.8947	129.059	99.5165	93.2882	171.892	150.139	184.049	178.847	0.129723	1.04852	0.987675	0.996812	2.91977	1.82406	2.18526	1.58968	1.93648	3.49194	1.84717	1.9247	1.65654	2.54294	1.58346	2.16138	2.14132	1.67394	1.54587	2.58188	2.79784	2.31031	2.21087	2.61221	4.18661	1.58279	2.17076	2.41552	1.94335	34.1037	64.3887
alpha-Ketoglutaric acid	HMDB0000208	3.5	14	28	2.96864	12.7549	25.5034	15.2765	12.3666	13.3818	17.1236	84.8183	91.1067	91.0835	109.118	88.3332	95.5844	122.312	0.019305	0.289146	0.285764	0.284046	0.404057	0.320982	0.366786	0.327741	0.345311	0.363296	0.393717	0.363368	0.358491	0.327121	0.422934	0.340871	0.412576	0.366845	0.359879	0.361479	0.39828	0.344236	0.35187	0.350061	0.472836	0.350235	0.418375	0.380191	0.367532	7.78448	8.95119
alpha-Ketoisovaleric acid	HMDB0000019	3.15	12.6	25.2	2.66793	10.0329	20.1837	13.05	9.65887	13.3933	17.0841	84.6962	79.6262	80.0942	103.572	76.6577	106.296	135.588	0.0564854	0.186683	0.18088	0.184468	0.731308	0.718125	0.770801	0.671524	0.863981	0.863491	0.819032	0.81414	0.681384	0.539085	1.41962	0.672263	0.731296	0.692533	0.855597	0.574158	0.641598	0.740565	0.634368	0.571608	1.14519	0.526505	0.819723	0.981879	0.677923	15.5148	25.407
Argininic acid	HMDB0003148	7	28	56	10.0937	30.9791	30.0297	25.1968	27.9017	30.314	35.5891	144.195	110.64	53.6245	89.9886	99.649	108.264	127.104	0.19877	3.95973	< LOD	< LOD	< LOD	1.80072	1.69773	< LOD	0.489235	2.36007	< LOD	0.592567	< LOD	1.93147	10.5348	< LOD	0.519684	3.23467	< LOD	2.69141	2.49566	2.07347	< LOD	3.65766	10.9106	1.38531	3.8675	4.61001	5.46068	5.40493	< LOD
Benzoic acid	HMDB0001870	0.875	3.5	7	0.82762	2.94847	5.32676	3.57977	3.7094	3.16241	3.84962	94.5852	84.2421	76.0965	102.279	105.983	90.3546	109.989	0.141664	< LOD	< LOD	< LOD	5.89474	0.44909	0.595442	0.561682	0.554874	0.373578	0.459641	0.491682	0.631868	0.34912	0.710224	0.387047	0.561788	0.851998	0.442088	0.496609	0.520239	0.518604	0.335134	0.335559	1.55218	0.192305	0.795728	0.614197	0.395007	0.311984	0.311312
Butyric acid + Isobutyric acid	HMDB0000039 HMDB0001873	1.575	6.3	12.6	2.50019	6.84651	11.6214	13.9856	12.1646	13.2817	14.2449	158.742	108.675	92.2334	221.994	193.089	210.821	226.109	0.083502	< LOD	< LOD	< LOD	1.132	0.136124	1.71295	0.69911	1.92307	< LOD	< LOD	< LOD	2.25485	1.41601	3.13919	1.32554	1.49112	2.22612	0.849077	1.97992	3.06989	4.04864	1.86121	4.4327	9.73101	0.689999	3.4505	4.53605	2.28923	6.60762	7.37887
Caffeic acid	HMDB0001964	1.25	5	10	0.871635	2.79754	7.23104	4.8441	3.94239	3.3756	4.63685	69.7308	55.9509	72.3104	96.882	78.8479	67.512	92.7369	0.842798	< LOD	< LOD	< LOD	< LOD	< LOD	< LOD	< LOD	< LOD	< LOD	< LOD	< LOD	< LOD	< LOD	< LOD	< LOD	< LOD	< LOD	< LOD	< LOD	< LOD	< LOD	< LOD	< LOD	< LOD	< LOD	< LOD	< LOD	< LOD	< LOD	< LOD
Caproic acid	HMDB0000535	1.75	7	14	1.64256	6.26462	11.8271	8.11847	7.17907	7.80861	8.86558	93.8607	89.4945	84.4792	115.978	102.558	111.552	126.651	0.273359	3.47641	2.82093	2.52973	1.51568	1.14865	2.09208	1.43521	1.65963	1.57456	1.36382	1.41937	2.09531	1.62702	2.27588	1.38266	1.61744	2.39197	1.31483	1.86342	2.17511	2.09578	1.91029	1.69441	3.6144	1.10684	1.78055	2.37613	1.51151	1.2856	1.72538
Caprylic acid	HMDB0000482	0.875	3.5	7	0.853053	2.93671	5.72214	3.80458	3.12063	3.57309	3.75588	97.4918	83.906	81.7449	108.702	89.161	102.088	107.311	0.132806	0.466394	< LOD	0.171994	0.173596	< LOD	0.263044	< LOD	0.233451	0.146723	< LOD	0.156151	< LOD	< LOD	0.370537	0.144976	0.174829	0.16484	< LOD	0.290027	0.289605	0.364796	0.290836	0.363812	0.832386	0.154877	0.309234	0.418569	0.163918	0.721033	1.11768
cis-Aconitic acid	HMDB0000072	1.25	5	10	1.08468	4.04441	9.27489	5.78325	5.30249	7.70842	9.27743	86.7743	80.8882	92.7489	115.665	106.05	154.168	185.549	0.0162197	0.0694713	0.0685719	0.0705614	0.0812966	0.0737727	0.0792543	0.0733901	0.076108	0.0718923	0.0743926	0.0754001	0.0735111	0.0745833	0.074978	0.0758681	0.081951	0.0775127	0.0851655	0.0768357	0.0861774	0.0801052	0.0748349	0.0808845	0.0806609	0.0726665	0.0805786	0.0788245	0.0769321	0.558601	0.646373
Citric acid	HMDB0000094	17.5	70	140	10.5725	62.3363	131.672	70.7567	68.2508	69.8252	78.6299	60.4144	89.0519	94.0514	101.081	97.5011	99.7503	112.328	0.7043	2.91112	2.89796	2.91284	3.29205	3.04573	3.09579	2.97798	3.02827	3.01762	3.02735	3.0114	3.00096	3.0085	3.09561	3.0554	3.16153	3.07246	3.04068	3.11655	3.26963	3.03681	3.03605	3.06949	3.34041	3.05879	3.65849	3.11555	3.12504	23.9311	22.1507
Cyclic AMP	HMDB0000058	1.28	5.12	10.24	1.66951	5.4106	10.9891	7.73978	6.01113	6.30373	8.17228	130.431	105.676	107.316	151.168	117.405	123.12	159.615	0.008982	< LOD	< LOD	< LOD	0.031291	0.114011	0.0147027	< LOD	< LOD	< LOD	0.0243738	0.111875	0.20329	0.0468588	0.0333661	< LOD	0.0495269	< LOD	< LOD	< LOD	< LOD	< LOD	0.0238495	< LOD	0.0929799	0.0296104	< LOD	0.0388735	0.0859404	0.236022	0.822556
Dimethylglycine	HMDB0000092	4.375	17.5	35	4.43043	16.9756	31.0377	19.3019	15.6241	15.4191	18.5668	101.267	97.0035	88.6791	110.296	89.2806	88.1089	106.096	0.157563	< LOD	0.261328	0.19818	5.50937	4.41181	10.5457	5.13354	4.38112	3.69055	10.6468	4.07892	4.47011	6.14181	5.90458	4.58985	5.34491	6.87532	6.63688	6.4153	6.9927	5.16453	4.02616	5.2457	8.30624	3.11752	2.2356	4.02326	4.50134	39.6619	39.8184
Ethylmalonic acid	HMDB0000622	0.875	3.5	7	0.72382	2.90393	5.66819	3.35178	2.66169	3.19937	3.63745	82.7222	82.9694	80.9742	95.7652	76.0482	91.4106	103.927	0.0506757	< LOD	< LOD	< LOD	< LOD	< LOD	< LOD	< LOD	< LOD	< LOD	< LOD	0.0572092	< LOD	< LOD	< LOD	< LOD	< LOD	< LOD	< LOD	0.0516258	< LOD	< LOD	< LOD	< LOD	0.056289	< LOD	< LOD	< LOD	< LOD	0.218771	0.324717
Fumaric acid	HMDB0000134	0.875	3.5	7	0.78904	2.82774	5.49196	3.71555	2.98973	3.38642	3.90702	90.176	80.7926	78.4566	106.159	85.4208	96.7548	111.629	0.0235752	0.0578535	0.0609245	0.0409019	0.128239	0.101452	0.112047	0.0715574	0.0807263	0.0782351	0.0966428	0.112637	0.0882905	0.0829526	0.102795	0.0875209	0.114748	0.107089	0.123896	0.101361	0.0907431	0.10332	0.0507709	0.0818401	0.153271	0.0511606	0.144744	0.107947	0.117054	0.800646	0.944425
Glutaric acid	HMDB0000661	0.5	2	4	0.579463	2.5253	4.76136	2.69138	2.40867	2.30944	2.71809	115.893	126.265	119.034	134.569	120.433	115.472	135.905	0.00477099	0.0552041	0.0214557	< LOD	0.178865	0.0248696	0.0380565	0.021516	0.0382991	0.0274725	0.0277593	0.037321	0.0370889	0.0317479	0.0660487	0.0437377	0.0449944	0.041552	0.034456	0.0309957	0.0378458	0.0462314	< LOD	0.0332298	0.094813	0.0149749	0.07925	0.0521184	0.0391243	0.0888335	0.087882
Glyceric acid	HMDB0000139	1.2	4.8	9.6	1.05085	4.16063	8.28524	5.25952	4.37311	4.74144	4.89534	87.571	86.6799	86.3046	109.573	91.1064	98.7801	101.986	0.00841121	0.559642	0.480166	0.407438	0.633388	0.571712	0.501194	0.462093	0.619571	0.557607	0.555599	0.552186	0.589237	0.589587	0.7041	0.47371	0.576016	0.629421	0.675307	0.515077	0.54366	0.475293	0.406713	0.531579	0.938063	0.343718	0.717395	0.565778	0.481627	4.11411	5.28542
Guanidinopropionic acid	HMDB0013222	7	28	56	5.01439	25.3319	48.0356	31.0681	25.6384	26.5258	32.1574	71.6342	90.4712	85.7779	110.958	91.5658	94.735	114.848	0.105	0.784341	< LOD	0.777668	11.2387	18.0257	14.5378	7.39859	9.77072	15.1911	17.2292	13.5072	15.8833	14.6065	15.2463	16.693	13.9736	20.9191	14.5993	10.9143	21.7486	15.6274	8.22747	13.6673	26.0136	6.52427	11.254	10.5098	8.58736	11.627	20.8287
Guanidoacetic acid	HMDB0000128	3.5	14	28	3.75801	12.056	18.999	13.5179	8.94725	16.8331	18.053	107.372	86.1144	67.8537	96.5564	63.909	120.237	128.95	0.135135	0.367558	< LOD	0.337925	0.474396	0.514688	0.493305	0.509279	0.477724	0.419632	0.511084	0.515406	0.453723	0.499471	0.520531	0.466045	0.520202	0.453827	0.500364	0.402762	0.459003	0.528675	0.369063	0.363094	0.48489	0.43105	0.420714	0.389576	0.449203	2.33488	2.01502
Hippuric acid	HMDB0000714	3.5	14	28	3.29786	12.7053	24.3841	14.504	11.0683	12.9061	15.4377	94.2245	90.7524	87.086	103.6	79.0594	92.1868	110.27	0.0326797	0.163013	0.151027	0.153733	0.689529	0.471897	0.31939	0.244991	1.47242	0.298884	0.221256	0.405895	0.235818	0.32482	0.609405	0.452571	0.671035	0.507552	2.72293	0.496062	2.37772	0.358896	0.397477	0.60647	1.12576	0.178695	0.323423	0.428023	0.531468	8.78417	> ULOQ
Homovanillic acid	HMDB0000118	0.1	0.4	0.8	0.0884257	0.31803	0.529412	0.395435	0.361806	0.309343	0.442716	88.4257	79.5076	66.1765	98.8588	90.4515	77.3357	110.679	0.0520833	< LOD	< LOD	< LOD	< LOD	< LOD	< LOD	< LOD	< LOD	< LOD	< LOD	< LOD	< LOD	< LOD	< LOD	< LOD	< LOD	< LOD	< LOD	< LOD	< LOD	< LOD	< LOD	< LOD	< LOD	< LOD	< LOD	< LOD	< LOD	0.0955859	< LOD
Indole-3-carboxylic acid	HMDB0003320	4.5	18	36	3.25509	14.8698	35.5782	16.9462	14.3992	19.6542	20.2687	72.3354	82.61	98.8284	94.1457	79.9953	109.19	112.604	0.0697674	0.173085	0.179153	0.175686	0.202673	0.177385	0.199743	0.208814	0.215773	0.229275	0.194631	0.218382	0.239614	0.201158	0.241964	0.222315	0.211493	0.210912	0.205477	0.200919	0.221199	0.198195	0.239673	0.196604	0.192675	0.224413	0.215971	0.221967	0.208323	0.206682	0.23817
Indole-3-propionic acid	HMDB0002302	0.5	2	4	0.462907	1.80566	3.63607	2.16399	1.70503	1.81184	2.11585	92.5814	90.283	90.9018	108.2	85.2516	90.5921	105.793	0.00880282	0.0208761	0.0209908	0.0212338	0.0484466	0.0458415	0.0311568	0.022036	0.0600348	0.0759763	0.03335	0.0525132	0.0306104	0.0254782	0.0565732	0.0241738	0.046788	0.0313755	0.118129	0.0602421	0.0749361	0.0471698	0.0529267	0.0378971	0.140099	0.0282887	0.0372902	0.0463163	0.0446872	0.87287	1.9066
Indolelactic acid	HMDB0000671	0.3375	1.35	2.7	0.275595	1.21336	2.56061	1.39086	1.12804	1.04509	1.29281	81.6577	89.8787	94.8373	103.026	83.5583	77.414	95.7636	0.0125	< LOD	0.0184	0.0171387	0.046576	0.0440078	0.0583232	0.033083	0.0522229	0.0305554	0.0442033	0.0432879	0.0449959	0.0361156	0.0420993	0.0500342	0.0426783	0.0329078	0.0500055	0.0306713	0.0523611	0.0558426	0.0312471	0.0497406	0.0596195	0.0229227	0.0428386	0.0487833	0.0377315	0.744362	1.06061
Indoxyl glucoside	HMDB0253456	6.4	25.6	51.2	9.98973	33.9378	54.6293	33.8144	31.3584	31.2005	40.6338	156.09	132.569	106.698	132.087	122.494	121.877	158.726	0.322581	< LOD	< LOD	< LOD	< LOD	< LOD	< LOD	< LOD	< LOD	< LOD	< LOD	< LOD	< LOD	< LOD	< LOD	< LOD	< LOD	< LOD	< LOD	< LOD	< LOD	< LOD	< LOD	< LOD	< LOD	< LOD	< LOD	< LOD	< LOD	< LOD	< LOD
Indoxyl glucuronide	HMDB0010319	0.875	3.5	7	0.814945	3.08711	6.01096	3.69397	2.82805	3.32017	3.85817	93.1366	88.203	85.8709	105.542	80.8014	94.862	110.233	0.0375	0.0385141	0.0402953	0.0401306	0.0395037	0.0385141	0.0385141	0.0412922	0.040422	0.0385141	0.0385141	0.0393533	0.0385141	0.0385141	0.0385141	0.0385141	0.0385141	0.0385141	0.0385141	0.0385141	0.0394155	0.0413307	0.039972	0.0413925	0.0385141	0.0385141	0.0405338	0.0395511	0.0403133	0.0520256	0.0629528
Indoxyl sulfate	HMDB0000682	2.4	9.6	19.2	4.17895	10.5139	19.2657	12.587	8.0627	11.3273	12.2664	174.123	109.519	100.342	131.115	83.9865	117.992	127.775	0.219624	< LOD	< LOD	< LOD	< LOD	< LOD	< LOD	< LOD	< LOD	< LOD	< LOD	< LOD	< LOD	< LOD	< LOD	< LOD	< LOD	< LOD	< LOD	< LOD	< LOD	< LOD	< LOD	< LOD	< LOD	< LOD	< LOD	< LOD	< LOD	5.99345	10.1723
Isocitric acid	HMDB0000193	1.25	5	10	< LOD	4.28851	9.25568	4.5808	4.24399	4.79426	6.07303	65.9074	85.7701	92.5568	91.6161	84.8798	95.8852	121.461	1.53844	< LOD	< LOD	< LOD	< LOD	< LOD	< LOD	< LOD	< LOD	< LOD	< LOD	< LOD	< LOD	< LOD	< LOD	< LOD	< LOD	< LOD	< LOD	< LOD	< LOD	< LOD	< LOD	< LOD	< LOD	< LOD	< LOD	< LOD	< LOD	< LOD	< LOD
Isovaleric acid	HMDB0000718	4.2	16.8	33.6	3.16391	20.1571	26.8995	30.5735	8.89038	6.86489	10.1114	75.3311	119.983	80.0581	181.985	52.919	40.8624	60.1867	0.0611427	2.05828	< LOD	< LOD	7.28031	17.3817	17.3529	5.82326	17.2478	15.62	3.01874	8.20706	16.7539	13.8591	21.5768	5.1405	11.5933	16.4027	4.00966	32.0514	33.6397	32.0021	17.5954	26.8701	> ULOQ	15.6724	12.7173	11.8244	4.51143	5.66041	7.23067
Kynurenic acid	HMDB0000715	0.5	2	4	0.398506	1.78242	3.60332	2.22829	1.65609	1.73847	2.14587	79.7011	89.1209	90.0831	111.414	82.8045	86.9234	107.293	0.00699627	0.0269494	0.0261026	0.025848	0.0317598	0.0317505	0.0279563	0.0283436	0.0307319	0.028497	0.0294486	0.0284	0.0277992	0.0291809	0.0275021	0.0304858	0.0283127	0.026293	0.0263389	0.0280733	0.0292342	0.0347906	0.0296307	0.0285821	0.0301524	0.0270633	0.0519054	0.030677	0.0314412	0.0766304	0.0908272
Lactic acid	HMDB0000190	700	2800	5600	662.564	2443.45	4891.98	2834.48	2409.22	2510.16	2844.7	94.6519	87.2659	87.3567	101.231	86.0435	89.6485	101.596	1.99734	32.5657	31.9361	31.6133	196.209	214.861	210.844	88.9409	189.249	133.043	215.57	125.256	139.182	141.361	196.783	99.9031	172.935	166.825	179.905	130.652	133.027	159.854	110.313	83.2299	392.224	60.6882	660.599	192.894	146.656	2016.85	2623.11
Maleic acid	HMDB0000176	0.875	3.5	7	0.699867	2.77239	5.13557	3.40264	2.85395	3.42171	4.02877	79.9848	79.2112	73.3652	97.2182	81.5413	97.7631	115.108	0.125	< LOD	< LOD	< LOD	< LOD	< LOD	< LOD	< LOD	< LOD	< LOD	< LOD	< LOD	< LOD	< LOD	< LOD	< LOD	< LOD	< LOD	< LOD	< LOD	< LOD	< LOD	< LOD	< LOD	< LOD	< LOD	< LOD	< LOD	< LOD	< LOD	< LOD
Malic acid	HMDB0000156	3.5	14	28	2.90999	13.0937	24.9015	14.4422	12.4952	12.9756	16.1427	83.1427	93.5267	88.9338	103.158	89.2511	92.6831	115.305	0.0225097	0.412881	0.374361	0.390229	0.57296	0.326096	0.395944	0.295725	0.344527	0.352562	0.396558	0.356087	0.378421	0.335451	0.417379	0.391465	0.433869	0.389259	0.410229	0.409579	0.395434	0.419344	0.308793	0.317285	0.638604	0.307121	0.560064	0.416975	0.390101	2.02312	2.40327
Malonic acid	HMDB0000691	0.75	3	6	0.608817	2.52599	5.03148	3.00104	2.57282	3.05316	3.46089	81.1756	84.1998	83.8581	100.035	85.7605	101.772	115.363	0.0182396	0.0781096	< LOD	< LOD	0.403892	0.0583567	0.102212	0.0730807	0.115928	0.0870207	0.0887968	0.0912516	0.116751	0.0803767	0.157239	0.102368	0.116204	0.130877	0.155974	0.118487	0.115917	0.164432	0.0273466	0.0870993	0.304116	< LOD	0.124793	0.161064	0.108395	0.210068	0.224799
Methylmalonic acid	HMDB0000202	0.45	1.8	3.6	0.297239	1.50069	3.18026	2.0163	1.38821	1.80419	2.0881	66.053	83.3719	88.3407	112.017	77.1228	100.233	116.005	0.0125	< LOD	< LOD	< LOD	0.066629	0.0155771	< LOD	< LOD	0.0229648	< LOD	< LOD	0.0319784	0.0212079	0.0170193	0.0302356	< LOD	0.0173758	0.0384316	0.0285515	0.0381563	0.0294644	< LOD	0.0230814	0.024419	0.10678	< LOD	0.0210678	0.020176	0.0144866	0.102656	0.133594
N-Acetyl-Alanine	HMDB0000766	0.875	3.5	7	0.752181	3.24051	6.11592	3.66705	3.19767	3.09382	3.57397	85.9636	92.5861	87.3703	104.773	91.3619	88.3949	102.114	0.0315126	0.0338654	< LOD	0.0320305	0.18118	0.145648	0.182796	0.114198	0.160196	0.151802	0.175624	0.134215	0.127535	0.146423	0.145324	0.136269	0.126502	0.166886	0.142761	0.115899	0.148276	0.151964	0.12647	0.0998535	0.236405	0.0776704	0.190035	0.155933	0.138797	1.6222	1.89829
N-Acetyl-Arginine	HMDB0004620	3.5	14	28	2.45789	9.66578	25.1701	15.7341	9.21698	12.7544	16.4107	70.2255	69.0413	89.8932	112.386	65.8356	91.1026	117.219	0.340909	< LOD	< LOD	< LOD	< LOD	< LOD	< LOD	< LOD	< LOD	< LOD	< LOD	< LOD	< LOD	< LOD	0.361405	< LOD	< LOD	< LOD	< LOD	< LOD	< LOD	0.441417	< LOD	< LOD	< LOD	< LOD	< LOD	< LOD	< LOD	< LOD	< LOD
N-Acetyl-Asparagine	HMDB0006028	0.5	2	4	0.490554	1.70064	3.36669	2.26326	1.70132	2.07591	2.09746	98.1108	85.0319	84.1673	113.163	85.0658	103.795	104.873	0.05	< LOD	< LOD	< LOD	0.167171	< LOD	< LOD	< LOD	< LOD	< LOD	< LOD	< LOD	< LOD	< LOD	< LOD	< LOD	< LOD	< LOD	< LOD	< LOD	< LOD	< LOD	< LOD	< LOD	< LOD	< LOD	< LOD	< LOD	< LOD	0.347177	0.106388
N-Acetyl-Aspartic acid	HMDB0000812	0.5	2	4	0.461283	1.88199	3.39474	2.4399	1.87101	1.99607	2.27685	92.2565	94.0994	84.8685	121.995	93.5503	99.8033	113.843	0.0075	< LOD	0.0108475	0.00778537	0.0585733	0.0204836	0.0245475	0.0273538	0.0322934	0.0209858	0.0219222	0.0213542	0.0318233	0.0128577	0.0138402	0.0158458	0.037072	0.024252	0.0220372	0.0198378	0.0239941	0.0236499	0.0139375	0.0283178	0.0314306	< LOD	0.0552294	0.0513395	0.0363104	1.1591	1.58944
N-Acetyl-Glutamic acid	HMDB0001138	0.5625	2.25	4.5	0.536297	1.94437	4.34904	2.55056	2.329	2.18882	2.57696	95.3416	86.4162	96.6454	113.358	103.511	97.2809	114.532	0.015	0.0228035	0.0231677	0.0222954	0.0269735	0.0237873	0.0246095	0.0230645	0.0232307	0.0245053	0.0231515	0.0231345	0.0241272	0.0228826	0.02357	0.0231434	0.0262066	0.0247163	0.0235765	0.0264198	0.0278138	0.0238599	0.0236976	0.0293298	0.0272186	0.0230246	0.0327653	0.0248006	0.0251544	0.0775064	0.122222
N-Acetyl-Glutamine	HMDB0006029	4	16	32	3.11431	14.7639	25.8637	15.77	17.5777	15.5162	16.3921	77.8578	92.2746	80.824	98.5625	109.861	96.9761	102.451	0.220588	0.266493	0.257322	0.254187	0.330031	0.254063	0.30184	0.256329	0.269569	0.255797	0.291606	0.281422	0.267652	0.279097	0.280089	0.271167	0.260972	0.268983	0.262137	0.263853	0.265306	0.28294	0.259708	0.261187	0.339015	0.281149	0.327319	0.297695	0.276742	0.4599	0.501473
N-Acetyl-Glycine	HMDB0000532	3.5	14	28	2.94593	12.7753	25.2839	14.8184	12.9675	13.118	15.9303	84.1694	91.2522	90.2996	105.846	92.6253	93.7002	113.788	0.0604839	0.155832	0.150182	0.147456	0.298	0.321503	0.27096	0.2382	0.261543	0.268368	0.310562	0.286306	0.256704	0.244503	0.238169	0.284524	0.267684	0.260065	0.21314	0.27665	0.251469	0.293298	0.204065	0.201427	0.320855	0.179753	0.262974	0.250072	0.22944	1.64138	1.76674
N-Acetyl-Histidine	HMDB0032055	17.5	70	140	16.346	67.0044	126.372	75.1731	60.1352	65.3804	85.3146	93.4057	95.7206	90.2654	107.39	85.9075	93.4006	121.878	0.384615	< LOD	< LOD	< LOD	2.36988	1.76833	2.46687	1.59941	1.49451	1.76869	2.63872	3.38186	3.22499	3.37391	4.092	1.16633	1.20239	3.19113	1.27146	1.16539	2.93699	2.10141	2.24973	0.910111	1.82528	0.433519	1.08362	< LOD	2.65871	27.4488	46.57
N-Acetyl-Isoleucine	HMDB0061684	0.875	3.5	7	0.708494	1.4791	6.22027	3.23803	1.32925	1.44021	1.6323	80.9707	42.2601	88.861	92.5151	37.9786	41.1488	46.6371	0.02	0.101758	0.0981528	0.100025	0.117635	0.10768	0.0986366	0.0986013	0.109403	0.111267	0.103626	0.105892	0.104828	0.101022	0.111278	0.0983622	0.10256	0.106512	0.117525	0.107444	0.0983801	0.102052	0.096376	0.0963165	0.11669	0.0965616	0.0988428	0.102648	0.104949	0.143568	0.159922
N-Acetyl-Leucine	HMDB0011756	0.875	3.5	7	0.779995	1.83036	6.55869	2.14449	3.37352	1.8445	2.15816	89.1423	52.2959	93.6955	61.2712	96.3862	52.7	61.6616	0.0797872	< LOD	< LOD	< LOD	< LOD	< LOD	< LOD	< LOD	< LOD	< LOD	< LOD	< LOD	< LOD	< LOD	< LOD	< LOD	< LOD	< LOD	< LOD	< LOD	< LOD	< LOD	< LOD	< LOD	< LOD	< LOD	< LOD	< LOD	< LOD	< LOD	< LOD
N-Acetyl-Methionine	HMDB0011745	0.875	3.5	7	0.791963	3.07861	6.23867	3.5142	3.0824	3.64671	3.79313	90.51	87.9602	89.1238	100.406	88.0684	104.192	108.375	0.0189394	0.0595218	0.0568211	0.0600068	0.0673566	0.0920985	0.0723655	0.0632517	0.0585037	0.0781296	0.0806219	0.0575553	0.0567161	0.0657774	0.0643958	0.0573971	0.0741406	0.0675026	0.0762318	0.061856	0.0547036	0.0669638	0.05345	0.0993778	0.05345	0.0708854	0.060255	0.0671935	0.0677456	0.073541	0.0808811
N-Acetyl-Proline	HMDB0094701	0.5625	2.25	4.5	0.458722	2.42734	4.39046	2.53907	1.87256	2.27294	2.5838	81.5507	107.882	97.5659	112.848	83.2248	101.02	114.836	0.0131119	< LOD	< LOD	< LOD	0.0398021	0.0214829	0.0260708	0.0175495	0.0275699	0.0182686	0.0253096	0.0191552	0.0168318	0.0258924	0.0206379	0.0182274	0.0214031	0.0350106	0.0192978	0.0182891	0.0232278	0.0235109	0.0205313	0.0234513	0.0289855	0.01625	0.0215385	0.0283588	0.023851	0.207971	0.388899
N-Acetyl-Serine	HMDB0002931	0.875	3.5	7	0.73244	3.12305	5.38722	3.73317	3.05791	3.25793	3.58258	83.7074	89.2301	76.9602	106.662	87.369	93.0836	102.359	0.028626	0.0394199	0.0381222	0.0364202	0.171539	0.0878568	0.224464	0.0678264	0.132679	0.100254	0.256793	0.103624	0.0943727	0.261874	0.0974256	0.108061	0.170782	0.180905	0.0987996	0.224259	0.117477	0.138353	0.106191	0.0898411	0.684713	0.05805	0.629961	0.0966196	0.157231	0.722199	0.909496
N-Acetyl-Tryptophan	HMDB0013713	0.875	3.5	7	0.936058	3.63362	7.67477	4.42028	4.3737	4.19609	5.39985	106.978	103.818	109.64	126.294	124.963	119.888	154.281	0.05	< LOD	0.363883	< LOD	0.625076	0.492196	0.43798	0.191179	0.512128	0.799558	0.501551	0.428789	0.274764	0.45862	0.308932	0.374364	0.606555	0.765422	1.54818	0.344768	0.712579	0.832099	0.440492	1.16777	1.48902	0.105768	0.932848	0.530512	0.383747	4.86552	7.73417
N-Acetyl-Tyrosine	HMDB0000866	0.5625	2.25	4.5	0.521345	1.92919	4.11693	2.45225	1.90771	2.15056	2.48024	92.6836	85.7418	91.4873	108.989	84.787	95.5803	110.233	0.0694444	< LOD	< LOD	< LOD	< LOD	< LOD	< LOD	< LOD	< LOD	< LOD	< LOD	< LOD	< LOD	< LOD	< LOD	< LOD	< LOD	< LOD	< LOD	< LOD	< LOD	< LOD	< LOD	< LOD	< LOD	< LOD	< LOD	< LOD	< LOD	0.0844274	0.0879074
N-Acetyl-Valine	HMDB0011757	0.5625	2.25	4.5	0.482473	2.00976	4.26948	2.50112	1.85781	2.09204	2.37525	85.773	89.3227	94.8774	111.161	82.5695	92.9795	105.566	0.0347222	< LOD	< LOD	< LOD	< LOD	< LOD	< LOD	< LOD	< LOD	< LOD	< LOD	< LOD	< LOD	< LOD	< LOD	< LOD	< LOD	< LOD	0.034982	< LOD	< LOD	< LOD	< LOD	< LOD	0.0356964	< LOD	< LOD	< LOD	< LOD	0.0672234	0.0812429
N-Methyl-Aspartic acid	HMDB0002393	8.75	35	70	6.25935	27.7473	48.6993	33.4716	26.3538	30.009	30.8468	71.5354	79.2779	69.5705	95.6332	75.2965	85.74	88.1337	0.357143	0.608539	0.598341	0.562923	0.564639	0.621535	0.672457	0.599119	0.537959	0.561657	0.636561	0.549514	0.542038	0.608588	0.582372	0.566959	0.545707	0.607856	0.567641	0.63901	0.632811	0.577631	0.597717	0.563271	0.72101	0.553075	0.620898	0.587016	0.616827	0.747324	0.833847
N1-Acetyl-Lysine	HMDB0000446	3.5	14	28	2.46578	11.6259	18.5362	12.205	12.5052	10.5952	12.5694	70.4509	83.0422	66.2008	87.1785	89.3229	75.6798	89.7811	0.06	0.0930253	< LOD	< LOD	< LOD	0.11203	0.123874	0.10196	0.131623	0.108025	< LOD	< LOD	< LOD	0.0650814	0.13534	< LOD	< LOD	< LOD	0.105343	< LOD	< LOD	< LOD	0.158815	0.142997	0.0661541	< LOD	0.0957124	0.0805042	< LOD	1.09836	0.840466
N1-Acetyl-Lysine + N6-Acetyl-Lysine	HMDB0000446 HMDB0000206	7	28	56	5.45563	31.6669	53.0749	33.9321	28.2478	26.8619	34.714	77.9375	113.096	94.7766	121.186	100.885	95.9355	123.979	0.0625	0.437938	0.278262	0.211483	0.609013	0.104292	0.112581	0.320782	0.255315	0.271315	0.382884	0.166372	0.149363	0.10882	0.427944	0.133502	0.382091	0.132257	0.176392	0.24552	0.176591	0.224617	0.0680211	0.18823	0.38456	0.201652	1.64218	0.205874	0.22813	5.92753	0.266256
Orotic acid	HMDB0000226	2.25	9	18	1.53491	5.98666	10.8938	6.65525	5.91464	5.35122	7.23103	68.2182	66.5184	60.521	73.9472	65.7182	59.458	80.3448	0.0570101	0.127317	0.122025	0.128892	0.137046	0.124226	0.128338	0.131776	0.131052	0.124491	0.145783	0.131985	0.128037	0.130836	0.128057	0.140239	0.13124	0.132064	0.129353	0.126306	0.124923	0.129398	0.127916	0.129526	0.136115	0.126244	0.127174	0.127468	0.130409	0.158817	0.160446
p-Cresol sulfate	HMDB0011635	128	512	1024	171.331	599.809	1145	669.268	557.712	631.817	35.8792	133.852	117.15	111.816	130.716	108.928	123.402	7.00766	0.435	3.37572	3.36491	3.37277	3.96995	3.78017	3.96841	3.67177	4.37673	3.63977	4.33127	3.72225	3.65317	3.91337	3.69362	3.57803	4.01932	4.59047	5.00728	3.79559	4.47318	4.49007	3.89416	4.09237	4.29924	3.5532	4.94698	3.7402	3.66043	18.3157	26.4779
p-Hydroxyhippuric acid	HMDB0013678	0.8	3.2	6.4	0.741282	2.96733	6.1436	3.64594	2.84586	2.91998	3.32553	92.6602	92.729	95.9938	113.936	88.9331	91.2493	103.923	0.0348837	0.0399743	0.0386168	0.0384665	0.046901	0.0448908	0.0512555	0.0413043	0.0435051	0.0435139	0.0450669	0.0408915	0.0456506	0.0455736	0.0462799	0.044383	0.0457247	0.0914301	0.0493914	0.0404398	0.0635595	0.0422733	0.0442759	0.0434994	0.0476279	0.0403685	0.044916	0.0429148	0.0485285	0.142484	0.274182
Phenylacetic acid	HMDB0000209	1.25	5	10	1.21544	4.78734	8.87629	5.59331	4.40198	4.7284	5.46131	97.2354	95.7468	88.7629	111.866	88.0395	94.5679	109.226	0.0232054	0.0531286	0.0534646	0.0504643	0.099843	0.0802239	0.120756	0.0623832	0.097303	0.0637737	0.148659	0.0892108	0.0722446	0.121936	0.0792187	0.0860099	0.0818547	0.102173	0.112938	0.0719813	0.0765263	0.10291	0.0748616	0.0823944	0.107791	0.0778108	0.124975	0.0614297	0.0745484	0.678092	0.471283
Phenylacetylglutamine	HMDB0006344	0.5	2	4	0.409476	1.6866	3.88152	2.3069	1.84078	2.24378	2.62106	81.8953	84.3303	97.038	115.345	92.039	112.189	131.053	0.0125	0.0195538	0.0172666	< LOD	0.147938	0.0589915	0.197365	0.0385303	0.163617	0.0759685	0.34141	0.108197	0.0806348	0.19436	0.0376966	0.0961596	0.113439	0.15533	0.31877	0.0869938	0.160522	0.182926	0.0990911	0.16862	0.0890879	0.071099	0.221316	0.112497	0.0845606	2.63431	2.38852
Picolinic acid	HMDB0002243	4.2	16.8	33.6	3.92293	15.2592	28.8511	17.3031	14.3976	17.9705	18.0781	93.4031	90.8286	85.8664	102.994	85.6999	106.967	107.608	0.0718976	0.113245	0.121711	0.110921	0.15088	0.0988917	0.139435	0.180333	0.101213	0.123942	0.182114	0.163659	0.0963052	0.110216	0.120299	0.197965	0.1914	0.125854	0.237224	0.113611	0.111956	0.102102	0.138368	0.117593	0.111633	0.141646	0.114552	0.130774	0.154643	0.158376	0.286746
Pipecolic acid	HMDB0000070	1.28	5.12	10.24	1.03301	4.23429	8.79191	5.06647	4.19653	4.4967	5.00846	80.7042	82.701	85.8585	98.9545	81.9635	87.8262	97.8215	0.0527473	< LOD	< LOD	< LOD	0.86431	0.684182	0.896815	0.360232	0.546033	0.519013	1.00664	0.488468	0.559613	1.04268	0.492917	0.602032	0.810556	0.712098	0.464337	0.695834	0.57265	0.7037	0.421631	0.373792	2.45936	0.219659	2.3372	0.527999	0.626349	4.50725	8.31795
Propionic acid	HMDB0000237	0.875	3.5	7	< LOD	1.84607	< LOD	2.8875	< LOD	< LOD	0.622576	4.28132	52.7448	0	82.5001	-20.5302	-28.9062	17.7879	0.0573236	< LOD	< LOD	< LOD	< LOD	< LOD	< LOD	< LOD	< LOD	< LOD	< LOD	< LOD	< LOD	< LOD	< LOD	< LOD	< LOD	< LOD	< LOD	< LOD	< LOD	< LOD	< LOD	< LOD	2.2336	< LOD	< LOD	< LOD	< LOD	0.319835	0.924299
Pyruvic acid	HMDB0000243	17.5	70	140	13.9042	55.366	107.949	67.9667	55.7939	65.3917	79.9361	79.4523	79.0943	77.1062	97.0952	79.7056	93.4167	114.195	0.19481	1.84147	0.301851	< LOD	2.49234	1.86766	2.63761	1.48529	2.13524	1.74911	2.88872	2.10091	2.04356	1.66645	3.59199	1.72357	2.453	2.82178	2.32992	2.0084	2.00788	2.13482	1.23842	1.96296	9.99207	0.830111	9.37583	2.92844	2.30712	96.3834	140.014
Quinaldic acid	HMDB0000842	3.5	14	28	3.058	11.5633	24.2895	15.5626	11.6289	12.5665	15.008	87.3715	82.595	86.7482	111.162	83.0637	89.7606	107.2	0.12	< LOD	< LOD	< LOD	< LOD	< LOD	< LOD	< LOD	< LOD	< LOD	< LOD	< LOD	< LOD	< LOD	< LOD	< LOD	< LOD	< LOD	< LOD	< LOD	< LOD	< LOD	< LOD	< LOD	0.129814	< LOD	< LOD	< LOD	< LOD	0.132355	< LOD
Quinoline-4-carboxylic acid	HMDB0257047	1.75	7	14	1.65117	5.6438	11.6024	6.57807	5.41264	7.40108	6.98943	94.3528	80.6258	82.8742	93.9725	77.3234	105.73	99.8489	0.00994695	0.0733136	0.0755991	0.0955488	0.0953352	0.0468644	0.0530639	0.0939027	0.0397262	0.0531256	0.0952168	0.0503536	0.0448771	0.0433227	0.0408096	0.0918943	0.0739226	0.0458163	0.0613819	0.0435696	0.0496903	0.0462176	0.053375	0.0469579	0.0477984	0.0512813	0.0520263	0.0492324	0.0459779	0.0655779	0.16967
Quinolinic acid	HMDB0000232	0.5	2	4	0.433907	1.85289	3.76976	2.26395	2.00119	2.02617	2.28972	86.7815	92.6445	94.244	113.197	100.06	101.308	114.486	0.00986842	0.0248719	0.0245365	0.0247895	0.0298887	0.0265272	0.0272211	0.0252238	0.0262471	0.0246172	0.0274703	0.0244062	0.0366886	0.0289018	0.0282378	0.0278247	0.0265361	0.0260107	0.0273594	0.028767	0.0271071	0.0280703	0.0260406	0.0274672	0.0303461	0.0248292	0.0273792	0.0262808	0.0270478	0.278537	0.413994
Salicylic acid	HMDB0001895	3.5	14	28	2.81746	11.1679	23.4124	13.3009	10.2052	12.7745	15.6415	80.4988	79.7708	83.6159	95.0067	72.894	91.2463	111.725	0.0967742	0.217146	0.22317	0.230891	0.28019	0.27925	0.306149	0.24125	0.258861	0.267622	0.320132	0.225413	0.223224	0.246366	0.213882	0.256028	0.254248	0.361338	0.246273	0.263101	0.243879	0.27042	0.270255	0.238641	1.00686	0.259941	0.215505	0.246942	0.222836	1.24482	0.355825
Shikimic acid	HMDB0003070	1.6	6.4	12.8	0.72902	4.85134	6.35661	9.77335	4.07417	8.92338	7.26257	45.5637	75.8021	49.661	152.709	63.6589	139.428	113.478	0.137931	1.39254	2.42263	0.94232	8.001	2.07018	2.50368	10.5825	6.61046	4.22947	0.646503	6.10966	2.73117	0.604952	3.93599	3.30384	5.34157	6.64185	0.471085	3.58521	6.26253	8.74503	13.3784	37.2053	12.0166	4.07915	17.0738	4.41767	1.75735	3.65808	1.633
Succinic acid	HMDB0000254	7	28	56	5.8795	23.5087	49.5041	30.7704	23.5041	26.5982	28.6783	83.9929	83.9598	88.4002	109.894	83.9431	94.9937	102.423	0.166862	0.493425	0.275766	0.232517	1.90846	0.330811	0.44235	0.315974	0.36792	0.380035	0.46068	0.466048	0.376169	0.397096	0.534558	0.360966	0.465224	0.406798	0.383635	0.494526	0.496079	0.544873	0.302881	0.391381	0.898597	0.259062	0.923356	0.556378	0.492528	2.79253	3.00638
Tartaric acid	HMDB0000956	0.45	1.8	3.6	0.357121	1.85294	2.88121	1.94369	1.7078	1.93666	2.24166	79.3602	102.941	80.0336	107.983	94.8776	107.592	124.537	0.0375	< LOD	< LOD	< LOD	0.443258	< LOD	< LOD	< LOD	< LOD	< LOD	< LOD	< LOD	< LOD	< LOD	< LOD	< LOD	< LOD	< LOD	< LOD	< LOD	0.0664169	< LOD	< LOD	< LOD	< LOD	< LOD	< LOD	< LOD	< LOD	0.0649659	0.576768
Threonic acid	HMDB0000943	8.4	33.6	67.2	7.8043	29.965	60.3895	38.4753	29.461	32.0508	40.3261	92.9083	89.1817	89.8654	114.51	87.6816	95.3894	120.018	0.584416	< LOD	0.585268	< LOD	2.56758	1.97114	2.38449	1.38874	2.48495	2.11009	2.50626	2.07455	2.02165	1.94702	2.12304	1.93518	2.50276	2.52698	2.0416	2.60282	2.6452	2.46424	1.62098	1.87623	3.30185	1.02411	1.91885	2.2074	2.11448	7.5831	13.3383
Tiglylglycine	HMDB0000959	0.8	3.2	6.4	0.726984	2.80675	5.27235	3.6141	2.97135	3.00462	3.47253	90.873	87.711	82.3804	112.941	92.8546	93.8944	108.516	0.003	0.0407992	0.0378503	0.0406103	0.0388083	0.0397145	0.0391982	0.0387621	0.0429446	0.0418867	0.0389013	0.0405809	0.0383524	0.0415753	0.0394624	0.0407342	0.0389372	0.0386216	0.0387326	0.0374625	0.0386758	0.043412	0.0395633	0.0406165	0.0405537	0.0383633	0.037921	0.0418133	0.0406854	0.0607703	0.0471497
Uric acid	HMDB0000289	125	500	1000	186.277	1682.58	1149.17	756.829	650.525	668.492	726.69	149.021	336.515	114.917	151.366	130.105	133.698	145.338	2.92777	6.35937	5.44266	5.44089	19.2003	8.66798	14.9888	8.54897	9.1027	9.7309	9.05045	14.7381	16.3947	6.70403	10.1113	19.2695	17.9956	5.46416	18.7484	15.3224	69.7188	16.0294	12.3148	14.8245	12.7366	7.76448	12.0947	15.3808	15.4851	464.269	1586.37
Valeric acid	HMDB0000892	0.875	3.5	7	0.799402	3.40988	7.53596	5.68157	1.28845	1.34827	1.79408	91.3603	97.4252	107.657	162.331	36.8128	38.5221	51.2596	0.111607	0.369189	< LOD	< LOD	1.26883	2.29375	3.06525	0.758733	3.40647	2.15899	0.606893	1.58249	4.51749	2.4886	4.74532	1.62977	1.74082	3.30135	1.09355	5.61001	5.33472	7.11714	3.33625	5.22035	6.35641	3.03856	5.27419	1.60542	0.66684	2.63838	3.32893
Xanthine	HMDB0000292	3.2	12.8	25.6	3.86715	46.7824	25.7315	14.6553	13.0917	14.8666	16.6779	120.848	365.488	100.514	114.494	102.279	116.146	130.296	0.416667	< LOD	< LOD	< LOD	< LOD	< LOD	< LOD	< LOD	< LOD	< LOD	< LOD	< LOD	< LOD	< LOD	< LOD	< LOD	< LOD	< LOD	< LOD	< LOD	< LOD	< LOD	< LOD	< LOD	0.545016	< LOD	< LOD	< LOD	< LOD	1.44555	5.19839
Xanthosine	HMDB0000299	3.2	12.8	25.6	3.76994	48.8366	27.4077	17.7399	15.4771	15.5151	19.5478	117.811	381.536	107.061	138.593	120.915	121.212	152.717	0.365854	< LOD	< LOD	< LOD	1.44151	0.955914	1.0953	0.8185	0.947202	0.922247	0.834972	1.00107	0.974372	0.879883	0.835009	0.803907	1.05877	0.89539	1.0484	0.578076	3.62611	0.789189	0.668698	0.644361	1.27839	< LOD	0.943566	0.965156	0.837816	3.32194	14.5532
[truncated: 44 more columns]

## Sheet: DFI 1
		Calculated Concentration (µM)								ID#122639	ID#122640	ID#122641	ID#122642	ID#122643	ID#122644	ID#122645	ID#122646	ID#122647	ID#122648	ID#122649	ID#122650	ID#122651	ID#122652	ID#122653	ID#122654	ID#122655	ID#122656	ID#122657	ID#122658	ID#122659	ID#122660	ID#122661	ID#122662	ID#122663	ID#122664	ID#122665	ID#122666	ID#122668	ID#122669	ID#122670	ID#122671	ID#122672	ID#122673	ID#122674	ID#122675	ID#122676	ID#122677	ID#122678	ID#122679
Measure Name	HMBD ID	QC-1[1]	QC-2[1]	QC-3[1]	QC-2[1]-QC_2	QC-2[1]-QC_2	QC-2[1]-QC_2	QC-2[1]-QC_2	LOD	Exp_DBS_0_1_1	Exp_DBS_0_2_1	Exp_DBS_0_3_1	Exp_DBS_pool_1_1	Exp_5_A_1	Exp_2_F_1	Exp_9_F_1	Exp_11_F_1	Exp_8_A_1	Exp_2_A_1	Exp_11_A_1	Exp_9_A_1	Exp_3_F_1	Exp_4_F_1	Exp_5_F_1	Exp_DBS_pool_2_1	Exp_3_A_1	Exp_6_A_1	Exp_1_F_1	Exp_7_F_1	Exp_10_F_1	Exp_7_A_1	Exp_6_F_1	Exp_1_A_1	Exp_4_A_1	Exp_10_A_1	Exp_8_F_1	Exp_DBS_pool_3_1	Exp_Serum_pool_1_1	Exp_7_SF_1	Exp_10_SA_1	Exp_2_SF_1	Exp_10_SF_1	Exp_6_SF_1	Exp_1_SA_1	Exp_3_SF_1	Exp_3_SA_1	Exp_ 5_SA_1	Exp_11_SA_1	Exp_1_SF_1
C0	HMDB0000062	14.4096	15.1468	15.4123	13.9399	16.8544	17.083	14.0658	0.221574	< LOD	< LOD	0.234765	0.990164	5.43284	7.10401	6.9374	5.13813	5.12715	9.76008	5.99647	6.8633	6.92548	6.34962	4.75703	0.967	7.0858	6.1086	5.85946	9.74329	6.94815	7.3841	6.15278	6.77062	3.15794	7.93538	3.6391	1.03013	33.7339	43.9968	44.0537	33.9302	31.2543	45.5612	26.6342	44.255	39.516	17.2127	36.2519	24.2198
C10	HMDB0000651	7.62384	7.72676	8.01457	6.56214	8.28926	8.64267	5.86584	0.0584523	< LOD	< LOD	0.0622842	0.0856602	0.0943961	0.145985	0.165162	0.113346	0.105453	0.149779	0.108318	0.0629425	0.122666	0.199218	0.193236	< LOD	0.101723	0.160847	0.129501	0.189787	< LOD	0.167799	0.185762	0.198811	0.166084	0.187325	0.190173	0.173015	0.336638	0.241714	0.316324	0.322834	0.31661	0.20958	0.295271	0.39527	0.376064	0.338443	0.465864	0.477285
C10:1	HMDB0013205	0.315708	0.216695	0.185385	0.471548	0.819775	0.553201	0.629602	0.118456	< LOD	< LOD	< LOD	0.343289	0.36056	0.443766	0.555856	0.393656	0.419854	0.524191	0.569108	0.425497	0.475888	0.617704	0.637131	0.441872	0.594092	0.669487	0.471115	0.679422	0.404156	0.601346	0.750475	0.732134	0.706941	0.711527	0.616537	0.607511	0.672621	0.43621	0.591073	0.589849	0.509622	0.508949	0.59389	0.752789	0.863342	0.898498	0.784954	0.866996
C10:2	HMDB0241102	< LOD	< LOD	< LOD	< LOD	< LOD	< LOD	< LOD	0.0490262	< LOD	< LOD	< LOD	< LOD	< LOD	< LOD	< LOD	< LOD	< LOD	< LOD	< LOD	< LOD	< LOD	< LOD	< LOD	< LOD	< LOD	< LOD	< LOD	< LOD	0.301156	< LOD	< LOD	< LOD	< LOD	< LOD	< LOD	< LOD	< LOD	< LOD	< LOD	< LOD	< LOD	< LOD	< LOD	< LOD	< LOD	< LOD	< LOD	< LOD
C12	HMDB0002250	14.598	14.6673	14.8501	12.0902	13.6041	13.7911	6.11028	0.0442869	0.156052	0.319874	0.500429	1.38517	1.45029	1.53805	1.6993	1.55369	1.7662	2.23492	2.23304	1.91844	1.85625	2.135	2.35802	1.70781	2.57077	2.61437	1.89357	2.47928	0.821519	2.0313	2.47413	2.32177	2.61969	2.95599	2.06302	1.83238	1.76839	1.55094	1.69517	1.43401	1.57971	1.50608	1.60263	2.01681	2.38617	2.30261	2.19114	2.54648
C12:1	HMDB0013326	0.179715	0.203103	0.350586	0.262011	0.231464	0.235617	0.300757	0.0786161	< LOD	0.101194	0.188912	0.176081	0.222835	0.189415	0.125104	0.156315	0.23069	0.195736	0.300519	0.21687	0.245552	0.180601	0.223609	0.156413	0.18995	0.216451	0.16708	0.170464	0.380405	0.196723	0.180306	0.13227	0.223837	0.315733	0.190221	0.161605	0.228346	0.318427	0.394414	0.301552	0.326758	0.247773	0.34214	0.416713	0.289203	0.243142	0.32553	0.319607
C12DC	HMDB0013327	0.284419	0.223609	0.0709419	0.230622	0.310852	0.337008	0.61248	0.014805	< LOD	< LOD	< LOD	0.138692	< LOD	0.147159	0.0570343	0.11111	0.0347536	0.252295	0.257115	0.142062	< LOD	0.124215	0.0584656	0.154016	0.2819	0.113807	0.108612	0.072377	< LOD	0.142048	0.156192	0.0695526	0.21547	0.18624	0.146653	0.195562	0.0438201	< LOD	0.116669	0.0873059	0.0903764	< LOD	0.0308938	0.0772442	0.174028	< LOD	0.0496907	0.133463
C14	HMDB0005066	10.3763	10.5215	11.0932	8.86152	9.73894	10.6758	5.6752	0.0320477	0.100947	0.0942551	0.104654	0.203333	0.121561	0.13191	0.115047	0.113581	0.110447	0.148587	0.151325	0.145387	0.150959	0.135565	0.153311	0.145403	0.195329	0.15006	0.126447	0.100033	0.0893209	0.170427	0.201203	0.149226	0.0947477	0.300345	0.159219	0.167817	0.089484	0.118795	0.109428	0.0808873	0.146418	0.134642	0.0920822	0.237175	0.163192	0.19926	0.159456	0.221218
C14:1	HMDB0002014	< LOD	< LOD	< LOD	< LOD	0.108956	0.0737171	0.365378	0.0716192	< LOD	< LOD	< LOD	< LOD	< LOD	< LOD	< LOD	< LOD	< LOD	< LOD	< LOD	< LOD	0.075881	< LOD	< LOD	< LOD	< LOD	< LOD	< LOD	0.0907481	< LOD	< LOD	0.0862336	< LOD	< LOD	0.075719	< LOD	0.0796515	0.0917562	0.0829741	< LOD	0.144889	0.135717	< LOD	< LOD	0.121956	0.119288	0.138259	0.154566	0.163067
C14:1OH	HMDB0013330	0.142531	< LOD	< LOD	0.0803939	0.187081	0.157084	0.506639	0.0560108	< LOD	0.0627062	0.0899925	0.0873636	< LOD	< LOD	< LOD	0.058571	< LOD	< LOD	0.0976996	0.0585773	< LOD	< LOD	0.0903532	< LOD	0.0639842	0.0701766	0.110538	0.0841591	0.0865548	0.065428	0.0666543	< LOD	< LOD	< LOD	< LOD	0.0825627	0.0624269	< LOD	< LOD	< LOD	< LOD	0.0957431	0.116737	0.115602	0.11143	0.0907404	0.0916916	0.129739
C14:2	HMDB0013331	< LOD	< LOD	< LOD	< LOD	< LOD	< LOD	< LOD	0.0518871	< LOD	0.103751	< LOD	< LOD	< LOD	< LOD	< LOD	< LOD	< LOD	< LOD	< LOD	< LOD	< LOD	< LOD	< LOD	< LOD	< LOD	< LOD	< LOD	< LOD	< LOD	< LOD	< LOD	< LOD	< LOD	< LOD	< LOD	< LOD	< LOD	< LOD	< LOD	< LOD	< LOD	< LOD	< LOD	< LOD	< LOD	< LOD	< LOD	< LOD
C14:2OH	HMDB0013332	< LOD	< LOD	< LOD	0.0577581	0.107746	< LOD	0.365337	0.0542156	< LOD	< LOD	< LOD	0.0688566	< LOD	0.0938176	< LOD	< LOD	< LOD	0.0787766	0.0565385	< LOD	< LOD	< LOD	< LOD	< LOD	< LOD	< LOD	< LOD	< LOD	< LOD	< LOD	< LOD	< LOD	< LOD	0.0560019	< LOD	< LOD	< LOD	< LOD	< LOD	< LOD	< LOD	< LOD	< LOD	0.0869824	0.0767952	0.0806706	< LOD	0.0625448
C16	HMDB0000222	10.8054	10.7728	11.0777	9.13907	10.591	10.862	7.11032	0.0265047	0.129393	0.0465268	0.0591321	0.132622	0.336113	0.496834	0.417684	0.198689	0.297308	0.543062	0.339938	0.294634	0.196314	0.142298	0.299659	0.0901066	0.270468	0.492855	0.400123	0.457133	0.264116	0.29331	0.390957	0.357769	0.101485	0.324474	0.250201	0.115558	0.06046	0.176372	0.0575018	0.0646055	0.102669	0.135598	0.150552	0.100232	0.204714	0.122119	0.174524	0.193651
C16:1	HMDB0013207	0.152923	0.0964623	< LOD	0.0770081	0.311309	0.223725	1.25462	0.020051	0.102172	0.0806667	0.155534	0.151498	0.0664157	0.0796919	0.220107	0.0644906	0.0344028	0.188896	0.116709	< LOD	0.113539	0.13236	0.11001	0.170719	0.0918685	0.0775169	0.0544456	0.128216	< LOD	0.155872	0.104518	0.197582	0.135944	0.245605	0.10361	0.135722	< LOD	< LOD	0.0372962	< LOD	< LOD	< LOD	< LOD	0.0337372	0.184927	0.104986	0.0527682	0.140078
C16:1OH	HMDB0013333	0.0610455	< LOD	< LOD	< LOD	0.259734	0.131199	1.09185	0.0490597	< LOD	< LOD	0.126808	0.0809288	0.0691279	0.0890832	< LOD	< LOD	< LOD	< LOD	0.0712469	< LOD	< LOD	0.108274	0.120481	0.059305	< LOD	< LOD	0.0540757	< LOD	< LOD	0.105613	< LOD	0.0989886	< LOD	0.113488	< LOD	0.0620734	< LOD	< LOD	< LOD	< LOD	< LOD	< LOD	0.11074	< LOD	0.131614	0.0853937	0.0976545	< LOD
C16:2	HMDB0013334	0.198216	0.11167	0.12244	0.174084	0.328731	0.411382	1.01672	0.0462689	0.128346	0.109423	0.203925	0.241977	0.115242	0.154313	0.333974	0.187988	0.227033	0.35373	0.209135	0.135529	0.249116	0.14982	0.181035	0.103763	0.222512	0.321154	0.139872	0.164574	< LOD	0.133742	< LOD	0.262871	0.331885	0.219815	0.0904027	0.17418	< LOD	0.122508	0.0507757	< LOD	< LOD	0.0495238	0.147934	0.207877	0.243442	0.29261	0.208771	0.258897
C16:2OH	HMDB0013335	0.113438	< LOD	< LOD	< LOD	0.246551	0.0638401	0.893696	0.0368126	< LOD	< LOD	< LOD	0.0682763	< LOD	0.0390599	0.210737	< LOD	< LOD	0.0449643	< LOD	< LOD	0.0524697	0.043298	0.105103	< LOD	< LOD	0.0800036	0.0652611	< LOD	< LOD	< LOD	0.0582976	< LOD	< LOD	< LOD	< LOD	0.0825568	0.0435626	< LOD	< LOD	< LOD	< LOD	< LOD	< LOD	< LOD	0.0701438	< LOD	0.043564	< LOD
C16OH	HMDB0013336	< LOD	< LOD	< LOD	< LOD	< LOD	< LOD	0.730141	0.0426173	< LOD	< LOD	< LOD	< LOD	< LOD	< LOD	< LOD	< LOD	< LOD	< LOD	< LOD	< LOD	< LOD	< LOD	< LOD	< LOD	< LOD	< LOD	< LOD	< LOD	< LOD	< LOD	< LOD	< LOD	< LOD	< LOD	< LOD	< LOD	< LOD	< LOD	< LOD	< LOD	< LOD	< LOD	< LOD	< LOD	< LOD	< LOD	< LOD	< LOD
C18	HMDB0000848	10.6806	11.0167	11.4473	9.34282	11.3871	11.8135	8.24775	0.023651	< LOD	< LOD	0.0483871	0.110563	0.145284	0.193069	0.202232	0.153439	0.163434	0.283549	0.185145	0.112963	0.206986	0.249815	0.21778	0.0274865	0.199969	0.225352	0.250341	0.285795	0.123173	0.220014	0.161194	0.224498	0.0654883	0.159829	0.08755	< LOD	< LOD	0.0278696	< LOD	0.0295667	< LOD	0.0279508	0.0686006	0.0793444	0.0385661	0.0575306	0.0754698	< LOD
C18:1	HMDB0006464	0.048247	0.0935122	< LOD	0.0690974	0.279657	0.0724503	0.901357	0.0410815	< LOD	< LOD	0.0756008	0.0812197	0.63878	0.504033	0.518313	0.331829	0.546014	0.569917	0.388564	0.369846	0.368881	0.516046	0.517449	< LOD	0.405753	0.600205	0.469782	0.672877	0.362323	0.46205	0.45623	0.604738	0.191888	0.336985	0.358684	0.109002	0.159267	0.0880506	0.126744	0.122493	0.132873	0.0607319	0.191309	0.211336	0.196483	0.198457	0.194498	0.163296
C18:1OH	HMDB0013340	< LOD	< LOD	< LOD	< LOD	0.0753357	< LOD	0.369294	0.0567844	< LOD	< LOD	< LOD	< LOD	< LOD	< LOD	0.0669084	< LOD	< LOD	< LOD	< LOD	< LOD	< LOD	< LOD	< LOD	< LOD	< LOD	< LOD	< LOD	< LOD	< LOD	< LOD	0.0599775	< LOD	< LOD	0.0738037	< LOD	< LOD	< LOD	< LOD	< LOD	< LOD	< LOD	< LOD	< LOD	< LOD	< LOD	< LOD	< LOD	< LOD
C18:2	HMDB0006469	0.0962481	< LOD	0.117577	0.129613	0.233793	0.130879	0.916611	0.0580895	0.111829	0.0793015	0.105499	0.0957537	0.189266	0.259364	0.45359	0.0910831	0.190515	0.29957	0.14303	0.161771	0.196683	0.285504	0.253925	< LOD	0.178994	0.241496	0.216418	0.181288	0.0899904	0.148467	0.163649	0.334228	0.176245	0.273255	0.132625	0.13486	< LOD	< LOD	< LOD	0.0650405	0.0615554	0.0681992	0.112742	0.117472	0.197545	0.178069	0.193998	0.097757
C2	HMDB0000201	11.9813	12.078	12.6673	10.3004	13.3043	13.2905	13.0138	0.134738	< LOD	< LOD	< LOD	0.309706	2.99509	3.17101	4.95045	2.85064	3.53021	4.92251	3.07683	3.50756	2.71865	2.96486	2.84465	0.318519	2.98956	3.98814	2.83638	4.96394	2.63343	3.34251	3.12564	3.4979	1.077	1.93642	1.75452	0.404547	5.39609	6.41982	5.29595	5.94518	4.16003	5.66444	4.05178	4.14939	3.78674	3.82608	7.09131	4.08614
C3	HMDB0000824	10.1703	10.1614	10.3519	8.37964	10.7133	10.7373	8.21629	0.0823822	< LOD	< LOD	< LOD	0.0985239	0.523021	0.441843	0.585223	0.504062	0.758278	0.667282	0.872832	0.452383	0.554159	0.503608	0.67064	0.0950595	0.692998	0.490319	0.380985	0.945714	0.200678	0.544334	0.522898	0.503431	0.225692	0.386532	0.367002	0.110067	0.623161	0.878301	0.622839	0.445348	0.417858	1.44622	0.419265	0.936979	0.706652	0.340071	0.689798	0.38751
C3:1	HMDB0013124	< LOD	< LOD	0.0291898	< LOD	0.0751024	0.0471554	0.275631	0.0256276	< LOD	< LOD	< LOD	< LOD	< LOD	< LOD	0.0341337	< LOD	< LOD	0.0412345	< LOD	< LOD	< LOD	0.0326229	< LOD	< LOD	< LOD	< LOD	< LOD	< LOD	< LOD	< LOD	0.0295424	< LOD	0.026692	< LOD	< LOD	< LOD	< LOD	0.030333	< LOD	< LOD	< LOD	0.0630542	< LOD	0.0518224	< LOD	0.0373144	0.0373028	0.0274576
C3OH	HMDB0013125	0.0876324	0.0978608	0.0843153	0.070294	0.170857	0.181698	0.971732	0.0337271	< LOD	< LOD	< LOD	< LOD	< LOD	0.0371004	0.0367421	< LOD	< LOD	< LOD	< LOD	< LOD	< LOD	< LOD	0.0384377	< LOD	0.0386059	0.0429496	< LOD	< LOD	< LOD	0.0364516	< LOD	< LOD	< LOD	0.0371764	< LOD	< LOD	< LOD	0.0367477	< LOD	< LOD	< LOD	0.06485	< LOD	0.0440944	0.0437254	0.0703677	0.0371576	0.0388587
C4	HMDB0002013	10.4788	10.6108	10.6407	8.27993	10.1429	10.7695	7.98828	0.0486018	< LOD	< LOD	< LOD	< LOD	< LOD	0.109495	0.076357	0.071689	0.0603458	0.121923	0.0697642	0.0811337	0.0712744	0.0727839	0.0829867	< LOD	0.061434	0.0942488	0.0527812	0.0873497	< LOD	0.0793535	0.0827432	0.0555433	0.0560408	0.0971983	0.0516147	< LOD	0.19258	0.369938	0.241546	0.265746	0.178553	0.287882	0.186305	0.347725	0.242551	0.131219	0.310715	0.161149
C4:1	HMDB0013126	< LOD	< LOD	< LOD	0.0553583	0.10285	0.0606232	0.552385	0.0240247	< LOD	< LOD	< LOD	< LOD	< LOD	0.0271848	< LOD	0.0347999	< LOD	< LOD	0.0308757	< LOD	0.0470187	0.0488509	0.0298199	< LOD	< LOD	< LOD	0.0781583	0.0468842	< LOD	0.0297356	0.0602535	0.0465821	0.0460063	0.0335926	< LOD	0.0447138	0.0323876	< LOD	< LOD	0.0300565	0.0241889	0.0620517	0.0418307	0.0286803	0.0736628	0.0524	0.0565476	0.0277111
C4OH	HMDB0013127	0.0475559	< LOD	< LOD	0.0583778	0.178324	0.111773	0.913473	0.0236706	0.0420776	0.0274075	0.0705581	0.0417535	0.0466149	0.0736599	0.0977294	0.0425666	0.0700831	0.104475	0.0620629	0.055947	0.0825823	0.0771372	0.0937522	0.0441344	0.0478927	0.0729566	0.0440053	0.0620096	< LOD	0.0594872	0.0828533	0.0596504	0.0985754	0.0757759	0.0238977	0.0672378	0.0548351	0.0554038	0.0491253	0.162109	0.0396354	0.0396236	0.0990002	0.120038	0.13895	0.0482476	0.0796682	0.0996234
C5	HMDB0013128	0.0378997	< LOD	< LOD	0.0304362	0.126885	0.102123	0.573789	0.0255714	< LOD	< LOD	0.0370089	0.0366285	0.0434179	0.0885893	0.0894327	0.0509658	0.0734303	0.0966924	0.105349	0.0719719	0.107699	0.0929763	0.0383153	< LOD	0.0461927	0.0770796	0.0580914	0.137756	< LOD	0.0858669	0.0849256	0.0748975	0.0940905	0.0869373	0.0531535	0.0382738	0.130827	0.241411	0.141977	0.130561	0.0790888	0.221193	0.134002	0.234691	0.154217	0.0862531	0.218172	0.137234
C5:1	HMDB0002366	< LOD	< LOD	< LOD	< LOD	0.0708314	0.0366531	0.272593	0.0304724	< LOD	< LOD	< LOD	< LOD	0.0380941	< LOD	0.0401496	< LOD	0.0306287	0.0383314	0.048568	< LOD	< LOD	0.0370003	0.049848	< LOD	0.0317352	0.0464929	< LOD	0.0587621	< LOD	0.0488824	0.0407669	0.0344883	0.0387578	0.0590299	0.0405191	0.0484017	< LOD	0.0394988	0.0369071	< LOD	0.0421743	0.0326593	0.0547139	0.0616316	0.0673774	0.0455082	0.065129	0.0628812
C5:1DC	HMDB0013129	0.0453096	0.0277208	0.0503679	0.0776561	0.189043	0.141519	0.67074	0.0250182	< LOD	< LOD	0.0442137	0.0418896	0.0334224	0.039619	0.0726651	0.0256253	0.0339107	0.0470958	0.066196	0.03742	0.0265754	0.0713828	0.0674528	0.0323644	0.0537978	0.0507446	0.0422561	0.0865122	< LOD	0.0680566	0.0633302	< LOD	0.0765326	0.0675956	0.0394445	0.0459754	0.0644952	0.0615448	0.0443649	0.0489239	0.0298314	0.0753984	0.081447	0.129995	0.114567	0.0888023	0.0862831	0.0863219
C5DC	HMDB0013130	0.0333377	0.02383	< LOD	0.0832495	0.200091	0.14089	0.858168	0.0190654	0.0390286	0.0212205	0.0609022	0.0497315	0.0480633	0.0644891	0.101971	0.0507527	0.047487	0.0490712	0.0547916	< LOD	0.0588638	0.0702161	0.0962897	0.0411702	0.0305052	0.055335	0.0511625	0.0510476	< LOD	0.0835113	0.131427	0.0939435	0.0355664	0.110988	0.0846309	0.065619	0.0629303	0.0248851	0.0716624	0.0969441	0.0540169	0.0621385	0.0802863	0.120666	0.126644	0.118055	0.119331	0.158251
C5MDC	HMDB0000552	0.112015	0.100636	0.0975057	0.174018	0.226534	0.212841	0.947804	0.0217724	< LOD	0.0359092	0.0704613	0.0271089	0.0428567	0.0719807	0.122233	0.0254131	0.0344067	0.0531424	0.0889886	< LOD	0.0648167	0.0754757	0.0538791	0.0381673	0.0666656	0.0585958	0.0665401	0.107958	< LOD	0.0632861	0.101187	0.0683695	0.0569736	0.0556647	0.0569305	0.0822978	0.0918981	0.031372	0.0824799	< LOD	0.0385782	0.0764417	0.101306	0.11946	0.121444	0.0905614	0.145061	0.123275
C5OH	HMDB0013132	0.0968317	0.092068	0.061754	0.115299	0.16897	0.160547	0.660993	0.0341184	0.0409619	< LOD	0.0468488	0.0533533	0.0956576	0.104351	0.100159	0.0699464	0.0916019	0.0915377	0.110763	0.0793422	0.126175	0.101855	0.0878423	0.0366232	0.0911142	0.124872	0.101619	0.102425	< LOD	0.123713	0.0684346	0.133219	0.0881272	0.0648653	0.0957223	0.0633081	0.0781144	< LOD	0.053896	0.0545642	< LOD	0.0938686	0.0647123	0.0883779	0.117953	0.0632206	0.0717807	0.0676504
C6	HMDB0000756	9.91002	10.1794	10.5772	8.37806	10.0803	9.45092	5.4114	0.0929131	< LOD	< LOD	< LOD	0.101937	0.144416	0.252681	0.470426	0.190124	0.141657	0.23022	0.132503	< LOD	0.201485	0.400653	0.419424	0.102358	< LOD	0.272677	0.199136	0.320598	< LOD	0.535797	0.529525	0.40915	0.334446	0.348156	0.301387	0.409129	0.40335	0.356756	0.401575	0.400914	0.472395	0.453395	0.51318	0.69198	0.69227	0.569983	0.726984	0.783606
C6:1	HMDB0013161	0.0543887	0.0316954	0.0480283	0.114074	0.216131	0.106971	0.277697	0.0246837	< LOD	< LOD	0.0247291	0.0402038	0.0547591	0.0726843	0.147286	0.0450453	0.0657699	0.0658785	0.029441	< LOD	0.0586236	0.123907	0.105763	0.0475523	0.0567513	0.0832214	0.0823175	0.106699	0.0442264	0.152091	0.159322	0.0863071	0.118492	0.108434	0.090634	0.114497	0.127651	0.0825066	0.114657	0.133748	0.113996	0.141396	0.12425	0.165559	0.191945	0.16169	0.198141	0.185974
C7DC	HMDB0013328	0.0336752	< LOD	0.0233683	0.0290964	0.181281	0.138366	1.11638	0.019987	< LOD	< LOD	0.100795	0.0516387	0.565075	0.029428	0.0796016	< LOD	0.134945	0.0715913	0.0795652	< LOD	0.0795764	0.128635	0.0497871	0.0275792	0.0692574	0.0757178	0.270656	0.0459403	< LOD	0.0710777	0.0594217	0.0471723	0.0471137	0.0335468	0.0237858	0.0597472	0.101837	< LOD	0.0377851	0.071812	< LOD	0.0706228	0.0826876	0.109457	0.0941782	0.0972309	0.0614529	0.0863808
C8	HMDB0000791	9.99844	10.0477	10.3893	8.18462	10.116	10.4762	6.53244	0.0316457	< LOD	0.0480285	0.0389908	0.0390035	0.0759385	0.133588	0.121511	0.0599125	0.068998	0.088244	0.0525905	0.0368247	0.0688912	0.148257	0.113974	0.0630675	0.0384975	0.131337	0.0641859	0.104136	< LOD	0.116488	0.127754	0.107471	0.0743482	0.0959292	0.075217	0.128459	0.156906	0.123778	0.189346	0.190483	0.151726	0.104481	0.212948	0.296405	0.196699	0.236584	0.247187	0.229501
C9	HMDB0006320	0.0358211	0.038695	0.0282168	0.0676464	0.146163	0.10718	0.609563	0.0110069	0.0168103	0.0256838	0.0323076	0.0423661	0.0454519	0.0442352	0.0484405	0.0324001	0.036784	0.052301	0.0459531	0.0269779	0.040827	0.0612665	0.057707	0.0130692	0.0367717	0.0214664	0.0314728	0.0572631	< LOD	0.0442828	0.0975205	0.0453081	0.0354659	0.0562129	0.026087	0.0526497	0.0906684	0.0357683	0.0698131	0.0599592	0.064195	0.0684901	0.0495062	0.109459	0.112202	0.0742073	0.0867833	0.113124
Hexose	HMDB0000143	4942.87	4975.68	5217.36	4503.02	5550.53	5579.54	5901.42	22.5	< LOD	< LOD	< LOD	111.01	768.089	989.023	1402.93	1092.06	1063.94	1034.67	1359.6	1092.77	1120.01	798.833	828.685	138.986	812.321	1013.11	830.445	1018.15	1192.93	1103.24	733.389	952.377	412.78	1104.53	1389.69	126.534	5277.95	5223.61	4921.13	4459.77	5221.74	4705.48	4643.07	5160.21	4420.99	2865.1	7418.54	4590.71
LysoPC a C14:0	HMDB0010379	< LOD	< LOD	< LOD	0.255045	0.225753	0.276746	1.16588	0.129569	< LOD	< LOD	0.157358	0.144701	0.427792	0.689793	0.497513	0.590823	0.437127	0.643755	0.652725	0.633934	0.514842	0.407299	0.512621	0.162682	0.754587	0.666536	0.680851	0.835927	0.580034	0.860346	0.916351	0.672476	0.367476	0.54225	0.59163	0.175154	4.96535	10.4567	3.87571	4.60406	3.51298	7.74287	4.11873	3.32037	6.62548	1.74833	5.53879	3.68832
LysoPC a C16:0	HMDB0010382	< LOD	< LOD	< LOD	1.74756	< LOD	0.13453	0.308645	0.108457	< LOD	< LOD	< LOD	1.11467	9.84562	13.0311	11.208	9.70953	7.20326	12.0678	8.00185	8.24852	9.78383	6.32919	8.32967	1.04191	12.7288	10.0951	12.1387	13.3682	15.3175	13.1173	8.40807	13.6268	1.99233	8.62082	8.7848	1.20219	87.5645	170.534	65.8397	114.333	101.192	97.1927	96.5906	85.3197	125.82	41.6537	79.5047	102.109
LysoPC a C16:1	HMDB0010383	< LOD	< LOD	< LOD	0.109945	0.105362	< LOD	0.301762	0.0747157	< LOD	< LOD	< LOD	< LOD	0.372965	0.392085	0.319568	0.441922	0.148969	0.589926	0.320741	0.334619	0.273748	0.221373	0.307084	< LOD	0.333168	0.344342	0.494606	0.620662	0.494417	0.530534	0.483136	0.434661	0.0771121	0.274292	0.466201	0.07796	3.33545	9.81606	1.83337	3.65624	3.19524	4.36722	3.07965	2.17288	3.79056	1.83126	3.47153	3.7202
LysoPC a C17:0	HMDB0012108	0.0283568	0.0165805	< LOD	0.0857556	0.0850247	0.0965453	0.412544	0.0164486	< LOD	< LOD	< LOD	0.0472251	0.264817	0.437535	0.298391	0.337932	0.208984	0.249704	0.240148	0.203095	0.297496	0.224449	0.234263	0.0575031	0.337905	0.381237	0.390285	0.328802	0.443349	0.346811	0.300055	0.392135	0.0675281	0.265364	0.304834	0.0729139	1.94364	2.08327	1.44267	2.28984	2.20334	2.68836	2.23296	1.70238	2.85413	1.06614	1.86199	2.69204
LysoPC a C18:0	HMDB0010384	10.1634	10.4758	11.2879	10.3245	12.467	13.1941	20.8953	0.0532478	< LOD	< LOD	< LOD	0.428446	2.88839	4.43793	4.66231	3.22032	2.32869	4.13002	2.40545	3.24322	3.92487	2.67111	2.07892	0.410396	4.61602	3.56927	3.94447	3.78765	6.25418	4.63934	2.30951	4.36659	0.78031	2.55013	3.1394	0.458358	23.811	35.9039	16.889	32.471	31.4739	22.3028	24.7036	26.3873	38.1724	9.1884	18.9268	26.7338
LysoPC a C18:1	HMDB0002815	14.4834	14.6276	15.472	13.6993	16.6011	17.6484	25.0644	0.0518359	< LOD	< LOD	< LOD	0.418024	2.94903	3.58339	3.39078	3.16988	2.02644	4.26188	2.04226	2.60807	3.40835	1.90665	2.50901	0.352602	3.66018	3.25222	4.91256	5.34806	4.72074	3.93023	2.87047	5.0197	0.613583	1.97307	3.02017	0.36977	26.6748	51.7748	14.5008	29.6779	30.9361	27.7731	38.0117	28.2008	32.8583	13.3079	18.0383	41.61
LysoPC a C18:2	HMDB0010386	< LOD	0.0414488	< LOD	1.24102	0.0626566	< LOD	0.363205	0.0399385	< LOD	< LOD	< LOD	0.431	2.84741	5.59059	5.66912	2.56474	1.97174	4.23237	1.6006	3.56561	6.96739	2.8476	3.11625	0.364247	5.87801	3.07006	5.9755	6.32296	3.57999	3.54866	4.03617	6.2207	0.980596	1.89914	3.56858	0.450798	34.6088	48.5155	13.7757	47.4472	25.1703	40.3921	52.5687	67.9682	53.8082	13.968	16.1616	57.0704
LysoPC a C20:3	HMDB0010393	1.21914	0.974659	1.43155	2.02271	5.24117	1.24048	6.932	0.0894585	< LOD	< LOD	0.272401	< LOD	0.929902	2.2545	3.9081	1.45384	< LOD	2.34052	< LOD	< LOD	0.348269	3.88367	3.57716	< LOD	1.15787	0.16181	1.73845	2.15966	5.88322	3.19386	3.89991	3.7347	1.18846	2.32393	2.43705	2.16537	6.39011	9.14639	4.69218	7.66878	5.53265	6.8282	8.24487	9.40217	11.3375	6.52377	8.55446	10.6679
LysoPC a C20:4	HMDB0010395	< LOD	< LOD	< LOD	0.344549	0.0687592	0.0643807	0.421255	0.0282163	< LOD	< LOD	< LOD	0.171109	1.14979	1.91503	1.07347	1.15385	0.736965	1.5894	0.754201	0.882148	1.50722	1.00548	1.0349	0.191154	1.39733	1.26785	2.95372	1.45884	1.83467	1.27196	0.987043	2.818	0.306918	0.802875	1.22414	0.206211	11.6709	11.0602	6.26987	16.903	12.4496	10.4196	22.5751	13.7485	12.0845	5.71002	7.57915	29.1504
LysoPC a C24:0	HMDB0010405	< LOD	< LOD	< LOD	< LOD	0.061587	0.0595426	0.252578	0.0374085	< LOD	< LOD	< LOD	0.116419	0.23071	0.639123	0.428024	0.461821	0.534628	0.553518	0.488357	0.598631	0.611627	0.716169	0.475721	0.117035	0.715906	0.352935	0.633996	0.639953	0.636983	0.536821	0.498739	0.530801	0.184481	0.496909	0.645176	0.0849101	0.176257	0.210359	0.135045	0.168364	0.219353	0.173999	0.160945	0.101854	0.258573	0.10709	0.196333	0.17628
LysoPC a C26:0	HMDB0029205	< LOD	< LOD	< LOD	< LOD	< LOD	< LOD	0.411023	0.129242	< LOD	< LOD	< LOD	0.266841	0.397882	1.32017	0.789023	1.12549	1.06176	0.883099	0.769907	1.84087	0.858091	1.00949	0.645359	0.246701	1.5578	0.606292	1.2898	1.67845	1.08367	0.90369	0.852946	0.892789	0.240869	0.88369	1.25046	0.305196	0.211035	0.326845	0.276906	0.247615	0.260844	0.348903	0.184045	< LOD	0.239837	0.195521	0.310032	0.2374
LysoPC a C26:1	HMDB0029220	< LOD	< LOD	< LOD	< LOD	0.0453672	0.0578873	0.194955	0.0327048	< LOD	< LOD	< LOD	0.0469101	0.101072	0.176993	0.186006	0.160381	0.179227	0.204176	0.190967	0.194855	0.175149	0.134679	0.154396	0.0725553	0.216653	0.130001	0.173039	0.23252	0.262838	0.098883	0.200536	0.205415	0.0417386	0.179335	0.186873	0.0682334	0.113779	0.203505	0.131895	0.127864	0.176275	0.209473	0.169576	0.153381	0.171395	0.0986248	0.16996	0.141399
LysoPC a C28:0	HMDB0029206	< LOD	< LOD	< LOD	< LOD	0.0947239	< LOD	0.229143	0.0714712	< LOD	< LOD	< LOD	0.189442	0.289711	0.738645	0.504939	0.629614	0.664178	0.566063	0.538879	1.11778	0.532949	0.735544	0.400751	0.152836	0.919077	0.408947	0.673199	0.874706	0.706208	0.532381	0.508795	0.565515	0.17731	0.520967	0.75018	0.163624	0.162104	0.254985	0.101737	0.21331	0.289064	0.289377	0.189222	0.160882	0.21977	0.15358	0.289179	0.171871
LysoPC a C28:1	HMDB0029221	< LOD	< LOD	< LOD	< LOD	0.0774698	< LOD	0.287805	0.0519119	< LOD	< LOD	< LOD	< LOD	0.088047	0.196534	0.0848071	0.175332	0.103857	0.181272	0.146668	0.156584	0.167787	0.168382	0.112632	0.067622	0.129734	0.142392	0.125789	0.232355	0.0850613	< LOD	0.161718	0.116879	< LOD	0.197498	0.200289	< LOD	0.0929538	0.0714608	0.0959879	0.135065	0.064347	0.164902	0.0942517	0.118063	0.132243	0.101645	0.0593188	0.110091
PC aa C24:0	N/A	< LOD	< LOD	0.153509	< LOD	0.126673	< LOD	0.366699	0.076747	< LOD	< LOD	< LOD	0.430711	0.87164	2.5316	1.59487	2.09056	1.6909	2.21845	1.71114	1.83072	2.45803	2.3941	1.41966	0.383912	2.2713	1.55813	2.81631	2.50537	1.73672	1.7069	1.66674	2.40062	0.501282	1.6703	2.0545	0.48475	0.506107	0.524302	0.364134	0.33299	0.475114	0.53493	0.384949	0.381455	0.263389	0.374793	0.280144	0.548263
PC aa C26:0	N/A	< LOD	< LOD	< LOD	< LOD	< LOD	< LOD	< LOD	0.640483	< LOD	< LOD	< LOD	1.28045	0.789468	4.26812	2.56874	4.3979	3.85165	2.42504	2.30241	8.96148	2.41154	3.82326	1.44065	1.30946	6.5235	1.52797	4.50855	5.65588	2.48382	2.58253	2.56717	2.18962	0.798609	2.21686	3.67302	1.50753	0.993382	1.99503	0.818906	1.13438	0.8324	1.52144	0.764595	0.736032	1.00228	< LOD	1.06319	1.06985
PC aa C28:1	HMDB0007867	< LOD	< LOD	< LOD	0.171957	< LOD	0.0743322	0.222544	0.0277614	< LOD	< LOD	< LOD	0.706241	2.87742	3.76121	3.10448	3.66384	4.21235	2.65713	3.46662	3.47468	3.97512	2.45235	2.58832	0.689907	3.75328	3.05088	3.09007	3.63974	3.82663	3.2562	2.33321	3.04287	0.73375	3.70625	4.05536	0.697286	6.0456	10.8313	7.19647	7.87035	5.8186	6.54649	5.02798	7.6859	7.86514	2.3058	7.46781	4.66046
PC aa C30:0	HMDB0007869	< LOD	< LOD	< LOD	0.146561	< LOD	< LOD	0.257675	0.107922	< LOD	< LOD	< LOD	0.452707	3.56912	5.35466	3.78723	4.4635	4.39916	4.63206	4.25486	4.03002	4.25147	3.47016	3.67018	0.469467	4.72422	4.59624	3.80348	4.78614	4.33681	3.81862	4.80414	4.3012	0.940492	5.26499	4.1053	0.623003	8.9616	23.224	8.70903	10.7598	6.38317	18.4945	7.7108	7.31225	11.3301	2.267	11.8484	7.94197
PC aa C32:0	HMDB0000564	0.199699	0.211356	0.291515	0.467749	0.230796	0.178004	0.462214	0.0673798	< LOD	< LOD	< LOD	1.63941	16.4291	20.7982	19.8832	12.8244	19.7851	19.8559	15.4376	15.8665	17.0436	12.2576	14.6125	1.65624	14.7782	17.4303	14.5241	16.4263	19.5085	14.523	14.4795	17.6333	3.82905	17.2446	17.4626	1.56136	22.3898	52.3657	24.4861	29.7355	18.1663	35.4985	20.2359	17.9653	24.5356	6.55617	29.2353	20.9327
PC aa C32:1	HMDB0007872	6.79794	6.57606	7.46863	6.95307	8.17575	8.23092	9.97672	0.058633	< LOD	0.064941	0.0754007	1.10912	7.94188	10.8624	9.61022	10.6276	10.348	14.1435	11.4238	8.95371	8.08574	8.03775	7.57012	1.13203	8.22626	10.7338	7.44851	14.8845	10.0093	9.80153	10.545	7.95914	2.50112	10.5541	9.59623	1.18806	37.1689	165.641	29.3074	36.3723	23.1296	58.5182	26.6165	22.4135	34.864	12.3736	49.1028	29.1535
PC aa C32:2	HMDB0007874	0.602197	0.440217	0.362489	0.7838	1.34213	0.965329	0.576007	0.074223	0.238551	0.260259	0.153371	0.717444	1.93262	2.37498	2.86771	1.97893	2.3094	2.49312	2.57437	2.16757	1.97107	2.61787	2.25102	0.929205	2.35953	2.68829	1.98786	3.04172	4.22294	2.80695	2.15366	2.73411	1.95809	2.76221	2.1875	1.0185	6.25049	12.7956	5.92948	6.95553	5.14805	6.13053	6.23579	5.78853	7.2867	2.73903	8.0969	5.94887
PC aa C32:3	HMDB0007875	0.0614059	0.0352917	0.0361426	0.0554153	0.042709	0.0391337	0.119538	0.0202841	< LOD	< LOD	< LOD	< LOD	0.30546	0.377036	0.400931	0.298272	0.205639	0.318552	0.261446	0.250647	0.38489	0.40009	0.292206	< LOD	0.313965	0.363631	0.339419	0.373747	0.439207	0.32622	0.143806	0.403868	0.0284293	0.366443	0.332666	0.105123	0.817944	1.64285	0.72917	0.881519	0.599462	1.09186	0.795643	0.769678	0.916431	0.456915	0.833822	0.878056
PC aa C34:1	HMDB0007879	< LOD	< LOD	< LOD	5.37768	< LOD	< LOD	< LOD	0.436932	< LOD	< LOD	< LOD	8.84951	93.2873	102.119	99.5675	84.2763	101.64	116.622	104.429	91.4566	83.9517	73.4581	79.3717	8.99569	86.965	94.5146	81.0303	142.07	117.167	102.012	82.2442	100.625	18.0605	110.412	84.9048	9.3414	379.273	1166.08	325.942	379.175	316.428	484.867	327.505	286.073	405.855	151.19	430.014	368.966
PC aa C34:2	HMDB0007880	< LOD	< LOD	< LOD	11.3771	< LOD	< LOD	< LOD	0.289445	< LOD	< LOD	< LOD	8.90292	84.2748	123.101	120.732	61.0416	106.901	90.3508	95.3758	109.237	105.894	97.8302	80.0915	8.69739	116.585	85.4388	78.7837	123.775	86.1195	89.6224	75.5751	97.4644	28.0137	110.881	79.3862	8.80559	538.668	1106.34	484.097	697.446	374.5	611.506	511.456	655.211	792.326	187.03	557.921	524.146
PC aa C34:3	HMDB0007881	< LOD	< LOD	< LOD	0.325288	< LOD	< LOD	0.173263	0.0537259	< LOD	< LOD	< LOD	0.326529	2.53796	4.13058	2.94668	2.68194	3.21636	4.09967	3.13158	3.34362	2.64183	2.76328	2.16115	0.288563	3.80195	2.89456	2.47755	4.70297	2.75167	2.9638	2.93334	3.08884	0.604842	3.3957	2.72889	0.275923	18.8718	58.179	14.2577	24.1115	10.9943	23.7092	16.9099	15.1718	25.8221	7.15812	19.5362	16.5292
PC aa C34:4	HMDB0007883	0.0477921	< LOD	< LOD	0.0716066	< LOD	0.0546777	0.169221	0.0420391	< LOD	< LOD	< LOD	< LOD	0.389241	0.600619	0.349899	0.579257	0.450277	0.469304	0.597412	0.465637	0.514412	0.439301	0.293802	0.0937325	0.515699	0.471168	0.537289	0.623335	0.526144	0.524102	0.4517	0.62125	0.0887136	0.560297	0.583049	0.0794888	3.03263	7.0585	2.30677	3.21347	1.97593	3.90607	4.09443	2.46385	3.88763	1.01761	3.50167	3.51067
PC aa C36:0	HMDB0007886	10.343	10.5826	11.5777	10.2135	12.0828	12.6978	16.2524	0.158569	< LOD	< LOD	< LOD	0.623727	3.12131	6.3365	7.31475	3.47748	6.38834	5.22472	5.15758	6.96291	7.12169	6.99718	4.11281	0.570512	7.28239	4.25645	4.56203	6.41841	4.51706	4.9224	4.29526	5.90883	1.90406	5.18179	4.62476	0.604354	7.79147	17.8466	6.80101	8.0123	7.47422	10.2991	5.65244	8.54975	9.95702	2.22097	7.52936	5.99717
PC aa C36:1	HMDB0007887	< LOD	< LOD	< LOD	1.5988	< LOD	< LOD	0.134812	0.122792	< LOD	< LOD	< LOD	2.26457	18.443	25.4634	29.9143	18.4199	23.8969	28.8851	21.6596	26.3159	26.5286	26.4938	17.65	2.19249	24.6554	23.6953	18.049	28.5624	28.5112	23.265	17.7266	22.5193	7.24662	24.559	21.989	2.39383	79.0177	195.849	61.1129	78.6778	73.6143	92.4709	62.3806	78.3978	97.887	22.7342	73.0026	63.0651
PC aa C36:2	HMDB0000593	< LOD	< LOD	< LOD	5.76948	< LOD	< LOD	< LOD	0.120642	< LOD	< LOD	< LOD	4.15832	36.82	51.3015	59.6543	31.0334	49.2908	49.1235	40.8936	54.8575	52.7384	49.7769	34.31	4.03114	54.1282	45.3234	35.892	57.6471	51.4657	44.5178	32.1125	45.1952	13.9448	50.4883	41.9392	3.82445	271.866	528.234	227.534	323.341	236.358	278.554	245.623	331.69	410.864	93.2638	257.943	240.339
PC aa C36:3	HMDB0007921	< LOD	< LOD	< LOD	3.52216	< LOD	< LOD	< LOD	0.128284	< LOD	< LOD	< LOD	2.5391	30.1894	37.207	32.3096	25.5184	28.7132	34.783	31.1117	26.5067	26.6707	22.7846	25.0845	2.43765	30.6681	28.0389	24.1513	39.199	33.8555	27.8162	20.7898	31.8466	5.55409	33.9447	22.5062	2.28092	195.433	448.759	187.776	241.616	175.332	191.189	197.505	189.324	245.604	88.8605	232.095	190.429
PC aa C36:4	HMDB0007889	< LOD	< LOD	< LOD	5.40589	< LOD	< LOD	< LOD	0.146385	< LOD	< LOD	< LOD	3.02174	38.38	54.5183	31.9091	39.2249	28.7909	48.09	38.3637	22.6734	33.9426	32.3298	36.518	3.00356	36.4239	37.7457	49.4234	51.4844	50.476	37.7588	32.2749	53.3188	8.21325	44.853	32.9361	2.98586	304.579	489.036	260.418	426.935	298.273	338.012	407.974	292.624	347.161	129.107	324.051	478.017
PC aa C36:5	HMDB0007890	< LOD	< LOD	< LOD	0.690092	< LOD	< LOD	0.221311	0.0600371	< LOD	< LOD	< LOD	0.3064	3.37759	3.11537	1.84708	3.72053	3.83955	5.47205	3.05042	2.40553	3.39763	3.24562	2.40247	0.314281	3.34778	2.48441	1.80186	5.1885	5.20398	5.66268	6.92458	2.44981	0.37204	4.38424	8.10137	0.397836	33.1449	65.2248	26.7337	26.0079	28.6249	82.0213	19.5776	32.7113	31.6331	13.761	27.1946	18.2836
PC aa C36:6	HMDB0008690	0.0417436	< LOD	< LOD	0.0710961	0.0868434	0.0564181	0.250973	0.0332191	< LOD	< LOD	< LOD	0.0601467	0.275288	0.357467	0.330279	0.355493	0.43936	0.292359	0.373696	0.38202	0.37677	0.390807	0.31654	< LOD	0.49191	0.1725	0.40634	0.550843	0.426252	0.466747	0.392956	0.44899	< LOD	0.429412	0.517705	0.0873142	1.3266	2.77165	1.14398	1.14945	1.24063	2.25748	1.19908	1.32807	1.73493	0.516083	1.62648	0.874297
PC aa C38:0	HMDB0007893	0.104402	0.102286	0.0532719	0.103302	0.0802667	0.0592922	0.196536	0.0368716	< LOD	0.0440807	0.0483384	0.071765	1.03771	2.04215	2.41366	1.19682	2.01354	1.75001	1.52731	2.46183	2.60116	2.61814	1.45842	0.247424	2.68703	1.43974	1.46434	2.13618	1.69328	1.64681	1.50704	1.82176	0.692764	1.6297	1.65443	0.221086	2.65304	2.46682	2.96902	2.64951	2.78946	2.71188	2.36145	3.9348	3.80474	1.11198	2.7116	2.23646
PC aa C38:1	HMDB0007894	< LOD	< LOD	< LOD	0.157903	< LOD	0.0451585	0.168837	0.0448586	< LOD	< LOD	< LOD	0.598924	6.29694	8.56817	8.90279	4.88873	7.36276	7.28681	5.43341	6.88688	8.94104	8.16154	6.11293	0.602428	6.6904	6.70057	5.90499	6.63242	8.04651	6.14472	4.84214	7.28004	2.4848	6.74848	6.39578	0.644171	5.92196	8.23196	7.20723	9.36865	6.38269	6.375	5.27512	6.20921	6.93356	1.64159	7.03223	4.92847
PC aa C38:3	HMDB0008020	< LOD	0.0315772	< LOD	0.918031	< LOD	< LOD	0.109025	0.0233079	< LOD	< LOD	0.0318153	0.847108	9.65493	13.4133	12.0884	9.61623	10.2421	15.0702	9.6205	9.85471	9.66293	10.4228	8.3866	0.946244	9.70615	10.9342	7.6945	12.4076	14.6694	9.99435	7.24023	9.72956	2.30475	12.3246	9.92824	1.05026	65.9945	110.244	66.6948	86.2813	80.0052	63.9907	55.7479	54.4159	70.9842	30.6252	76.6188	56.0812
PC aa C38:4	HMDB0007988	< LOD	< LOD	< LOD	2.51096	< LOD	< LOD	0.130725	0.0700039	< LOD	< LOD	< LOD	1.5072	16.7737	27.1187	15.7566	19.478	13.7542	25.2154	15.9785	11.308	15.991	18.507	14.9906	1.52056	15.3369	19.4154	20.3999	19.7016	28.15	18.7376	12.8759	21.2135	4.78046	20.2983	18.0289	1.31977	150.555	183.518	127.465	223.392	192.137	137.271	180.117	132.967	145.193	63.6714	155.097	207.184
PC aa C38:5	HMDB0007989	< LOD	< LOD	< LOD	1.04424	< LOD	< LOD	0.138661	0.0732179	< LOD	< LOD	< LOD	0.614399	7.82593	9.86239	5.90993	7.76252	6.09612	10.6746	7.05231	5.70699	6.33339	6.79228	6.46124	0.638425	6.79075	7.14981	8.01152	9.82736	11.6555	9.07082	7.34342	9.01734	1.315	9.42486	8.81061	0.646105	64.4459	100.401	57.2247	80.0274	76.327	88.2634	75.0008	53.755	66.6297	29.0951	62.4404	82.0911
PC aa C38:6	HMDB0007991	0.0635936	0.0671628	0.0621627	1.56018	< LOD	< LOD	0.199351	0.0545124	< LOD	0.0549428	< LOD	0.664901	8.58635	8.18295	7.88622	7.76819	9.12052	10.0381	8.6225	7.91054	8.1831	9.54174	9.0644	0.646068	7.60268	6.72651	6.08997	11.0521	13.5638	11.1976	7.85386	6.71942	2.10699	12.6676	10.1429	0.739649	78.6602	92.5851	87.6325	75.1369	98.4889	96.5226	61.6045	76.5325	75.6609	33.8964	85.923	64.2425
PC aa C40:1	HMDB0007993	0.10815	0.0346078	< LOD	< LOD	< LOD	0.125193	0.0600016	0.0193999	< LOD	< LOD	0.072014	0.0450842	0.580767	0.830492	0.861497	0.679701	0.701984	0.802991	0.610819	0.761058	0.991213	0.91874	0.743318	0.148702	0.600355	0.733503	0.724204	0.873056	0.762787	0.738069	0.686171	0.784273	0.133151	0.73877	0.619745	0.165352	0.344752	0.422927	0.357762	0.258592	0.477149	0.317904	0.43554	0.217979	0.512729	0.072885	0.446789	0.284762
PC aa C40:2	HMDB0008688	< LOD	0.0278612	< LOD	< LOD	< LOD	0.0278577	0.0687045	0.0173951	< LOD	< LOD	< LOD	0.124432	0.589105	1.17328	0.923945	0.553321	0.965924	0.959068	0.727688	0.772989	1.10475	0.992832	0.762465	0.108867	0.924595	0.926524	0.97775	1.01004	1.02498	0.779877	0.726776	1.04042	0.288367	0.73812	0.854344	0.10358	0.44333	0.349575	0.388934	0.451001	0.395911	0.3794	0.336874	0.352681	0.303972	0.0615781	0.319812	0.299584
PC aa C40:3	HMDB0008086	< LOD	< LOD	< LOD	< LOD	0.0724982	0.0465061	0.173589	0.0326068	0.0421422	< LOD	0.0368638	< LOD	0.397972	0.655574	0.570094	0.465631	0.632891	0.790752	0.514612	0.448203	0.695493	0.565909	0.519995	< LOD	0.596254	0.571511	0.569921	0.719116	0.652649	0.581954	0.461112	0.649205	0.148102	0.663406	0.593506	0.125732	0.61812	1.25948	0.627084	1.15776	0.975869	0.78044	0.719239	0.608066	0.890876	0.215336	0.647924	0.721192
PC aa C40:4	HMDB0008054	0.0480788	< LOD	< LOD	0.0909897	0.0567922	< LOD	0.165756	0.0205343	0.0474867	0.0414344	< LOD	0.0212938	0.591489	1.08337	0.73278	0.621969	0.729432	1.00731	0.658735	0.665145	0.723243	0.78485	0.511715	< LOD	0.668543	0.731791	0.642579	0.85591	1.10109	0.790277	0.616087	0.775303	0.246825	0.822362	0.733617	0.111887	3.56434	5.34999	3.43731	6.18297	4.24973	3.98898	3.1035	2.51211	3.23833	1.21937	3.32226	3.6467
PC aa C40:5	HMDB0008055	< LOD	< LOD	< LOD	0.197697	< LOD	< LOD	0.182355	0.0259568	< LOD	< LOD	0.0488069	0.0625026	0.916477	1.60265	1.21274	1.07368	1.02732	1.98422	1.05811	0.940295	0.980122	1.25581	0.936214	0.125846	1.06681	1.16246	1.02074	1.27593	1.732	1.04944	1.10705	1.05847	0.17815	1.44046	1.24765	0.137785	8.89362	12.1908	8.69805	13.7149	12.5208	13.5219	8.00625	7.45336	8.79852	3.54189	9.3345	9.48571
PC aa C40:6	HMDB0008057	0.0541988	< LOD	< LOD	0.392893	< LOD	< LOD	0.162264	0.0470226	< LOD	< LOD	< LOD	0.200524	1.96634	2.59913	2.52017	2.27402	2.55461	4.08125	2.30499	2.31352	2.39598	3.38844	2.25115	0.0655914	2.10353	2.10327	1.4918	2.81991	4.65842	2.88044	2.0185	1.78676	0.83061	3.54249	2.9781	0.24837	23.1877	23.1844	25.4887	24.2331	35.3955	28.935	14.7911	21.0325	20.3951	7.90609	23.5163	15.8454
PC aa C42:0	HMDB0008058	< LOD	< LOD	< LOD	< LOD	0.0529361	0.0510692	< LOD	0.0337308	< LOD	< LOD	< LOD	< LOD	0.0940374	0.427853	0.294667	0.233846	0.282315	0.267395	0.279223	0.254326	0.383541	0.309095	0.126411	0.0621008	0.174902	0.296929	0.311723	0.267904	0.331039	0.272708	0.097492	0.373515	< LOD	0.324578	0.1847	0.0812724	0.271617	0.354259	0.408979	0.206811	0.446841	0.36821	0.39936	0.393407	0.580648	0.147219	0.342112	0.415722
PC aa C42:1	HMDB0008059	< LOD	< LOD	< LOD	< LOD	< LOD	< LOD	< LOD	0.0516585	< LOD	< LOD	< LOD	< LOD	0.0568774	0.31066	0.208117	0.208612	0.172185	0.211133	0.197738	0.202155	0.150448	0.31296	0.155553	< LOD	0.154143	0.268002	0.268636	0.278086	0.311347	0.264301	0.116367	0.319515	< LOD	0.165323	0.243338	< LOD	0.182751	0.22908	0.104718	0.164456	0.29755	0.232156	0.214701	0.253072	0.359253	< LOD	0.16706	0.271163
PC aa C42:2	HMDB0008092	< LOD	< LOD	< LOD	< LOD	0.0687614	0.0532046	0.050447	0.0229255	0.0620788	< LOD	0.0232109	0.0478603	0.152629	0.23525	0.238515	0.195002	0.0917416	0.296767	0.226268	0.18175	0.28073	0.310935	0.112206	< LOD	0.237177	0.16519	0.128388	0.29492	0.0914989	0.227954	0.204601	0.210238	< LOD	0.23118	0.230659	< LOD	0.170017	0.209527	0.176557	0.137535	0.16426	0.141619	0.126638	0.181523	0.266802	< LOD	0.098277	0.188095
PC aa C42:4	HMDB0008191	< LOD	0.0432123	0.0535751	< LOD	0.0860309	< LOD	0.092988	0.0186352	< LOD	0.028438	< LOD	0.029616	0.0772498	0.174465	0.179147	< LOD	0.0749231	0.128442	0.023745	0.0760749	0.17609	0.157807	0.114591	0.0304495	0.0545276	0.149427	0.0995421	0.178701	0.0429803	0.14651	0.0391796	0.189972	< LOD	0.210503	0.140042	< LOD	0.193522	0.217754	0.160391	0.212232	0.202619	0.115494	0.202642	0.0721406	0.215745	0.141287	0.0792222	0.196574
PC aa C42:5	HMDB0008257	0.0495493	0.105048	0.0353789	0.187442	0.198274	0.136587	0.28515	0.0180626	< LOD	< LOD	< LOD	0.124097	0.0569613	0.267634	0.244941	0.173353	0.273583	0.0904095	0.240339	0.199929	0.343541	0.3186	0.210889	0.0347423	0.297303	0.267899	0.145423	0.296978	0.227487	0.279068	0.255334	0.136386	0.240581	0.25174	0.27	0.026433	0.422682	0.347504	0.308735	0.385691	0.375228	0.355497	0.275423	0.290735	0.197692	0.170529	0.167795	0.301882
PC aa C42:6	HMDB0008288	0.0967838	< LOD	< LOD	< LOD	< LOD	< LOD	0.0813235	0.0360073	< LOD	0.0655502	< LOD	< LOD	0.0392662	0.473102	0.366256	0.199175	0.339722	0.328985	0.18934	0.278779	0.368267	0.438981	0.243217	< LOD	0.315445	0.340305	0.438584	0.36028	0.2077	0.363402	0.356072	0.436711	0.114676	0.292942	0.269021	< LOD	0.333815	0.420044	0.376918	0.489227	0.494838	0.399972	0.361435	0.360641	0.363115	0.213093	0.173785	0.32035
PC ae C30:0	HMDB0013341	0.14211	< LOD	< LOD	< LOD	< LOD	< LOD	0.219335	0.095889	0.38743	0.363131	0.398889	0.282003	0.851981	1.12848	1.32138	1.11505	1.3078	1.02735	1.2887	1.12977	1.17627	1.01583	0.830905	0.301009	1.33639	1.05562	1.17753	1.32717	0.957612	1.07035	1.04842	1.08528	0.629526	1.12546	0.997727	0.18957	0.686493	1.19865	0.846831	0.912457	0.473424	1.22671	0.6106	0.651584	1.14095	0.240169	0.887446	0.742371
PC ae C30:1	HMDB0013402	0.0436146	< LOD	< LOD	0.120813	< LOD	0.0839338	0.0979331	0.0364362	0.081326	0.0960168	< LOD	0.600107	2.23161	2.59717	2.13563	2.52406	2.78059	1.96666	2.79746	1.93671	2.63282	2.21101	1.94122	0.583032	2.29992	2.53043	1.97229	2.35751	2.89155	2.01693	2.00954	2.38321	0.625523	2.62724	2.58563	0.622353	3.92157	5.46261	4.63082	4.71121	3.87509	4.65559	3.5805	4.34982	4.70802	1.68527	6.42221	3.60065
PC ae C30:2	HMDB0013410	< LOD	< LOD	< LOD	< LOD	< LOD	< LOD	0.215479	0.0287421	< LOD	< LOD	< LOD	< LOD	0.302762	0.727364	0.53833	0.316471	0.54757	0.340905	0.401379	0.537706	0.676745	0.60467	0.296253	0.0875333	0.466171	0.559863	0.624782	0.454556	0.454358	0.437274	0.497004	0.485855	0.137369	0.544906	0.53982	0.118536	0.268356	0.372368	0.263705	0.252064	0.195163	0.149604	0.142662	0.24478	0.302193	0.0666496	0.15574	0.255951
PC ae C32:1	HMDB0013404	< LOD	< LOD	< LOD	0.0947423	< LOD	< LOD	0.23818	0.0364772	< LOD	< LOD	< LOD	0.197708	2.02186	2.42552	2.23584	2.38739	2.56974	2.2186	2.44964	1.86393	2.10528	2.28645	1.84175	0.331961	1.95722	2.33188	1.99893	2.05649	2.7783	2.13899	1.70131	2.42428	0.715041	2.51807	2.41013	0.355439	5.91273	8.12078	6.18589	7.22816	4.75116	6.36479	5.92073	5.03366	6.88637	2.20413	7.53134	5.69981
PC ae C32:2	HMDB0013411	< LOD	< LOD	< LOD	< LOD	0.0560435	< LOD	0.0437041	0.0387231	< LOD	< LOD	< LOD	< LOD	0.226716	0.438745	0.567489	0.351065	0.520626	0.42054	0.413362	0.375319	0.429768	0.582424	0.403619	< LOD	0.508297	0.422743	0.452315	0.517799	0.836602	0.537923	0.455654	0.576417	0.111564	0.319091	0.518403	0.0512505	1.22263	1.63553	1.14221	1.24764	1.13272	1.0175	1.12887	1.16247	1.4934	0.324424	1.4708	1.47722
PC ae C34:0	HMDB0013405	0.0750492	< LOD	< LOD	0.0812647	0.108819	0.0788528	0.351234	0.0731388	< LOD	< LOD	< LOD	0.250447	2.15723	2.69534	2.41133	1.99045	2.53726	2.34474	2.37331	1.84736	2.29975	2.02642	2.03617	0.236947	2.18352	2.57832	2.01108	2.30749	2.36801	1.98129	1.9781	2.23644	0.540147	2.17834	2.07748	0.379144	3.19842	6.19292	3.40742	3.73212	2.37402	5.4069	2.94402	2.53472	4.15067	1.17606	4.42277	3.09797
PC ae C34:1	HMDB0013412	0.0838138	0.0725784	< LOD	0.349522	0.0706042	< LOD	0.196691	0.0372897	< LOD	< LOD	< LOD	0.616902	5.44713	6.11474	6.28818	5.16751	6.38477	7.04272	6.23782	5.12928	4.92993	3.89632	4.51453	0.613985	5.90432	6.58339	5.32211	5.789	5.84443	5.08911	5.22268	6.19506	1.06938	6.02356	5.66333	0.702745	15.8768	31.2883	15.3236	17.0588	12.5398	23.3552	17.0885	13.857	20.8863	6.59856	19.8754	17.1779
PC ae C34:2	HMDB0011151	< LOD	< LOD	< LOD	0.335917	0.150424	0.110362	0.208022	0.0334079	0.0721868	< LOD	< LOD	0.343465	3.51962	4.68685	5.48539	2.76408	4.20604	4.13549	3.95058	4.67003	4.47839	3.81787	3.03003	0.444373	5.31631	3.85431	3.37539	3.77443	4.31746	3.00237	3.27135	4.494	1.26116	4.4901	3.81362	0.496369	16.3142	23.2225	14.5557	17.8107	10.0977	19.5081	18.7139	20.259	29.4715	5.33078	16.8731	15.6543
PC ae C34:3	HMDB0013413	< LOD	< LOD	0.0551637	0.101353	0.0345447	< LOD	0.24036	0.0259879	< LOD	0.063089	< LOD	0.0694868	1.53603	2.34295	2.71795	1.13548	1.7157	1.96231	1.2519	2.17164	1.74618	2.37037	1.14396	0.189291	1.97471	1.86614	1.33737	2.31702	1.71061	1.36028	1.48018	1.7755	0.694291	1.95024	1.52666	0.194558	10.2058	16.9187	8.79647	12.8673	7.21906	12.3174	9.85684	9.25786	15.4933	3.38424	8.71164	8.43657
PC ae C36:0	HMDB0013406	< LOD	< LOD	< LOD	< LOD	< LOD	< LOD	0.142212	0.0476892	< LOD	< LOD	< LOD	0.174108	1.10417	1.80625	1.80745	1.56913	2.05081	1.73771	1.93746	1.80958	1.7535	1.52515	1.25318	0.122359	2.02913	1.52246	1.58913	2.13946	1.69432	1.57653	1.50096	2.0004	0.468522	1.54042	1.48608	0.139393	2.08092	3.59342	2.03905	1.90003	1.81151	2.56579	1.75933	1.97474	2.23819	0.888593	2.29719	1.90597
PC ae C36:1	HMDB0013414	< LOD	0.064619	0.135566	0.344652	0.171657	0.0584345	0.136928	0.0468104	< LOD	< LOD	0.129506	0.73624	4.58623	7.61498	7.88038	6.07759	7.67716	6.79162	6.95605	7.13522	7.15972	6.91993	5.66904	0.727541	8.1834	6.65036	6.45349	7.9784	6.56154	6.03027	5.90055	7.86897	1.83853	6.38595	5.65011	0.715928	11.8285	19.5799	11.4179	12.0756	10.4777	17.7797	10.516	9.91814	13.45	4.94307	15.2761	12.1985
PC ae C36:2	HMDB0013418	< LOD	< LOD	< LOD	0.36517	< LOD	0.0233187	0.184153	0.0220103	< LOD	< LOD	< LOD	0.639599	4.32578	6.45936	6.71326	4.18623	6.32065	5.06232	5.86006	6.4377	6.29509	6.06395	4.68629	0.503443	7.47145	5.80507	5.02231	5.95545	4.66233	4.75948	4.9545	6.10394	1.54735	5.77539	5.01062	0.554106	16.8589	23.0142	15.5267	19.3334	12.8961	22.403	17.0588	18.1755	24.7104	7.16411	18.8714	16.888
PC ae C36:3	HMDB0013425	0.0394565	0.0190549	< LOD	0.31155	0.0198025	< LOD	0.082149	0.0138781	< LOD	< LOD	0.0246593	0.182453	1.72671	2.25531	2.59396	1.51068	2.16865	2.22483	1.96457	2.09444	2.15154	1.91521	1.52438	0.233902	2.98759	2.0763	1.54723	2.08933	1.92184	1.65009	1.53947	2.3803	0.480699	2.21329	1.80046	0.15196	11.0663	15.472	9.15936	12.2797	7.12968	11.2805	12.5268	14.5694	18.2226	3.85338	11.3868	10.1417
PC ae C36:4	HMDB0013407	< LOD	0.0405344	0.0339757	0.688094	0.0733626	< LOD	0.216789	0.0255764	< LOD	< LOD	< LOD	0.313741	3.23584	4.62902	4.2895	3.19512	3.64946	4.74897	3.63498	3.18702	5.07692	3.47198	2.77537	0.251673	4.54614	3.25314	3.50461	3.08811	3.78151	2.55408	2.40578	4.30489	0.864079	4.21063	3.69346	0.343726	24.0537	26.653	21.9224	31.8136	17.9724	23.9087	31.4422	36.1696	37.664	8.23069	26.3511	27.6452
PC ae C36:5	HMDB0013415	< LOD	0.0357329	0.0375613	0.489053	< LOD	< LOD	0.375583	0.0315669	0.0814306	0.0582745	0.0483551	0.137159	2.0946	2.73579	2.05378	2.20591	2.23898	2.5091	2.11102	1.7718	2.34118	2.59532	1.64626	0.197101	2.30961	1.98511	1.68906	2.37208	2.49509	1.55272	1.86835	2.34067	0.734442	2.86784	2.50026	0.181038	16.5123	19.3893	16.2837	20.6577	13.9554	20.8976	16.6515	18.1647	22.7623	5.3969	17.796	14.6548
PC ae C38:0	HMDB0013408	0.0802915	0.0621135	0.051363	0.13294	0.125582	0.0646664	0.194286	0.0247855	< LOD	< LOD	< LOD	< LOD	0.602058	1.00457	1.18715	0.721067	1.06998	0.907131	0.972932	1.14483	1.176	0.979222	0.709984	0.0993118	1.23859	0.773903	0.864497	1.17787	0.81005	0.851575	0.848441	0.979601	0.386037	0.960136	1.03345	0.134521	2.35333	3.19274	2.02504	2.10865	2.22366	3.41969	1.77616	2.70345	2.32036	1.19316	2.28523	1.69717
PC ae C38:1	HMDB0013416	0.0814774	< LOD	0.0558316	0.144365	0.0972259	0.0480015	0.170555	0.0360612	< LOD	< LOD	0.0487039	0.225794	1.49269	3.0196	3.07465	1.92897	2.81233	2.49577	2.42491	2.64622	3.08706	3.05847	1.87839	0.221928	3.01528	2.4663	2.18959	2.8928	2.37239	2.20029	1.87172	2.76372	0.789139	2.349	2.24322	0.214917	4.06574	6.23637	4.91138	5.73761	3.93881	4.43844	4.50283	4.20539	4.95529	1.255	5.27409	3.70508
PC ae C38:2	HMDB0013431	< LOD	< LOD	0.0435886	0.117187	0.0628225	< LOD	< LOD	0.0402886	< LOD	< LOD	< LOD	0.2493	1.81352	3.09405	3.42292	2.23827	3.18886	2.65815	2.98397	3.25184	3.42521	2.92106	2.15584	0.284472	3.35889	2.67435	2.62412	3.375	2.68797	2.37022	2.09191	3.14886	0.84351	3.0027	2.58962	0.346745	5.67272	8.16864	7.06735	6.45347	5.92716	5.73521	6.33794	4.95078	7.15517	2.39436	7.33324	5.4008
PC ae C38:3	HMDB0013439	< LOD	0.0374868	< LOD	0.133728	< LOD	< LOD	0.154247	0.0313966	< LOD	< LOD	< LOD	0.249898	2.05888	2.93647	2.63227	2.20213	2.34536	2.71068	2.49489	2.03224	2.59373	2.33402	1.96555	0.173373	2.60287	2.34905	2.62632	2.83988	2.27109	2.17138	2.0101	3.07892	0.497512	2.49411	1.99622	0.224685	6.5549	7.74367	6.47177	7.18211	5.48585	6.95	6.6076	6.2172	7.95665	3.04823	8.72168	6.65876
PC ae C38:4	HMDB0013420	< LOD	< LOD	< LOD	0.331691	< LOD	< LOD	0.168673	0.0333414	0.0501202	< LOD	< LOD	0.237846	2.77033	3.7651	2.94178	3.39727	2.74122	3.30267	3.13362	2.21642	2.86083	2.49487	2.77613	0.285098	3.13905	3.17802	3.38303	2.93782	3.54153	2.55038	2.40676	3.83602	0.592692	3.39549	2.86278	0.2418	17.6255	16.1276	16.7399	22.2003	16.7473	17.6933	23.5142	18.4829	20.7733	7.41365	21.369	26.4909
PC ae C38:5	HMDB0013432	0.0712627	< LOD	0.0793605	0.517187	< LOD	0.0572807	0.293756	0.0154997	< LOD	< LOD	0.0510612	0.255003	2.72032	3.42211	2.59844	2.46632	3.02013	3.75592	2.65746	2.09471	2.94513	2.52413	2.25849	0.257976	3.12413	2.55101	2.49871	2.67413	3.31173	2.51637	2.00412	3.11988	0.678728	3.33482	3.24566	0.305483	20.0858	20.9821	19.4626	24.105	19.4496	18.3813	26.1106	24.5372	26.7658	7.85773	20.665	22.9127
PC ae C38:6	HMDB0013409	1.00648	0.908113	1.12538	1.22602	1.21238	1.1782	1.94554	0.0392681	< LOD	< LOD	< LOD	0.140044	0.991021	1.38254	1.36148	1.24504	1.57903	1.4123	1.33689	1.38096	1.57611	1.77603	1.10155	< LOD	1.64919	1.01603	1.10743	1.48807	1.55448	1.29412	1.10496	1.36042	0.443281	1.48516	1.48117	0.152963	7.62977	7.97814	7.63306	7.64358	6.6799	9.16089	6.85851	10.5319	10.6564	2.77104	8.05843	6.22462
PC ae C40:1	HMDB0013433	< LOD	0.0698325	< LOD	0.0986343	0.070037	0.0904564	0.0328485	0.0173477	0.0747849	< LOD	0.055348	0.0824975	0.946574	2.00073	1.81127	1.35952	1.58447	1.55317	1.61371	1.40301	1.91616	1.73203	1.25244	0.103396	1.76764	1.25286	1.9046	1.94818	1.55678	1.58443	1.21014	2.06819	0.454459	1.35977	1.26666	0.13592	1.42299	1.95071	1.54229	1.86134	1.78591	1.79262	2.01527	1.99177	1.8619	0.615763	1.45036	2.1003
PC ae C40:2	HMDB0013437	< LOD	< LOD	0.0818729	0.0528072	< LOD	< LOD	0.172292	0.0343161	0.0747203	< LOD	< LOD	0.163358	0.826574	1.95538	1.44406	1.33979	1.34544	1.62768	1.58313	1.18873	1.67642	1.44525	0.994946	0.0561335	1.49234	1.35065	1.81958	1.62609	1.44896	1.34091	1.16677	1.93203	0.438236	1.23952	1.21984	0.0652641	1.33421	1.4341	1.82651	1.5302	1.64149	1.48891	1.27254	1.13628	1.45288	0.51049	1.5804	1.15037
PC ae C40:3	HMDB0013445	< LOD	< LOD	0.0381703	0.0966036	0.0949509	0.0500757	0.0827784	0.0226047	< LOD	0.0635419	< LOD	0.0397235	0.517359	1.17296	1.04858	0.802509	0.857933	0.94084	0.811667	0.757057	1.00086	0.983251	0.716181	0.155917	0.963122	0.771243	0.916217	1.014	0.943589	0.905601	0.745653	1.01982	0.317777	0.900309	0.982803	0.0781374	0.990746	1.10659	1.09232	1.12818	1.04596	0.934139	1.0217	1.02321	1.40953	0.229821	1.18607	1.07482
PC ae C40:4	HMDB0013442	0.0317095	0.0350257	< LOD	0.0630233	0.0716669	0.0441008	0.190421	0.0266458	< LOD	< LOD	< LOD	0.104901	0.599432	0.939576	0.848356	0.697181	0.675899	0.822208	0.82365	0.621765	0.765721	0.769685	0.597271	0.0671719	0.711618	0.635434	0.723397	0.767631	0.853269	0.644746	0.516985	0.770679	0.19301	0.798989	0.769078	< LOD	1.97044	2.02442	2.04143	2.30794	2.12973	1.8791	2.55874	2.41879	2.60115	0.705	2.78133	2.72726
PC ae C40:5	HMDB0013444	0.0657737	< LOD	< LOD	0.148947	0.0839112	0.0544044	0.0710459	0.0122505	< LOD	< LOD	0.0445548	0.101977	0.709222	1.04187	1.0654	0.839955	1.03081	0.900747	0.884408	0.814236	1.022	1.12193	0.755217	0.0405089	1.00698	0.908922	0.951428	1.06316	1.12944	0.924271	0.752004	1.06195	0.299723	1.06008	1.0254	0.123524	3.02769	2.87344	3.235	3.4148	3.23952	3.28484	3.56986	3.23548	3.9829	1.28442	3.82515	3.69358
PC ae C40:6	HMDB0013422	0.0621778	< LOD	0.102428	0.162724	0.073316	0.0649998	0.188268	0.0358497	0.0410967	< LOD	0.0389666	0.111541	0.663625	0.792332	0.838945	0.712301	0.844862	0.92152	0.835361	0.800858	0.82756	0.960254	0.698374	0.161232	0.846299	0.719306	0.650118	0.785917	1.08263	0.667655	0.543529	0.893649	0.149031	0.99837	0.758954	0.0988518	3.84341	3.08412	4.52826	3.93787	5.01264	4.90515	3.97056	4.4319	5.18993	1.72365	5.04128	4.07352
PC ae C42:0	HMDB0013423	0.103198	0.154341	0.14731	0.187293	0.217778	0.211753	0.213879	0.0397912	0.0844063	0.11515	< LOD	0.140298	0.289264	0.594623	0.419755	0.444544	0.388423	0.454546	0.435953	0.315833	0.527249	0.473797	0.287013	0.175327	0.382897	0.351362	0.480822	0.554493	0.570995	0.57465	0.506719	0.490661	0.18379	0.466706	0.31504	0.242757	0.515453	0.464221	0.507808	0.450481	0.878058	0.54641	0.509253	0.471311	0.53987	0.194585	0.540334	0.580368
PC ae C42:1	HMDB0013434	< LOD	< LOD	< LOD	0.0667455	0.128873	0.0887975	0.0376216	0.0287615	< LOD	< LOD	< LOD	0.136198	0.408756	1.06252	0.811462	0.562733	0.648198	0.728062	0.645888	0.662026	0.797847	0.904944	0.544553	0.122865	0.816322	0.640266	0.802866	0.727136	0.636913	0.698123	0.590274	0.759628	0.0623722	0.61797	0.664299	0.100979	0.399784	0.492418	0.325862	0.442493	0.350283	0.392457	0.387984	0.306225	0.265969	0.231738	0.137879	0.464571
PC ae C42:2	HMDB0013438	< LOD	< LOD	< LOD	< LOD	< LOD	< LOD	0.1045	0.03941	< LOD	< LOD	< LOD	< LOD	0.352964	0.770686	0.558692	0.441996	0.526154	0.525853	0.532103	0.538837	0.642578	0.607679	0.449955	< LOD	0.694387	0.618223	0.744962	0.544052	0.598546	0.547225	0.465419	0.80121	0.167599	0.46922	0.59651	0.0607917	0.314229	0.626478	0.385013	0.338855	0.568595	0.354203	0.228528	0.419873	0.512521	0.125679	0.432506	0.382998
PC ae C42:3	HMDB0013458	0.0531326	< LOD	< LOD	< LOD	< LOD	< LOD	0.146698	0.0435981	< LOD	< LOD	< LOD	0.0521772	0.230469	0.412316	0.504935	0.296605	0.353041	0.398717	0.396419	0.422323	0.380983	0.362052	0.289347	< LOD	0.393118	0.352093	0.383291	0.395963	0.410917	0.402204	0.335062	0.415942	0.101297	0.350054	0.312398	0.0764072	0.553238	0.663612	0.542415	0.411399	0.640784	0.342423	0.641419	0.629637	0.733356	0.280625	0.416482	0.560822
PC ae C42:4	HMDB0013448	0.0360608	< LOD	< LOD	0.0303189	0.0151114	0.0211137	0.0420988	0.0133274	< LOD	< LOD	< LOD	0.0308415	0.154889	0.318863	0.250109	0.1894	0.308422	0.156717	0.304711	0.242921	0.354434	0.107748	0.202408	0.0322881	0.128475	0.139973	0.238227	0.152445	0.287019	0.280797	0.158681	0.27848	< LOD	0.283103	0.286256	< LOD	0.452391	0.583937	0.57497	0.604588	0.631564	0.435173	0.72175	0.814029	0.745594	0.198533	0.605172	0.667878
PC ae C42:5	HMDB0013451	< LOD	< LOD	< LOD	0.0708943	0.104163	0.0573724	0.192421	0.027494	< LOD	< LOD	0.0356481	0.0880141	0.25631	0.362227	0.418023	0.315784	0.379886	0.354361	0.315821	0.288702	0.457561	0.358453	0.286192	0.0484809	0.372477	0.419043	0.276139	0.435215	0.439624	0.260512	0.28365	0.341094	0.0515338	0.432283	0.356967	< LOD	0.89312	1.01207	1.43052	0.887847	1.23718	0.760133	1.38109	1.3879	1.44223	0.467842	1.46018	1.26023
PC ae C44:3	HMDB0013449	< LOD	< LOD	0.0447609	< LOD	< LOD	0.0499474	0.0668782	0.0373512	< LOD	< LOD	0.0409363	< LOD	0.0647639	0.132237	0.115758	< LOD	0.0988372	0.15544	0.137189	0.102118	0.157227	0.137887	< LOD	< LOD	0.1291	0.0688057	0.0754085	< LOD	0.168228	0.154038	< LOD	0.134429	0.052864	0.13202	< LOD	< LOD	< LOD	0.0386388	< LOD	0.140582	0.118257	0.137861	0.111905	0.109379	0.157146	0.063947	< LOD	< LOD
PC ae C44:4	HMDB0013453	< LOD	< LOD	< LOD	< LOD	0.0790864	< LOD	0.0887783	0.021515	< LOD	< LOD	< LOD	< LOD	< LOD	0.180768	0.137626	0.117028	0.156691	0.146164	0.113954	< LOD	0.136285	0.0292821	0.0304964	0.0481193	0.157225	0.0808927	0.118671	0.14141	0.0766533	0.106889	0.0824987	0.0928632	0.053809	0.175237	0.0286911	< LOD	0.302668	0.263023	0.310441	0.226294	0.341987	0.217441	0.366355	0.395983	0.293509	0.101326	0.290948	0.326243
PC ae C44:5	HMDB0013456	0.0402628	0.0378085	0.0310306	0.0667665	0.0920583	0.0466106	0.154051	0.0219213	0.0322638	< LOD	< LOD	0.0306838	0.0763819	0.177027	0.237451	0.228729	0.166793	0.18208	0.189153	0.131009	0.232038	0.0676344	0.0344408	0.0422593	0.237319	0.0471644	0.236828	0.232473	0.28621	0.173292	0.0574591	0.24148	< LOD	0.314735	0.190129	< LOD	0.725776	0.71389	0.824915	0.702077	0.952874	0.541502	1.45594	1.03864	0.945571	0.32461	0.978999	0.812902
PC ae C44:6	HMDB0013450	0.0708432	< LOD	< LOD	0.0689934	0.0648834	0.0640874	0.0504445	0.0413842	0.0595224	0.0665025	< LOD	< LOD	0.0955357	0.191828	0.279586	0.235195	0.256854	0.276927	0.0782087	0.199905	0.255633	0.29347	0.184932	0.0624828	0.283567	0.241006	0.165709	0.231733	0.269682	0.223617	0.27837	0.280726	0.163953	0.243504	0.203662	0.0667594	0.599576	0.554076	0.692787	0.547637	0.724925	0.479753	0.803491	0.700246	0.870517	0.230719	0.520892	0.547392
SM C16:0	HMDB0010169	< LOD	< LOD	< LOD	2.29708	< LOD	< LOD	0.2281	0.102243	< LOD	< LOD	< LOD	4.79112	46.8427	53.2094	56.785	40.5943	54.9319	46.6004	49.7274	53.3135	58.4121	50.6906	41.6096	4.66073	45.3078	48.8608	46.6076	43.1639	68.6642	49.4931	31.33	55.2265	15.0796	58.0498	55.8502	5.53773	106.282	154.521	129.683	140.091	114.107	100.592	108.124	127.592	134.835	33.7213	140.871	100.114
SM C16:1	HMDB0240613	< LOD	< LOD	< LOD	0.314408	< LOD	< LOD	0.21835	0.0274934	< LOD	< LOD	< LOD	0.452228	4.70023	5.28013	5.69315	3.46832	6.31154	4.16994	4.77903	5.23749	4.8303	5.34572	3.88521	0.479021	3.88865	4.11564	4.89663	6.09948	7.28639	6.0819	3.04862	5.7642	1.4987	6.65062	5.90746	0.553774	17.1924	31.0976	20.5955	19.7253	18.5786	14.1828	18.5984	15.9567	17.4207	6.24261	18.3011	17.3131
SM C18:0	HMDB0001348	9.95544	10.397	11.2081	11.3156	15.0092	15.868	24.8573	0.127411	< LOD	< LOD	< LOD	0.776672	6.84001	7.78515	7.91404	6.07262	7.64469	7.03815	7.37438	6.49235	7.56068	8.77291	6.53277	1.01889	5.28545	7.37763	6.55019	7.48799	10.6434	7.57265	5.47922	6.41391	3.36262	8.31395	7.93722	1.07489	20.423	33.8647	24.099	28.1395	22.0402	23.7867	18.8957	23.0329	19.8066	7.59908	28.0344	20.2627
SM C18:1	HMDB0012100	0.0372299	< LOD	0.0362758	0.262135	0.117963	0.15604	0.393999	0.0329763	< LOD	< LOD	< LOD	0.363665	3.24596	3.33089	3.7577	2.34515	3.30076	3.16455	2.95192	2.98319	2.91792	3.25921	2.93978	0.352906	2.09021	2.8072	3.31326	3.6614	4.69708	4.05278	2.13279	3.59077	1.03019	3.4354	3.28143	0.340006	10.5445	17.7863	11.8445	12.553	11.9509	10.0922	11.2263	9.94932	9.15463	4.77241	11.4169	11.3092
SM C20:2	HMDB0013465	< LOD	< LOD	< LOD	0.025031	0.0206396	0.0243174	0.0425771	0.017092	< LOD	< LOD	< LOD	< LOD	0.0978081	0.120767	0.10761	0.118779	0.111054	0.100881	0.120968	0.111566	0.0996352	0.0794499	0.110583	0.0252057	0.129896	0.127184	0.123458	0.123159	0.132203	0.13701	0.0456718	0.141349	< LOD	0.128271	0.130547	0.0299493	0.621578	1.29851	0.567	0.746318	0.501347	0.772848	0.853089	0.564436	0.752629	0.2574	0.745049	0.708336
SM C24:0	HMDB0011697	< LOD	< LOD	0.0503284	0.23801	< LOD	< LOD	0.161479	0.0484429	< LOD	< LOD	< LOD	0.722847	8.21642	10.0949	10.1031	5.94399	8.37163	8.37453	6.85983	8.48882	10.7092	9.67196	7.78495	0.718194	7.17599	7.99839	7.62935	7.50897	11.4559	7.91894	5.82661	8.75619	2.72678	8.70243	9.18338	0.780114	9.09942	14.2718	12.0586	15.539	11.0866	10.9688	8.85742	9.93062	11.0441	2.82132	10.5635	7.90956
SM C24:1	HMDB0012107	< LOD	0.053575	0.0905424	0.586492	0.0401979	0.0392664	0.130035	0.0247611	< LOD	< LOD	< LOD	1.19836	13.1766	15.9994	15.0666	10.6129	15.1082	14.7755	12.3613	13.8769	14.6658	13.5287	12.1047	1.14235	11.8026	14.1391	12.269	14.3997	20.1829	14.2895	9.96585	13.9452	3.98292	15.4588	16.4024	1.33728	35.5383	52.3052	44.8058	49.4057	46.6148	36.0769	33.1465	32.253	36.7014	13.183	45.1035	29.1306
SM C26:0	HMDB0011698	< LOD	< LOD	< LOD	< LOD	0.0250819	0.126099	0.244823	0.0201383	0.051076	0.0455227	< LOD	0.0858505	0.388425	0.584361	0.47593	0.34739	0.495523	0.487886	0.405822	0.406963	0.5969	0.569322	0.366137	0.0698457	0.392557	0.507729	0.469282	0.524383	0.724721	0.39444	0.394186	0.611855	0.201493	0.406508	0.488584	0.105939	0.171262	0.263447	0.212606	0.286474	0.301937	0.236256	0.0905422	0.253948	0.194144	0.112371	0.137068	0.133168
SM C26:1	HMDB0013461	< LOD	< LOD	< LOD	< LOD	0.0421016	0.0555765	0.236839	0.0292657	0.0294476	< LOD	< LOD	< LOD	0.475803	0.552283	0.594018	0.306564	0.453521	0.540818	0.327852	0.45052	0.589763	0.482609	0.51685	0.0634541	0.466501	0.463778	0.525411	0.501944	0.651692	0.540475	0.395875	0.484087	0.155743	0.509764	0.637297	0.0377037	0.324044	0.336512	0.352306	0.393036	0.352279	0.345227	0.261379	0.227942	0.30974	0.112133	0.310002	0.315577
SMOH C14:1	HMDB0013462	< LOD	0.0266783	0.0225271	0.140663	0.0299855	0.0443001	0.255923	0.019037	< LOD	< LOD	0.0205536	0.358651	3.135	3.23315	2.54169	3.1006	4.00975	2.37752	3.82319	2.74974	3.36812	2.67145	2.68754	0.344322	2.64271	3.54007	2.81325	2.90116	3.81671	2.68567	2.56871	3.01448	0.729003	3.51206	3.96357	0.337577	6.71537	9.28406	7.91132	8.13205	6.50295	8.08419	6.09055	7.40371	7.37851	2.58836	10.8709	5.45745
SMOH C16:1	HMDB0013463	< LOD	< LOD	< LOD	0.056836	< LOD	< LOD	0.306025	0.0314934	< LOD	< LOD	< LOD	0.106839	1.53251	1.64579	1.51776	1.63144	1.8909	1.42016	1.81592	1.27486	1.67736	1.64889	1.43088	0.158839	1.28318	1.89888	1.67913	1.37158	2.16922	1.35142	1.32837	1.6828	0.395155	1.75127	1.93984	0.230651	3.97327	4.20041	4.33681	4.5112	3.83732	4.83868	3.36468	3.58481	3.86793	1.39537	5.26402	3.50422
SMOH C22:1	HMDB0013466	< LOD	< LOD	< LOD	0.129686	< LOD	0.0262165	0.174402	0.0226994	0.0235589	< LOD	< LOD	0.170023	1.40271	2.11558	1.97105	1.54614	2.207	1.81882	1.90783	1.91798	2.10116	2.22438	1.41721	0.177565	2.08847	1.96358	1.89334	1.92518	2.32028	1.61825	1.58663	2.15902	0.561366	2.20764	1.9816	0.226411	5.88546	9.37277	7.48118	8.96345	6.06515	6.77086	6.68287	5.87242	7.27088	1.82783	8.13877	5.87418
SMOH C22:2	HMDB0013467	0.0253342	< LOD	< LOD	0.0688844	0.0445799	< LOD	0.0996706	0.0208241	< LOD	< LOD	< LOD	0.141044	1.33595	1.92132	1.50409	1.52205	1.76273	1.59621	1.94541	1.52546	1.65527	1.50038	1.21766	0.184254	1.56664	1.78536	1.64513	1.79434	2.267	1.60548	1.38996	2.08276	0.462486	1.96374	1.90927	0.175246	6.49519	9.16915	8.09713	7.42893	7.44704	7.25627	7.41204	5.85779	6.93986	2.855	8.91878	6.41766
SMOH C24:1	HMDB0013469	< LOD	< LOD	< LOD	0.0699215	< LOD	< LOD	0.24546	0.0211056	< LOD	< LOD	< LOD	< LOD	0.403166	0.949942	0.658362	0.633902	0.706107	0.678106	0.654323	0.638925	0.760705	0.733807	0.687541	0.0731539	0.7044	0.603439	0.769692	0.79273	0.808233	0.589993	0.566755	0.809735	0.174597	0.611457	0.691627	0.0643203	0.823623	1.02251	1.14003	1.25232	1.10291	1.04569	0.750076	0.841288	0.838577	0.257887	1.04467	0.888768
[truncated: 34 more columns]

## Sheet: DFI 2 
		Calculated Concentration (µM)								ID#122737	ID#122738	ID#122739	ID#122740	ID#122741	ID#122742	ID#122743	ID#122744	ID#122745	ID#122746	ID#122747	ID#122748	ID#122749	ID#122750	ID#122751	ID#122752	ID#122753	ID#122754	ID#122755	ID#122756	ID#122757	ID#122758	ID#122759	ID#122760	ID#122761	ID#122762	ID#122763	ID#122764	ID#122766	ID#122767	ID#122768	ID#122769	ID#122770	ID#122771	ID#122772	ID#122773	ID#122774	ID#122775	ID#122776	ID#122777
Measure Name	HMBD ID	QC-1[1]	QC-2[1]	QC-3[1]	QC-2[1]-QC_2	QC-2[1]-QC_2	QC-2[1]-QC_2	QC-2[1]-QC_2	LOD	Exp_DBS_0_1_1	Exp_DBS_0_2_1	Exp_DBS_0_3_1	Exp_DBS_pool_1_1	Exp_5_A_1	Exp_2_F_1	Exp_9_F_1	Exp_11_F_1	Exp_8_A_1	Exp_2_A_1	Exp_11_A_1	Exp_9_A_1	Exp_3_F_1	Exp_4_F_1	Exp_5_F_1	Exp_DBS_pool_2_1	Exp_3_A_1	Exp_6_A_1	Exp_1_F_1	Exp_7_F_1	Exp_10_F_1	Exp_7_A_1	Exp_6_F_1	Exp_1_A_1	Exp_4_A_1	Exp_10_A_1	Exp_8_F_1	Exp_DBS_pool_3_1	Exp_Serum_pool_1_1	Exp_7_SF_1	Exp_10_SA_1	Exp_2_SF_1	Exp_10_SF_1	Exp_6_SF_1	Exp_1_SA_1	Exp_3_SF_1	Exp_3_SA_1	Exp_ 5_SA_1	Exp_11_SA_1	Exp_1_SF_1
CE(14:0)	HMDB0006725	< LOD	< LOD	1.14771	< LOD	< LOD	< LOD	9.10047	0.234925	0.395848	< LOD	0.675605	1.95548	0.614704	7.69836	7.37297	9.84863	4.70066	3.7528	11.0963	7.55566	4.62647	7.61578	3.17857	0.845752	14.3604	9.12859	6.04212	8.5687	5.97815	4.09692	5.66978	4.79607	< LOD	15.8735	7.81443	< LOD	62.5325	219.992	101.809	98.2216	48.9347	124.398	45.6792	54.3151	161.997	10.8725	88.0842	53.701
CE(14:1)	HMDB0010367	< LOD	< LOD	< LOD	< LOD	0.502339	0.47336	7.10684	0.24212	< LOD	< LOD	< LOD	0.550701	< LOD	< LOD	< LOD	< LOD	0.626041	1.17737	1.29868	1.04794	0.456799	0.464565	0.434921	0.263034	0.942224	< LOD	< LOD	< LOD	< LOD	0.276029	0.470134	0.26175	< LOD	1.50489	0.763522	0.410382	2.90727	21.367	5.3955	7.10289	1.36574	9.69497	1.43529	3.12495	9.66637	0.264483	4.31456	1.77899
CE(15:0)	HMDB0060057	0.490646	1.06936	< LOD	< LOD	1.85539	< LOD	11.9066	0.179803	< LOD	0.391914	< LOD	< LOD	1.2128	0.314266	1.6387	4.50843	1.47994	< LOD	3.747	2.49232	0.767385	2.10733	< LOD	1.04877	2.28544	2.61606	3.25392	4.92909	0.710888	< LOD	1.66174	0.66127	0.596944	3.88083	2.87024	2.34777	17.9186	41.3156	30.3957	25.6515	12.0916	39.1428	16.3382	15.3199	37.6729	3.49	30.1437	14.3049
CE(15:1)	HMDB0060056	< LOD	< LOD	0.290895	0.675388	0.38764	< LOD	4.94651	0.0758509	0.172673	< LOD	0.114415	0.0947893	0.209014	0.901626	0.395133	0.636072	1.0788	0.444821	0.252558	1.52963	0.340373	0.704583	0.181467	< LOD	0.959407	1.3453	0.331601	0.205727	0.675579	0.426366	0.449456	0.174759	0.548625	1.17337	0.98105	< LOD	0.443392	6.19646	1.56112	2.58163	1.37635	3.39051	1.27929	1.10227	0.636717	0.761396	3.42841	0.320083
CE(16:0)	HMDB0000658	< LOD	< LOD	< LOD	8.59312	6.51302	2.59678	14.9565	0.43451	2.1762	< LOD	2.78155	4.21664	37.0826	90.5478	66.0286	72.6077	70.5098	76.0576	80.304	91.0074	68.6355	75.4858	37.9185	2.24956	82.5158	56.5465	62.3427	85.1938	85.4492	62.99	59.7305	68.5903	19.9622	102.881	64.9135	2.50715	534.931	886.952	663.341	736.174	568.77	549.203	505.187	594.342	831.794	187.663	728.269	508.456
CE(16:1)	HMDB0000658	< LOD	< LOD	< LOD	2.90543	< LOD	< LOD	1.98629	0.596334	< LOD	< LOD	< LOD	2.98656	7.92626	35.9012	16.2653	32.9203	24.5828	44.5438	31.559	24.1658	11.9684	14.2927	11.8417	1.9691	23.2964	26.0389	15.1037	50.461	22.8389	23.7289	27.1788	16.7234	1.80467	32.4124	23.7489	3.20097	252.237	1576.98	235.385	414.018	177.623	442.062	189.141	178.268	365.063	53.9609	363.151	164.941
CE(17:0)	HMDB0060059	19.7599	18.6992	19.8844	18.9915	20.3202	21.9307	33.491	0.126409	< LOD	< LOD	< LOD	< LOD	< LOD	1.99044	0.312356	2.20115	4.04276	0.964944	1.47616	3.7648	2.98219	3.80843	< LOD	< LOD	1.56618	1.37684	2.28562	1.4112	1.62072	3.45299	0.784799	0.764317	0.613696	3.56356	0.741324	< LOD	10.455	27.4275	12.1322	17.1996	10.3651	19.1078	8.495	13.8343	18.9499	2.46185	14.1222	8.93281
CE(17:1)	HMDB0060060	< LOD	< LOD	< LOD	0.274004	0.563504	0.259387	3.06115	0.256212	< LOD	< LOD	< LOD	< LOD	0.460867	3.6638	1.5309	2.60321	0.79501	4.70551	1.26207	3.24259	1.10702	2.66849	< LOD	< LOD	2.85318	3.49501	1.63569	3.50267	1.23934	1.67781	2.65087	1.17629	0.794152	2.4265	2.11233	< LOD	20.6499	63.9015	18.1102	30.4849	12.7518	37.273	17.3513	19.0766	35.3077	3.36556	25.325	15.0172
CE(18:0)	HMDB0010368	< LOD	0.312745	< LOD	0.772099	< LOD	< LOD	11.7664	0.231671	< LOD	< LOD	< LOD	< LOD	2.8331	4.08559	2.91876	6.12921	8.01144	8.90456	5.69119	7.88907	7.24377	8.18973	0.468932	< LOD	8.26529	2.49052	4.80819	9.25721	8.96415	6.39449	2.88276	6.55177	4.16657	5.14542	3.98895	< LOD	60.3712	160.043	68.9218	77.1764	58.4761	61.6823	45.7353	58.1677	86.9086	18.5818	83.3794	46.6292
CE(18:1)	HMDB0000918	0.440229	< LOD	< LOD	16.5518	16.2139	9.44982	16.8795	0.368041	< LOD	< LOD	< LOD	9.1352	85.8178	159.824	115.484	140.271	158.458	159.163	174.187	172.22	122.995	140.892	76.3303	7.52947	156.92	110.203	109.371	202.954	181.16	152.805	96.1827	122.159	31.2221	199.655	130.156	13.9211	1312.59	4178.47	1697.34	1892.88	1458.99	1546.07	1217.85	1339.57	2224.71	421.947	2010.39	1126.49
CE(18:2)	HMDB0000610	< LOD	< LOD	< LOD	45.8465	18.7118	35.6167	26.155	0.510293	< LOD	< LOD	< LOD	19.0772	135.724	316.237	314.865	199.798	284.971	184.056	258.817	354.19	256.674	353.224	139.493	21.244	331.305	219.228	172.937	255.764	258.33	235.735	156.23	213.446	79.8728	353.438	263.75	23.4368	2538.72	4949.12	3199.73	4071.82	2237.72	2690.6	2678.01	3202.95	5703.97	757.035	3405.5	2304.72
CE(18:3)	HMDB0010369	< LOD	< LOD	< LOD	1.61004	2.03371	0.809935	5.42241	0.2176	< LOD	< LOD	< LOD	1.53673	4.48701	18.4103	9.09275	10.3641	11.3539	23.4987	11.4964	14.2549	8.98023	15.6496	5.4936	1.11293	15.5412	12.4648	6.66925	14.8777	13.9701	9.86431	9.06023	8.20601	2.5064	13.0013	12.3581	1.49589	112.623	516.602	103.93	222.94	93.7419	171.503	98.0079	103.469	276.703	23.6211	104.094	84.9766
CE(20:0)	HMDB0006740	< LOD	0.521762	0.582551	< LOD	3.4099	1.2631	2.57448	0.258162	0.802517	< LOD	< LOD	4.27111	17.0951	64.4634	76.8663	25.5848	72.7005	37.0186	57.0847	82.7719	64.7808	99.2968	26.2485	3.38927	78.0312	44.7096	39.8636	47.2487	34.9087	46.6659	31.922	49.0521	23.5699	53.133	53.7844	4.65854	2.71564	1.44418	2.48629	3.74403	2.69261	1.78148	3.93811	3.87031	3.47396	1.09084	1.71222	4.63449
CE(20:1)	HMDB0005193	0.359482	< LOD	< LOD	< LOD	< LOD	0.916268	3.83763	0.143467	< LOD	< LOD	< LOD	2.33741	8.16874	35.2781	32.6294	12.2476	28.4568	17.3515	22.3971	30.3774	30.3078	44.4537	9.03754	1.44079	32.3061	21.5155	21.0301	23.8822	20.3542	22.3487	16.5455	24.19	11.6928	28.426	24.4677	1.06726	0.624807	4.33217	0.614559	0.769269	1.42453	1.44843	1.00153	1.28835	0.347312	< LOD	2.13656	3.15408
CE(20:3)	HMDB0006736	< LOD	0.122469	< LOD	1.13558	0.922772	0.623378	4.51463	0.111013	< LOD	< LOD	< LOD	0.820997	5.33766	8.46599	6.58811	7.55532	4.29983	7.4957	5.929	4.77902	6.00438	4.4561	3.01518	0.547254	6.40087	5.16571	4.07968	9.30767	8.19867	5.51125	2.94975	4.13057	1.96192	9.60135	6.33696	0.618549	75.453	165.057	99.8149	131.564	83.2791	86.9362	78.4177	80.8065	117.987	25.904	119.212	63.8542
CE(20:4)	HMDB0006726	< LOD	< LOD	< LOD	10.9049	6.35681	5.36209	6.04303	0.11061	0.183628	< LOD	< LOD	3.55024	33.4865	71.7276	39.1241	61.0721	35.0941	50.6667	50.2209	32.1249	46.8247	57.1722	34.5168	3.8533	46.6198	41.8784	59.4725	59.3446	73.5408	46.9588	29.4931	59.3901	11.4711	68.9131	53.9262	3.36383	594.812	930.357	745.571	1167.32	788.579	711.8	914.837	751.841	957.86	197.181	816	907.576
CE(20:5)	HMDB0006731	< LOD	< LOD	< LOD	1.00992	< LOD	< LOD	4.94345	0.512766	< LOD	< LOD	< LOD	0.821116	1.90848	4.11392	2.19184	4.57574	3.02591	5.85934	2.68902	2.85816	4.08246	6.78804	1.43072	< LOD	5.41974	2.57704	1.56926	5.97012	8.72692	6.98632	7.07607	2.27935	0.634509	6.56322	10.4469	< LOD	59.7836	124.167	71.9491	58.8536	98.3378	171.209	34.0492	61.2899	116.115	12.4316	57.0361	20.9842
CE(22:0)	HMDB0006727	< LOD	< LOD	< LOD	< LOD	< LOD	0.318774	9.50187	0.229353	< LOD	< LOD	< LOD	1.24764	0.564858	1.38081	0.952656	< LOD	2.48362	1.44954	0.650255	2.12394	0.639227	0.844086	< LOD	0.342762	0.884996	1.64569	1.32833	0.848254	1.04454	< LOD	0.646247	1.35714	< LOD	0.638596	1.18496	0.753278	< LOD	< LOD	0.234189	0.274195	0.246004	0.485483	0.636152	< LOD	0.314994	0.287916	1.43467	< LOD
CE(22:1)	HMDB0010372	< LOD	< LOD	< LOD	0.177035	0.472444	0.2258	7.29575	0.13651	< LOD	< LOD	< LOD	0.401837	0.96331	1.58346	< LOD	0.781599	1.70413	0.604434	1.25934	1.28614	0.16915	1.56726	0.943043	0.496054	0.93936	1.07935	0.341972	1.14697	0.586575	0.443341	0.464345	0.592759	< LOD	0.529209	0.881969	0.81968	1.28763	< LOD	0.190215	0.525096	0.752569	0.24605	< LOD	0.866746	0.766542	1.00466	1.18903	< LOD
CE(22:2)	HMDB0006737	0.0977044	< LOD	< LOD	< LOD	0.537558	0.100382	3.57784	0.0950271	< LOD	< LOD	< LOD	< LOD	0.895448	2.96331	2.80892	2.26885	3.4007	2.86716	2.61403	1.7436	1.62027	4.31549	1.02388	0.20865	1.39498	2.99027	3.56551	3.37254	3.85454	3.04916	1.65477	3.09918	0.301198	3.8261	3.60185	0.179233	< LOD	0.970853	< LOD	0.39383	0.190912	0.293691	0.62605	0.69086	0.626717	< LOD	0.535055	0.404989
CE(22:5)	HMDB0010374	0.22023	< LOD	< LOD	< LOD	< LOD	< LOD	3.35777	0.113718	< LOD	< LOD	< LOD	0.130602	0.461527	1.00467	1.24236	0.527662	1.03647	0.445766	< LOD	0.283551	0.876909	0.950419	0.345346	< LOD	1.17496	1.30387	0.559196	0.417523	1.13084	< LOD	0.140691	0.542511	0.363704	1.00211	0.364529	0.288456	4.64004	6.16408	6.31359	6.74816	4.79053	5.30778	4.14742	4.94932	5.35516	0.964088	4.62706	4.4382
CE(22:6)	HMDB0006733	< LOD	< LOD	< LOD	0.0902772	0.78886	0.367899	1.48457	0.063978	0.216962	< LOD	< LOD	0.345233	1.29372	3.37408	2.58037	2.55708	3.63034	2.96649	4.21682	4.43833	4.1286	6.55443	2.47544	0.168148	4.2209	2.80251	2.08981	2.46994	4.33838	2.91425	1.19109	3.44724	1.40191	4.4338	4.4923	0.548948	33.2009	39.7348	53.1943	42.7557	51.2332	42.9338	28.8819	43.4967	45.6346	9.15841	46.7092	24.1472
Cer(d16:1/18:0)	N/A	< LOD	< LOD	< LOD	< LOD	< LOD	< LOD	< LOD	0.0545054	< LOD	< LOD	< LOD	< LOD	< LOD	< LOD	< LOD	< LOD	< LOD	< LOD	< LOD	< LOD	< LOD	< LOD	< LOD	< LOD	< LOD	< LOD	< LOD	< LOD	< LOD	< LOD	< LOD	< LOD	< LOD	< LOD	< LOD	< LOD	< LOD	< LOD	< LOD	< LOD	< LOD	< LOD	< LOD	< LOD	< LOD	< LOD	< LOD	< LOD
Cer(d16:1/20:0)	N/A	< LOD	< LOD	< LOD	< LOD	< LOD	< LOD	0.0378526	0.0245247	< LOD	< LOD	< LOD	< LOD	< LOD	< LOD	< LOD	< LOD	< LOD	< LOD	< LOD	< LOD	< LOD	< LOD	< LOD	0.0249809	< LOD	< LOD	< LOD	< LOD	< LOD	< LOD	< LOD	< LOD	< LOD	< LOD	< LOD	< LOD	< LOD	< LOD	0.0310014	< LOD	< LOD	< LOD	< LOD	< LOD	< LOD	< LOD	< LOD	< LOD
Cer(d16:1/22:0)	HMDB0240682	< LOD	< LOD	< LOD	< LOD	< LOD	< LOD	0.0143389	0.0124537	< LOD	< LOD	< LOD	< LOD	< LOD	< LOD	< LOD	< LOD	< LOD	< LOD	0.0129913	< LOD	< LOD	< LOD	< LOD	< LOD	< LOD	< LOD	< LOD	< LOD	< LOD	< LOD	< LOD	< LOD	< LOD	< LOD	< LOD	< LOD	0.0250559	0.0658734	< LOD	0.0320182	< LOD	0.0276236	< LOD	0.0295275	0.0589419	< LOD	0.0255325	< LOD
Cer(d16:1/24:0)	N/A	< LOD	< LOD	< LOD	< LOD	< LOD	< LOD	< LOD	0.0184655	< LOD	< LOD	< LOD	< LOD	< LOD	< LOD	< LOD	< LOD	< LOD	< LOD	< LOD	< LOD	< LOD	< LOD	< LOD	< LOD	< LOD	< LOD	< LOD	< LOD	< LOD	< LOD	< LOD	< LOD	< LOD	< LOD	< LOD	< LOD	< LOD	0.130257	0.0216022	0.0491997	< LOD	0.0556955	< LOD	0.0208271	0.0468932	< LOD	0.0195177	< LOD
Cer(d18:0/20:0)	HMDB0011764	< LOD	< LOD	< LOD	< LOD	0.0322552	< LOD	0.0309178	0.0228974	< LOD	< LOD	< LOD	< LOD	< LOD	< LOD	< LOD	< LOD	< LOD	< LOD	< LOD	< LOD	< LOD	< LOD	0.030594	< LOD	< LOD	< LOD	< LOD	< LOD	< LOD	< LOD	< LOD	< LOD	< LOD	< LOD	< LOD	< LOD	< LOD	< LOD	< LOD	0.0276508	< LOD	< LOD	< LOD	< LOD	< LOD	< LOD	< LOD	< LOD
Cer(d18:0/22:0)	HMDB0011765	< LOD	< LOD	< LOD	< LOD	< LOD	< LOD	0.0424826	0.0107609	< LOD	< LOD	< LOD	< LOD	< LOD	< LOD	< LOD	< LOD	< LOD	< LOD	0.0145773	< LOD	0.0113816	< LOD	< LOD	< LOD	< LOD	0.0211441	< LOD	0.0200505	< LOD	< LOD	< LOD	0.0113459	< LOD	< LOD	< LOD	< LOD	0.0180306	0.0112804	< LOD	< LOD	< LOD	0.0244557	< LOD	< LOD	< LOD	< LOD	< LOD	< LOD
Cer(d18:0/24:0)	HMDB0011768	< LOD	< LOD	< LOD	< LOD	< LOD	< LOD	< LOD	0.0105813	< LOD	< LOD	< LOD	< LOD	< LOD	0.0109836	< LOD	< LOD	< LOD	< LOD	< LOD	< LOD	0.0158014	< LOD	< LOD	< LOD	< LOD	< LOD	0.0129946	< LOD	< LOD	< LOD	< LOD	< LOD	< LOD	< LOD	0.0171638	< LOD	< LOD	0.0220538	< LOD	< LOD	< LOD	0.0188925	0.0109034	0.0106877	< LOD	< LOD	< LOD	0.0116718
Cer(d18:0/24:1)	HMDB0011769	< LOD	< LOD	< LOD	< LOD	< LOD	< LOD	0.0146175	0.0108435	< LOD	< LOD	< LOD	< LOD	0.036567	0.0156452	< LOD	< LOD	0.0250651	< LOD	< LOD	< LOD	0.0249712	0.0109383	< LOD	< LOD	< LOD	0.013079	< LOD	< LOD	< LOD	0.0407777	0.0117601	0.0263001	< LOD	< LOD	0.0170803	< LOD	< LOD	< LOD	< LOD	0.0209625	< LOD	0.0135961	< LOD	< LOD	< LOD	< LOD	< LOD	< LOD
Cer(d18:1/16:0)	HMDB0000790	< LOD	< LOD	< LOD	< LOD	< LOD	< LOD	< LOD	0.0319713	< LOD	< LOD	< LOD	< LOD	0.300231	0.248336	0.317566	0.181263	0.23044	0.209456	0.147297	0.278129	0.241975	0.176508	0.187261	< LOD	0.172304	0.221551	0.24611	0.201704	0.284951	0.173441	0.116057	0.309319	< LOD	0.206396	0.263507	< LOD	0.139435	0.25394	0.178465	0.20115	0.151346	0.198284	0.118244	0.207205	0.177561	< LOD	0.183341	0.152467
Cer(d18:1/18:0)	HMDB0000829	23.5098	25.7382	28.4595	20.2897	26.8574	28.4095	28.7291	0.0103834	0.0130189	< LOD	< LOD	0.0689041	0.0993955	0.0559786	0.0287925	0.048155	0.0461771	0.0589897	0.0428807	0.0479944	0.0572665	0.0466686	0.0501033	< LOD	0.0478109	0.0998532	0.0885462	0.0272368	0.0696874	0.0247379	0.0332587	0.0690887	< LOD	0.0488588	0.0432413	< LOD	0.0607068	0.0571004	0.0242614	0.0221331	0.0362062	0.0541513	0.0329434	0.057335	0.0218174	< LOD	0.039477	0.0308511
Cer(d18:1/22:0)	HMDB0004952	< LOD	< LOD	< LOD	< LOD	< LOD	< LOD	< LOD	0.0197115	< LOD	< LOD	< LOD	< LOD	0.200221	0.107745	0.199363	0.0839337	0.115943	0.155234	0.0959681	0.137518	0.175329	0.192654	0.178441	< LOD	0.0720294	0.136715	0.145429	0.110489	0.118582	0.110541	0.0828943	0.175272	0.0301541	0.150787	0.136991	< LOD	0.131346	0.327926	0.115886	0.103809	0.123355	0.1507	0.0856021	0.152816	0.192494	< LOD	0.170363	0.0923949
Cer(d18:1/23:0)	HMDB0000950	< LOD	< LOD	< LOD	< LOD	< LOD	< LOD	< LOD	0.0261954	< LOD	< LOD	< LOD	< LOD	< LOD	< LOD	< LOD	< LOD	< LOD	< LOD	0.0304712	< LOD	0.0312335	< LOD	< LOD	< LOD	< LOD	< LOD	< LOD	< LOD	< LOD	< LOD	< LOD	< LOD	< LOD	0.0322387	0.0335664	< LOD	0.075371	0.297626	0.098022	0.08622	0.0845389	0.12858	0.0900651	0.126042	0.168581	< LOD	0.127085	0.0679914
Cer(d18:1/24:0)	HMDB0004956	< LOD	< LOD	< LOD	< LOD	< LOD	< LOD	< LOD	0.0150691	< LOD	< LOD	< LOD	< LOD	0.493492	0.29075	0.430665	0.18198	0.276024	0.309856	0.198671	0.376743	0.356416	0.301367	0.401234	< LOD	0.281417	0.304438	0.308606	0.302192	0.355723	0.25355	0.156634	0.371414	0.0540945	0.312925	0.323184	< LOD	0.356285	0.820008	0.309863	0.393638	0.292341	0.416651	0.329215	0.397796	0.525207	0.0757223	0.307483	0.249138
Cer(d18:1/24:1)	HMDB0004953	< LOD	< LOD	< LOD	< LOD	< LOD	< LOD	< LOD	0.0328501	< LOD	< LOD	< LOD	< LOD	0.815177	0.447219	0.706975	0.282432	0.570038	0.419561	0.34172	0.567621	0.52054	0.345635	0.482368	< LOD	0.353052	0.487588	0.570223	0.530917	0.551444	0.505688	0.268548	0.620654	0.091118	0.464238	0.676986	< LOD	0.166924	0.282603	0.263804	0.200423	0.284713	0.207799	0.179791	0.228496	0.24195	0.130487	0.329591	0.186435
Cer(d18:1/25:0)	HMDB0004957	< LOD	< LOD	< LOD	< LOD	< LOD	< LOD	< LOD	0.119613	< LOD	< LOD	< LOD	< LOD	< LOD	< LOD	< LOD	< LOD	< LOD	< LOD	< LOD	< LOD	< LOD	< LOD	< LOD	< LOD	< LOD	< LOD	< LOD	< LOD	0.172137	< LOD	< LOD	< LOD	< LOD	< LOD	< LOD	< LOD	< LOD	< LOD	< LOD	< LOD	< LOD	< LOD	< LOD	< LOD	< LOD	< LOD	< LOD	< LOD
Cer(d18:2/22:0)	N/A	< LOD	< LOD	< LOD	< LOD	< LOD	< LOD	< LOD	0.0101411	< LOD	< LOD	< LOD	< LOD	0.011728	0.0177938	0.0157678	< LOD	< LOD	0.0128645	< LOD	0.0192965	0.0108499	0.0249979	0.0130991	< LOD	< LOD	0.0117992	0.0203545	< LOD	0.0114835	0.0110085	0.0129858	0.0347005	< LOD	0.010396	0.0157535	< LOD	0.0164834	0.0738197	0.0107071	0.0233436	0.0246528	0.0199286	0.018658	< LOD	0.0306802	0.0144038	< LOD	< LOD
Cer(d18:2/24:0)	N/A	< LOD	< LOD	< LOD	< LOD	< LOD	< LOD	< LOD	0.0104385	< LOD	< LOD	< LOD	< LOD	0.0368049	0.0337191	0.0432889	< LOD	0.0308364	0.0304158	< LOD	0.0454466	0.0361372	0.0240434	0.0583358	< LOD	0.0211816	0.0130467	0.0539197	0.0358303	0.0214717	0.02641	0.0137374	0.0568631	0.0106092	0.020474	0.0477565	< LOD	0.0635923	0.243739	0.0890869	0.0762104	0.0674445	0.0475557	0.0542932	0.0371791	0.132476	0.0249131	0.039592	0.0762922
Cer(d18:2/24:1)	HMDB0240680	< LOD	< LOD	< LOD	< LOD	< LOD	< LOD	< LOD	0.0140166	< LOD	< LOD	< LOD	< LOD	0.0861732	0.056008	0.0767324	< LOD	0.064735	0.0276135	0.041055	0.0514445	0.0464841	0.0323667	0.0376168	< LOD	< LOD	0.0537511	0.104999	0.072044	0.0474138	0.0499788	< LOD	0.0866289	< LOD	0.0428015	0.115368	< LOD	0.0289649	0.054987	0.0369278	0.0182955	0.04762	0.0152565	0.0311088	0.0159509	0.0233867	< LOD	0.0346108	0.0193184
DG(14:0_18:1)	HMDB0007014	< LOD	< LOD	< LOD	< LOD	< LOD	< LOD	0.24378	0.0884092	< LOD	< LOD	< LOD	< LOD	< LOD	< LOD	< LOD	< LOD	< LOD	< LOD	< LOD	< LOD	< LOD	< LOD	< LOD	< LOD	< LOD	< LOD	< LOD	< LOD	< LOD	< LOD	0.138628	< LOD	< LOD	< LOD	< LOD	< LOD	0.691336	1.04934	0.302179	0.215251	0.681642	1.22751	< LOD	0.262178	0.179634	0.291683	0.367965	0.360794
DG(14:0_18:2)	HMDB0007016	< LOD	< LOD	0.0666822	< LOD	< LOD	< LOD	0.186322	0.065982	< LOD	< LOD	< LOD	0.0895409	0.0767783	< LOD	< LOD	< LOD	< LOD	< LOD	< LOD	< LOD	< LOD	< LOD	< LOD	< LOD	< LOD	0.0758708	< LOD	0.0871404	< LOD	0.0695182	< LOD	< LOD	< LOD	< LOD	< LOD	< LOD	0.123762	0.104516	0.127506	0.232672	0.169867	0.24015	< LOD	0.0947006	0.121893	< LOD	0.222657	< LOD
DG(14:0_20:0)	HMDB0007020	0.190938	< LOD	< LOD	< LOD	0.143907	< LOD	0.531224	0.128127	< LOD	< LOD	< LOD	< LOD	0.464475	0.396875	< LOD	< LOD	0.188751	< LOD	< LOD	< LOD	0.323395	< LOD	< LOD	0.527752	< LOD	0.215165	0.401995	< LOD	< LOD	< LOD	< LOD	0.43848	< LOD	< LOD	< LOD	0.237899	0.50854	< LOD	< LOD	< LOD	< LOD	< LOD	0.37789	0.382455	0.557103	0.550365	0.522916	< LOD
DG(16:0_16:0)	HMDB0007098	< LOD	< LOD	< LOD	< LOD	< LOD	< LOD	1.23187	0.179951	< LOD	< LOD	< LOD	< LOD	< LOD	< LOD	< LOD	< LOD	< LOD	< LOD	< LOD	< LOD	< LOD	< LOD	< LOD	< LOD	< LOD	< LOD	< LOD	< LOD	< LOD	< LOD	< LOD	< LOD	< LOD	< LOD	< LOD	< LOD	2.48005	3.21255	1.4075	1.15495	0.544067	3.31312	0.3409	2.61437	0.98336	0.320896	1.42082	0.456307
DG(16:0_16:1)	HMDB0007099	< LOD	< LOD	0.0406717	0.0418814	< LOD	0.0530758	0.590536	0.0270961	< LOD	< LOD	< LOD	< LOD	0.181692	0.177815	0.0546276	< LOD	< LOD	0.0894367	0.174611	< LOD	0.0974262	< LOD	0.0607308	< LOD	< LOD	0.0978988	0.0614846	0.159488	< LOD	0.0727332	< LOD	< LOD	0.0553742	< LOD	0.110744	0.0420723	0.883075	1.24202	0.402558	0.223392	0.26843	1.13787	0.0775039	0.167119	0.281523	0.425467	0.425795	0.146245
DG(16:0_18:1)	HMDB0007101	0.101237	< LOD	< LOD	0.198742	0.204857	0.0827708	0.403341	0.0269698	< LOD	< LOD	< LOD	0.130907	0.502034	0.314799	0.253221	0.301182	0.343832	0.886974	0.580304	0.493091	0.507423	0.376118	0.512006	0.041049	0.0964995	0.879583	0.23654	0.92501	0.532904	0.287637	0.479855	0.285529	0.158341	0.415243	0.375357	0.0797538	8.24389	7.88136	4.21788	3.50606	5.596	7.3537	1.90375	5.61836	1.19855	4.27199	3.42003	3.63461
DG(16:0_18:2)	HMDB0007103	< LOD	< LOD	< LOD	< LOD	< LOD	0.0743041	0.268584	0.0511161	< LOD	< LOD	< LOD	< LOD	< LOD	< LOD	< LOD	< LOD	< LOD	0.071248	< LOD	0.185565	< LOD	0.282201	0.0561019	< LOD	< LOD	< LOD	< LOD	0.102802	< LOD	< LOD	< LOD	< LOD	< LOD	< LOD	0.0954583	< LOD	2.35093	1.22119	1.85377	2.08566	1.15212	1.66408	0.314859	3.19527	0.380961	0.904137	1.05662	0.604261
DG(16:0_20:0)	HMDB0007107	< LOD	< LOD	< LOD	< LOD	< LOD	< LOD	0.559599	0.033784	< LOD	< LOD	< LOD	0.0825666	< LOD	< LOD	< LOD	< LOD	< LOD	< LOD	0.142441	< LOD	< LOD	0.0526241	< LOD	< LOD	< LOD	0.0423755	0.0443632	< LOD	< LOD	< LOD	< LOD	0.0476668	< LOD	< LOD	0.0803914	< LOD	0.163374	0.168518	0.131955	0.100499	< LOD	0.139027	0.103772	< LOD	0.182653	0.0739014	0.0862545	0.149058
DG(16:1_18:1)	HMDB0007130	0.211199	< LOD	< LOD	< LOD	< LOD	< LOD	0.503995	0.158265	< LOD	< LOD	< LOD	< LOD	0.661815	0.489191	< LOD	< LOD	0.54932	0.416546	0.441057	0.164902	0.560202	0.483206	0.167524	0.359475	0.478291	0.339001	0.504451	0.268228	0.236815	0.178459	0.16333	0.492165	< LOD	0.502513	0.173338	0.366351	2.58828	2.94564	1.10644	1.33882	1.70219	1.6718	1.04721	1.40711	0.70965	2.38744	2.43574	1.4115
DG(16:1_18:2)	HMDB0007132	< LOD	< LOD	< LOD	< LOD	0.154212	< LOD	0.348553	0.0964752	< LOD	< LOD	< LOD	< LOD	< LOD	< LOD	< LOD	< LOD	< LOD	< LOD	0.0978342	0.15249	< LOD	< LOD	< LOD	< LOD	0.194286	< LOD	< LOD	< LOD	< LOD	< LOD	< LOD	< LOD	< LOD	< LOD	< LOD	< LOD	0.452928	0.365964	0.264258	0.412809	0.410284	0.317723	0.137826	0.243656	< LOD	0.337918	0.362395	0.220978
DG(16:1_20:0)	HMDB0007136	< LOD	0.0903275	< LOD	< LOD	< LOD	< LOD	0.479707	0.0747785	< LOD	< LOD	< LOD	< LOD	< LOD	< LOD	< LOD	< LOD	0.0921733	0.170971	< LOD	< LOD	< LOD	< LOD	< LOD	< LOD	< LOD	< LOD	< LOD	< LOD	< LOD	< LOD	< LOD	< LOD	< LOD	< LOD	< LOD	< LOD	< LOD	< LOD	< LOD	0.0872711	0.103851	0.142887	< LOD	0.139916	< LOD	0.103533	0.109416	< LOD
DG(17:0_17:1)	HMDB0007049	< LOD	< LOD	< LOD	< LOD	0.0183292	0.0320667	0.688429	0.0150308	< LOD	< LOD	< LOD	0.0871424	0.0316954	< LOD	0.0292992	0.0479162	< LOD	0.0956044	0.0765585	0.0636751	< LOD	< LOD	< LOD	< LOD	0.0776428	0.0346954	< LOD	0.0580502	0.0398681	0.0421275	0.063226	< LOD	0.0260111	< LOD	0.0191384	< LOD	0.0310292	0.063788	0.0183946	< LOD	0.0203992	0.0198797	< LOD	0.0183254	0.0660625	< LOD	0.0471398	< LOD
DG(17:0_18:1)	HMDB0295723	< LOD	< LOD	< LOD	0.0218165	0.0608947	0.0646412	0.50406	0.0108627	0.0270658	0.020239	0.0656646	0.0111995	0.0651165	0.0338646	0.0699514	0.113064	0.0540181	0.152484	0.0240247	0.117726	0.123041	0.035888	0.0830635	0.0152019	< LOD	0.120629	< LOD	0.161185	0.145823	< LOD	0.0993921	< LOD	0.0455613	0.112348	0.0686625	0.0242806	0.378209	0.34667	0.237364	0.150137	0.206804	0.461708	0.0833369	0.0919006	0.0481442	0.173892	0.0303178	0.220034
DG(18:0_20:0)	HMDB0007165	0.172803	< LOD	< LOD	< LOD	< LOD	< LOD	0.382424	0.17213	< LOD	< LOD	< LOD	< LOD	< LOD	< LOD	< LOD	< LOD	< LOD	< LOD	< LOD	0.201514	< LOD	< LOD	< LOD	< LOD	< LOD	< LOD	< LOD	< LOD	< LOD	< LOD	< LOD	< LOD	< LOD	< LOD	< LOD	< LOD	< LOD	< LOD	< LOD	< LOD	< LOD	< LOD	0.181492	0.237805	< LOD	0.261514	0.296462	< LOD
DG(18:1_18:1)	HMDB0007188	19.3836	23.8076	23.4546	17.9875	22.0682	23.9709	22.2629	0.0355942	< LOD	0.0406735	0.0692033	0.124777	0.923298	0.769115	0.649964	0.711493	0.815965	1.70166	0.718677	0.762867	0.697189	0.78602	0.956297	0.0653332	0.179289	1.52665	0.472577	3.022	1.06356	0.84822	0.52912	0.483503	0.0964458	0.931765	0.830021	0.0596616	16.7919	11.9735	11.9127	10.4612	18.565	11.713	6.03245	13.2786	3.07753	13.2242	8.993	10.9083
DG(18:1_18:2)	HMDB0007190	< LOD	< LOD	0.0794459	< LOD	< LOD	< LOD	< LOD	0.0160858	< LOD	< LOD	< LOD	< LOD	< LOD	0.128901	0.259601	< LOD	0.05304	0.236839	< LOD	0.0862883	< LOD	0.109313	0.128996	0.0791877	0.0551331	0.308272	< LOD	0.352428	0.0798588	< LOD	0.0806796	0.0959727	0.132305	0.345038	0.183246	< LOD	4.16765	1.60141	4.03779	4.35306	4.69398	1.94153	1.2832	5.67225	0.712532	3.07505	2.34772	2.12778
DG(18:1_18:3)	HMDB0007191	< LOD	< LOD	< LOD	< LOD	< LOD	0.0270126	0.244646	0.0212097	< LOD	< LOD	< LOD	0.0325008	< LOD	< LOD	< LOD	< LOD	< LOD	< LOD	0.040209	< LOD	< LOD	< LOD	< LOD	< LOD	< LOD	< LOD	< LOD	0.0443948	< LOD	< LOD	< LOD	< LOD	< LOD	0.0385821	< LOD	< LOD	0.120385	0.124906	0.0977251	0.238712	0.247546	0.136419	0.0642851	0.216078	0.0266978	0.0751135	< LOD	0.0527909
DG(18:1_20:3)	HMDB0007197	< LOD	0.0891757	0.0727251	0.0737458	0.0942923	0.0370356	0.217937	0.0122837	< LOD	0.0370231	0.0492172	0.0346476	< LOD	0.0132231	0.0627129	0.16776	0.0151309	0.0441719	0.163899	0.0343394	0.0557105	0.0780044	< LOD	0.0329251	< LOD	0.133788	< LOD	0.0577078	< LOD	< LOD	< LOD	0.0341341	0.0150248	0.0278528	0.0416703	< LOD	0.21661	0.0258609	0.134165	0.16077	0.23599	0.0472922	0.120373	0.0412814	0.0936452	0.170032	0.0719541	0.157245
DG(18:1_20:4)	HMDB0007199	0.0538571	0.0532579	< LOD	0.0785172	0.149235	0.0264484	0.360934	0.0109231	0.151471	< LOD	0.149882	0.0370246	0.14064	0.0634138	0.136681	0.026719	0.0196282	0.110081	0.0872112	0.0273406	0.120054	0.191102	0.215681	0.015432	0.0540691	0.134148	< LOD	< LOD	0.119449	0.0372845	0.0841748	0.129087	0.131042	0.196818	0.113125	0.0877584	0.0896429	0.045674	0.0648553	0.134529	0.0838883	0.0532524	0.114372	0.0978878	0.106389	0.121635	0.0848172	0.134338
DG(18:1_22:6)	HMDB0007208	0.106212	< LOD	< LOD	< LOD	< LOD	< LOD	0.414639	0.0673838	< LOD	< LOD	< LOD	< LOD	< LOD	< LOD	< LOD	< LOD	0.141419	< LOD	< LOD	< LOD	< LOD	< LOD	< LOD	< LOD	< LOD	< LOD	< LOD	0.0729895	0.100965	< LOD	< LOD	< LOD	< LOD	< LOD	0.111233	< LOD	< LOD	0.150712	< LOD	< LOD	< LOD	< LOD	0.091038	0.201721	0.0694361	0.072808	0.076663	< LOD
DG(18:2_18:2)	HMDB0007248	< LOD	< LOD	< LOD	< LOD	< LOD	< LOD	0.108873	0.0350626	< LOD	0.0458423	< LOD	< LOD	0.0368774	0.0483797	0.116278	< LOD	< LOD	< LOD	0.0643786	< LOD	0.109393	0.0849436	0.0537159	< LOD	0.0814101	< LOD	0.0905996	< LOD	0.110014	< LOD	< LOD	0.102561	0.091062	0.0930228	0.0453739	< LOD	1.20248	0.353919	1.51493	2.47799	0.982444	0.509884	0.546708	2.6196	0.145309	0.714377	0.513054	0.607635
Hex2Cer(d18:1/14:0)	N/A	< LOD	< LOD	< LOD	< LOD	< LOD	< LOD	0.0428791	0.0106728	< LOD	< LOD	< LOD	< LOD	0.0175332	0.0171368	0.0316967	0.0352738	0.0194825	0.0162665	0.0324895	0.0321132	0.046943	< LOD	< LOD	< LOD	0.022193	0.0128585	0.0324028	0.0144805	0.0119138	< LOD	0.0194979	0.0628138	< LOD	0.0349116	0.0208055	< LOD	0.0614773	0.0799879	0.136981	0.0810972	0.0557708	0.0755105	0.133383	0.0863658	0.167305	0.0187388	0.0507275	0.130942
Hex2Cer(d18:1/16:0)	HMDB0006750	< LOD	< LOD	< LOD	0.035616	< LOD	0.0424002	0.0500873	0.0143076	< LOD	< LOD	< LOD	0.193716	2.1047	1.91458	4.05066	1.71958	2.72413	1.94505	3.11576	2.44141	1.74799	1.26693	1.92893	0.21843	2.95627	2.13042	1.68377	1.65622	2.60704	2.00157	0.865234	2.45783	0.306448	2.49206	2.6109	0.149836	1.99479	1.74255	2.39695	2.24225	1.9508	1.44122	2.3258	2.55517	3.37967	0.883674	2.84234	1.9385
Hex2Cer(d18:1/18:0)	HMDB0011591	15.8106	15.9203	16.3116	12.386	16.7269	16.324	16.3467	0.0103689	< LOD	< LOD	< LOD	< LOD	0.0293253	0.0134263	0.0985294	0.0155681	0.0154893	< LOD	0.0649807	0.0278127	0.0149467	< LOD	0.0170136	< LOD	< LOD	< LOD	0.019494	< LOD	0.0209081	< LOD	< LOD	0.0121242	< LOD	0.0252005	0.0134304	< LOD	0.0694256	0.0708882	0.0292352	0.044172	0.0196574	0.0329802	0.0337664	0.0331069	0.0356598	< LOD	0.0438285	0.0632812
Hex2Cer(d18:1/20:0)	HMDB0011593	< LOD	< LOD	< LOD	< LOD	< LOD	< LOD	< LOD	0.0146329	< LOD	< LOD	< LOD	< LOD	< LOD	< LOD	< LOD	< LOD	< LOD	< LOD	0.0308173	< LOD	< LOD	< LOD	< LOD	< LOD	< LOD	< LOD	< LOD	0.017582	0.0267622	< LOD	0.0212975	< LOD	< LOD	< LOD	< LOD	< LOD	< LOD	< LOD	< LOD	< LOD	0.016789	< LOD	< LOD	< LOD	< LOD	< LOD	< LOD	< LOD
Hex2Cer(d18:1/22:0)	HMDB0011594	< LOD	< LOD	< LOD	< LOD	< LOD	< LOD	0.0236783	0.0118908	< LOD	< LOD	< LOD	< LOD	0.130926	0.0583582	0.207318	0.172706	0.113013	0.0574962	0.256856	0.144312	0.036496	0.0702942	0.0452697	< LOD	0.0697391	0.160835	0.0919819	0.0603864	0.162676	0.120041	0.0760116	0.137424	< LOD	0.113842	0.0573239	< LOD	0.0211962	0.0679986	0.0377613	0.0386624	0.0359466	0.0243689	0.0603639	0.0605069	0.135968	0.0292977	0.0347329	0.0555105
Hex2Cer(d18:1/24:0)	HMDB0011595	< LOD	< LOD	< LOD	< LOD	< LOD	< LOD	< LOD	0.0758198	< LOD	< LOD	< LOD	< LOD	0.280084	0.162749	0.625606	0.515824	0.233482	0.227489	0.726964	0.510489	0.094919	0.100886	0.186348	< LOD	0.233119	0.471312	0.322697	0.187086	0.259807	0.29031	0.216703	0.430836	< LOD	0.225574	0.221743	< LOD	< LOD	0.0786315	< LOD	0.0775047	< LOD	< LOD	< LOD	0.108636	0.0790126	< LOD	< LOD	< LOD
Hex2Cer(d18:1/24:1)	HMDB0004872	< LOD	< LOD	< LOD	< LOD	< LOD	< LOD	0.0235366	0.0124151	< LOD	< LOD	< LOD	0.0212935	0.677179	0.465196	1.11619	0.662401	0.718389	0.516528	1.26554	0.797272	0.23661	0.183833	0.444463	0.0234129	0.767305	0.778549	0.417622	0.525283	0.608628	0.684267	0.307048	0.721115	0.0175406	0.598677	0.558465	0.0187013	0.245226	0.174025	0.176058	0.272688	0.15618	0.196724	0.272994	0.279453	0.310787	0.11831	0.357149	0.166885
Hex3Cer(d18:1/16:0)	HMDB0004879	< LOD	< LOD	< LOD	< LOD	< LOD	< LOD	0.0192342	0.0154179	< LOD	< LOD	< LOD	< LOD	0.0541385	0.0527967	< LOD	< LOD	0.043949	< LOD	0.0172023	0.044223	0.0256933	0.0295035	< LOD	< LOD	0.0364853	< LOD	0.0431484	< LOD	0.0336986	0.0339449	< LOD	0.0483404	< LOD	0.0326882	0.078982	< LOD	0.114943	0.100488	0.132072	0.0979326	0.0994653	0.0588469	0.15561	0.0751824	0.100245	0.0183025	0.124012	0.114052
Hex3Cer(d18:1/18:0)	HMDB0004880	< LOD	< LOD	< LOD	< LOD	< LOD	< LOD	0.0175751	0.0136418	< LOD	< LOD	< LOD	< LOD	< LOD	< LOD	< LOD	< LOD	< LOD	< LOD	< LOD	< LOD	< LOD	< LOD	< LOD	< LOD	< LOD	< LOD	< LOD	< LOD	< LOD	< LOD	< LOD	< LOD	< LOD	< LOD	< LOD	< LOD	< LOD	< LOD	< LOD	< LOD	< LOD	< LOD	< LOD	< LOD	< LOD	< LOD	< LOD	< LOD
Hex3Cer(d18:1/24:1)	HMDB0004883	< LOD	< LOD	< LOD	< LOD	< LOD	< LOD	< LOD	0.0170516	< LOD	< LOD	< LOD	< LOD	0.0200515	0.0481883	< LOD	0.0274982	0.163059	0.0428985	< LOD	0.0212483	0.0400051	0.0477786	0.0218845	< LOD	0.0194589	< LOD	0.0178714	< LOD	< LOD	< LOD	< LOD	0.022145	< LOD	0.019024	0.167383	< LOD	< LOD	< LOD	< LOD	< LOD	< LOD	< LOD	< LOD	< LOD	< LOD	0.017979	< LOD	< LOD
Hex3Cer(d18:1_22:0)	HMDB0004882	< LOD	< LOD	< LOD	< LOD	< LOD	< LOD	< LOD	0.0130682	< LOD	< LOD	< LOD	< LOD	< LOD	< LOD	< LOD	< LOD	0.0209716	< LOD	< LOD	< LOD	0.0151054	< LOD	< LOD	< LOD	< LOD	< LOD	< LOD	< LOD	< LOD	< LOD	< LOD	< LOD	< LOD	0.0154773	0.0294486	< LOD	< LOD	< LOD	< LOD	< LOD	< LOD	< LOD	< LOD	< LOD	< LOD	< LOD	< LOD	< LOD
HexCer(d16:1/22:0)	N/A	< LOD	< LOD	< LOD	< LOD	< LOD	< LOD	0.0269323	0.0105782	< LOD	< LOD	< LOD	< LOD	< LOD	< LOD	< LOD	< LOD	< LOD	< LOD	< LOD	< LOD	< LOD	< LOD	< LOD	< LOD	< LOD	< LOD	< LOD	< LOD	< LOD	< LOD	< LOD	< LOD	< LOD	< LOD	< LOD	< LOD	0.0289642	0.0329359	0.0177823	0.053887	< LOD	< LOD	0.0210869	0.0175245	0.0195819	< LOD	0.0464328	< LOD
HexCer(d18:1/16:0)	HMDB0004971	< LOD	< LOD	< LOD	< LOD	< LOD	< LOD	< LOD	0.0279386	< LOD	< LOD	< LOD	< LOD	0.240366	0.195071	0.219435	0.137366	0.164265	0.154504	0.176339	0.195348	0.266837	0.180797	0.144691	< LOD	0.250318	0.163233	0.203772	0.139912	0.228005	0.185168	0.0796214	0.236483	0.0423524	0.25035	0.246436	< LOD	0.396033	0.62277	0.496934	0.525376	0.395022	0.283434	0.514607	0.645595	0.609742	0.1274	0.532969	0.414702
HexCer(d18:1/18:0)	HMDB0004972	17.7078	18.9413	20.0735	14.5481	20.3334	21.1729	20.7935	0.0180414	< LOD	< LOD	< LOD	0.0329009	0.0181636	0.0309345	0.0275515	< LOD	0.0206755	< LOD	< LOD	< LOD	< LOD	< LOD	< LOD	< LOD	< LOD	< LOD	< LOD	< LOD	0.063565	< LOD	< LOD	< LOD	< LOD	< LOD	0.0217343	< LOD	0.05921	0.0540933	0.0271278	0.0599569	0.0401672	0.0299511	0.0323396	< LOD	0.0228792	< LOD	0.0250518	0.0474481
HexCer(d18:1/18:1)	HMDB0004970	< LOD	< LOD	< LOD	< LOD	< LOD	< LOD	< LOD	0.0193242	< LOD	< LOD	< LOD	< LOD	< LOD	< LOD	< LOD	< LOD	< LOD	< LOD	< LOD	< LOD	< LOD	< LOD	< LOD	< LOD	< LOD	< LOD	< LOD	< LOD	< LOD	< LOD	< LOD	< LOD	< LOD	< LOD	< LOD	< LOD	< LOD	< LOD	< LOD	< LOD	< LOD	< LOD	< LOD	< LOD	< LOD	< LOD	< LOD	< LOD
HexCer(d18:1/20:0)	HMDB0004973	< LOD	< LOD	< LOD	< LOD	< LOD	< LOD	0.0118495	0.0109302	< LOD	< LOD	< LOD	< LOD	0.0132762	< LOD	< LOD	< LOD	< LOD	< LOD	< LOD	< LOD	< LOD	0.0210051	< LOD	< LOD	< LOD	< LOD	< LOD	< LOD	< LOD	0.011661	< LOD	< LOD	0.0143386	< LOD	0.0234133	< LOD	0.0258133	0.0380421	0.0592147	0.0662088	0.0630794	0.0471298	0.0583764	0.0395433	0.0657293	< LOD	0.0419371	0.0587622
HexCer(d18:1/22:0)	HMDB0004974	< LOD	< LOD	< LOD	< LOD	< LOD	< LOD	< LOD	0.0191149	< LOD	< LOD	< LOD	< LOD	0.0282578	0.067435	0.0585966	0.041536	0.0543894	0.0351923	0.0316035	0.0544549	0.0355519	0.0707478	< LOD	< LOD	0.0469875	0.0310905	0.0324308	0.0305599	0.0403588	0.0517816	0.0232684	0.0546153	< LOD	0.0607431	0.0573882	< LOD	0.401972	0.514724	0.389705	0.697824	0.296985	0.223123	0.432499	0.456899	0.667633	0.0914272	0.384295	0.400538
HexCer(d18:1/23:0)	N/A	< LOD	< LOD	< LOD	< LOD	< LOD	< LOD	0.0164886	0.0108428	< LOD	< LOD	< LOD	< LOD	0.0135057	0.0215879	< LOD	0.019059	0.0311075	< LOD	< LOD	0.0172512	< LOD	< LOD	< LOD	< LOD	0.0257732	< LOD	0.0134356	< LOD	< LOD	0.017997	< LOD	0.0454932	< LOD	0.0164015	< LOD	< LOD	0.156318	0.274055	0.193239	0.263751	0.121067	0.0927332	0.271301	0.181509	0.269635	0.0380251	0.21719	0.216344
HexCer(d18:1/24:0)	HMDB0004978	< LOD	< LOD	0.063834	< LOD	0.0330278	< LOD	0.043245	0.0327408	< LOD	< LOD	< LOD	< LOD	0.0506184	0.0705689	0.0996591	0.0643289	0.0875752	0.0651134	0.0486238	0.082032	0.0805935	0.0697002	0.0467721	< LOD	0.0535481	0.0378787	0.0748701	0.0605529	0.0918351	0.067458	0.0347421	0.0785824	< LOD	0.0782932	0.0829593	< LOD	0.557238	0.76824	0.619282	0.863503	0.427216	0.367018	0.691026	0.616987	0.805836	0.176381	0.589116	0.581054
HexCer(d18:1/24:1)	HMDB0004975	< LOD	< LOD	< LOD	< LOD	< LOD	< LOD	< LOD	0.104482	< LOD	< LOD	< LOD	< LOD	< LOD	< LOD	< LOD	< LOD	0.130665	< LOD	< LOD	< LOD	< LOD	< LOD	< LOD	< LOD	< LOD	< LOD	< LOD	< LOD	0.118325	< LOD	< LOD	< LOD	< LOD	0.131234	0.126763	< LOD	0.51711	0.546918	0.542297	0.637689	0.567182	0.401013	0.717642	0.531287	0.576881	0.185727	0.557689	0.528091
HexCer(d18:1/26:0)	HMDB0004977	< LOD	< LOD	< LOD	< LOD	< LOD	< LOD	< LOD	0.0370748	< LOD	< LOD	< LOD	< LOD	< LOD	< LOD	< LOD	< LOD	< LOD	< LOD	< LOD	< LOD	< LOD	< LOD	< LOD	< LOD	< LOD	< LOD	< LOD	< LOD	< LOD	< LOD	< LOD	< LOD	< LOD	< LOD	< LOD	< LOD	< LOD	< LOD	< LOD	< LOD	< LOD	< LOD	< LOD	< LOD	< LOD	< LOD	< LOD	< LOD
HexCer(d18:1/26:1)	HMDB0004976	< LOD	< LOD	< LOD	< LOD	< LOD	< LOD	0.0182589	0.010504	< LOD	< LOD	< LOD	< LOD	< LOD	< LOD	< LOD	< LOD	< LOD	< LOD	< LOD	< LOD	< LOD	< LOD	< LOD	< LOD	< LOD	< LOD	< LOD	< LOD	< LOD	< LOD	< LOD	< LOD	< LOD	< LOD	< LOD	< LOD	< LOD	< LOD	< LOD	< LOD	< LOD	0.0155204	< LOD	< LOD	< LOD	< LOD	0.0146981	< LOD
HexCer(d18:2/16:0)	N/A	< LOD	< LOD	< LOD	< LOD	< LOD	< LOD	0.0131222	0.0102683	< LOD	< LOD	< LOD	< LOD	< LOD	< LOD	< LOD	< LOD	< LOD	< LOD	< LOD	< LOD	< LOD	< LOD	< LOD	< LOD	< LOD	< LOD	< LOD	< LOD	< LOD	< LOD	< LOD	< LOD	< LOD	< LOD	< LOD	< LOD	< LOD	0.0161229	< LOD	< LOD	< LOD	< LOD	< LOD	0.0152007	< LOD	< LOD	< LOD	< LOD
HexCer(d18:2/18:0)	N/A	< LOD	< LOD	< LOD	< LOD	< LOD	< LOD	< LOD	0.0123621	< LOD	< LOD	< LOD	< LOD	< LOD	< LOD	< LOD	< LOD	< LOD	< LOD	< LOD	< LOD	< LOD	< LOD	< LOD	< LOD	< LOD	< LOD	< LOD	< LOD	< LOD	< LOD	< LOD	< LOD	< LOD	< LOD	< LOD	< LOD	< LOD	< LOD	< LOD	< LOD	< LOD	< LOD	0.0208936	< LOD	< LOD	< LOD	< LOD	< LOD
HexCer(d18:2/20:0)	N/A	< LOD	< LOD	< LOD	< LOD	< LOD	< LOD	0.0119083	0.0111282	< LOD	< LOD	< LOD	< LOD	< LOD	< LOD	< LOD	< LOD	< LOD	< LOD	< LOD	< LOD	< LOD	< LOD	< LOD	< LOD	< LOD	< LOD	< LOD	< LOD	< LOD	< LOD	< LOD	< LOD	< LOD	< LOD	< LOD	< LOD	< LOD	< LOD	< LOD	< LOD	< LOD	< LOD	< LOD	< LOD	< LOD	< LOD	< LOD	< LOD
HexCer(d18:2/22:0)	N/A	< LOD	< LOD	< LOD	< LOD	< LOD	< LOD	0.0217264	0.010903	< LOD	< LOD	< LOD	< LOD	< LOD	< LOD	< LOD	< LOD	< LOD	< LOD	< LOD	< LOD	< LOD	< LOD	< LOD	< LOD	< LOD	< LOD	< LOD	< LOD	< LOD	< LOD	< LOD	< LOD	< LOD	< LOD	< LOD	< LOD	0.0455683	0.0754101	0.0308049	0.063725	0.0331596	0.0183353	0.0833508	0.0283284	0.072472	< LOD	0.0175203	0.027592
HexCer(d18:2/23:0)	N/A	< LOD	< LOD	< LOD	< LOD	< LOD	< LOD	< LOD	0.0106985	< LOD	< LOD	< LOD	< LOD	< LOD	< LOD	< LOD	< LOD	< LOD	< LOD	< LOD	< LOD	< LOD	< LOD	< LOD	< LOD	< LOD	< LOD	< LOD	< LOD	< LOD	< LOD	< LOD	< LOD	< LOD	< LOD	< LOD	< LOD	0.0153477	0.0239606	< LOD	0.0169237	0.0146465	< LOD	0.0308319	0.0127413	0.0142518	< LOD	< LOD	0.0192834
HexCer(d18:2/24:0)	N/A	< LOD	< LOD	< LOD	< LOD	< LOD	< LOD	0.0541593	0.0198603	< LOD	< LOD	< LOD	< LOD	< LOD	0.0207992	< LOD	< LOD	< LOD	< LOD	< LOD	< LOD	< LOD	< LOD	< LOD	< LOD	< LOD	< LOD	< LOD	< LOD	< LOD	< LOD	0.0243003	< LOD	< LOD	< LOD	< LOD	< LOD	0.0763381	0.142835	0.092246	0.166504	0.0755007	0.0588378	0.130822	0.0708252	0.100517	0.0422342	0.0479828	0.0837072
TG(14:0_32:2)	HMDB0042076	0.352318	0.142926	< LOD	< LOD	< LOD	< LOD	0.183406	0.119564	< LOD	0.1729	0.205102	< LOD	< LOD	< LOD	< LOD	< LOD	< LOD	< LOD	< LOD	< LOD	< LOD	< LOD	< LOD	< LOD	< LOD	< LOD	< LOD	< LOD	< LOD	< LOD	< LOD	< LOD	< LOD	< LOD	< LOD	< LOD	< LOD	5.22636	< LOD	< LOD	< LOD	0.489344	< LOD	< LOD	< LOD	< LOD	< LOD	< LOD
TG(14:0_34:0)	HMDB0042065	< LOD	< LOD	< LOD	< LOD	< LOD	< LOD	< LOD	0.0583156	< LOD	< LOD	< LOD	< LOD	< LOD	< LOD	< LOD	< LOD	< LOD	< LOD	< LOD	< LOD	< LOD	< LOD	< LOD	< LOD	< LOD	< LOD	< LOD	< LOD	< LOD	< LOD	< LOD	< LOD	< LOD	< LOD	< LOD	< LOD	< LOD	5.66766	< LOD	< LOD	< LOD	0.603004	< LOD	< LOD	< LOD	< LOD	< LOD	< LOD
TG(14:0_34:1)	HMDB0042072	< LOD	< LOD	< LOD	< LOD	< LOD	< LOD	< LOD	0.114936	< LOD	< LOD	< LOD	< LOD	< LOD	< LOD	< LOD	< LOD	< LOD	0.189431	< LOD	< LOD	< LOD	< LOD	< LOD	< LOD	< LOD	< LOD	< LOD	< LOD	< LOD	< LOD	0.195062	< LOD	< LOD	< LOD	< LOD	< LOD	0.337381	43.3804	0.175675	0.358708	0.201972	4.23667	< LOD	0.170335	0.404293	0.134558	0.326616	0.143666
TG(14:0_34:2)	HMDB0042078	< LOD	< LOD	< LOD	< LOD	< LOD	< LOD	< LOD	0.249556	< LOD	< LOD	< LOD	< LOD	< LOD	< LOD	< LOD	< LOD	< LOD	< LOD	< LOD	< LOD	< LOD	< LOD	< LOD	< LOD	< LOD	< LOD	< LOD	< LOD	< LOD	< LOD	< LOD	< LOD	< LOD	< LOD	< LOD	< LOD	< LOD	16.6156	< LOD	0.289693	< LOD	1.60726	< LOD	< LOD	< LOD	< LOD	< LOD	< LOD
TG(14:0_34:3)	HMDB0042073	< LOD	< LOD	< LOD	< LOD	< LOD	< LOD	< LOD	0.0862071	< LOD	< LOD	< LOD	< LOD	< LOD	< LOD	< LOD	< LOD	< LOD	< LOD	< LOD	< LOD	< LOD	< LOD	< LOD	< LOD	< LOD	< LOD	< LOD	< LOD	< LOD	< LOD	< LOD	< LOD	< LOD	< LOD	< LOD	< LOD	< LOD	2.97926	< LOD	< LOD	< LOD	0.276506	< LOD	< LOD	< LOD	< LOD	< LOD	< LOD
TG(14:0_35:1)	HMDB0042102	< LOD	< LOD	< LOD	< LOD	< LOD	< LOD	< LOD	0.110592	< LOD	< LOD	< LOD	< LOD	< LOD	< LOD	< LOD	< LOD	< LOD	< LOD	< LOD	< LOD	< LOD	< LOD	< LOD	< LOD	< LOD	< LOD	< LOD	< LOD	< LOD	< LOD	< LOD	< LOD	< LOD	< LOD	< LOD	< LOD	< LOD	1.09114	< LOD	< LOD	< LOD	0.150117	< LOD	< LOD	< LOD	< LOD	< LOD	< LOD
TG(14:0_35:2)	HMDB0042108	< LOD	< LOD	< LOD	< LOD	< LOD	< LOD	< LOD	0.140378	< LOD	< LOD	< LOD	< LOD	< LOD	< LOD	< LOD	< LOD	< LOD	< LOD	< LOD	< LOD	< LOD	< LOD	< LOD	< LOD	< LOD	< LOD	< LOD	< LOD	< LOD	< LOD	< LOD	< LOD	< LOD	< LOD	< LOD	< LOD	< LOD	0.699263	< LOD	< LOD	< LOD	< LOD	< LOD	< LOD	< LOD	< LOD	< LOD	< LOD
TG(14:0_36:1)	HMDB0042074	< LOD	< LOD	< LOD	< LOD	< LOD	< LOD	< LOD	0.0268825	< LOD	< LOD	< LOD	< LOD	< LOD	< LOD	< LOD	< LOD	< LOD	< LOD	< LOD	< LOD	< LOD	< LOD	< LOD	< LOD	< LOD	< LOD	< LOD	< LOD	< LOD	< LOD	< LOD	< LOD	< LOD	< LOD	< LOD	< LOD	0.052525	5.30642	0.0376968	0.0853076	0.0875521	0.583476	< LOD	0.0353135	0.0480758	0.0311406	0.0637118	0.0393007
TG(14:0_36:2)	HMDB0042081	< LOD	< LOD	< LOD	< LOD	< LOD	< LOD	< LOD	0.118412	< LOD	< LOD	< LOD	< LOD	< LOD	< LOD	< LOD	< LOD	< LOD	0.119243	0.203696	< LOD	< LOD	< LOD	< LOD	< LOD	< LOD	< LOD	< LOD	< LOD	< LOD	< LOD	< LOD	< LOD	< LOD	< LOD	< LOD	< LOD	0.340371	19.2917	0.340179	0.488062	0.622338	2.14323	0.220345	0.2632	0.319168	0.341614	0.449495	0.27226
TG(14:0_36:3)	HMDB0042133	< LOD	< LOD	< LOD	< LOD	< LOD	< LOD	< LOD	0.0354907	< LOD	< LOD	< LOD	< LOD	< LOD	0.0575197	< LOD	< LOD	< LOD	0.0459262	0.0658006	< LOD	< LOD	< LOD	< LOD	< LOD	< LOD	< LOD	< LOD	< LOD	< LOD	< LOD	< LOD	< LOD	< LOD	< LOD	< LOD	< LOD	0.195828	7.50118	0.287531	0.586257	0.415103	1.00898	0.165674	0.311561	0.172172	0.207262	0.255838	0.159409
TG(14:0_36:4)	HMDB0042082	< LOD	< LOD	< LOD	< LOD	< LOD	< LOD	< LOD	0.032478	< LOD	< LOD	< LOD	< LOD	< LOD	< LOD	< LOD	< LOD	< LOD	< LOD	< LOD	< LOD	< LOD	< LOD	< LOD	< LOD	< LOD	< LOD	< LOD	< LOD	< LOD	< LOD	< LOD	< LOD	< LOD	< LOD	< LOD	< LOD	0.0459118	1.72385	0.0749165	0.21472	0.0959084	0.220782	0.0403319	0.110768	0.0458844	< LOD	0.0588902	< LOD
TG(14:0_38:4)	HMDB0042142	< LOD	< LOD	< LOD	< LOD	< LOD	< LOD	< LOD	0.0323864	< LOD	< LOD	< LOD	< LOD	< LOD	< LOD	< LOD	< LOD	< LOD	< LOD	< LOD	< LOD	< LOD	< LOD	< LOD	< LOD	< LOD	< LOD	< LOD	< LOD	< LOD	< LOD	< LOD	< LOD	< LOD	< LOD	< LOD	< LOD	< LOD	0.269216	< LOD	< LOD	< LOD	< LOD	< LOD	< LOD	< LOD	< LOD	< LOD	< LOD
TG(14:0_38:5)	HMDB0042143	< LOD	< LOD	< LOD	< LOD	< LOD	< LOD	< LOD	0.0276606	< LOD	< LOD	< LOD	< LOD	< LOD	< LOD	< LOD	< LOD	< LOD	< LOD	< LOD	< LOD	< LOD	< LOD	< LOD	< LOD	< LOD	< LOD	< LOD	< LOD	< LOD	< LOD	< LOD	< LOD	< LOD	< LOD	< LOD	< LOD	< LOD	0.201424	< LOD	< LOD	< LOD	< LOD	< LOD	< LOD	< LOD	< LOD	< LOD	< LOD
TG(16:0_28:1)	HMDB0043834	< LOD	< LOD	< LOD	< LOD	< LOD	< LOD	< LOD	0.0982579	< LOD	< LOD	< LOD	< LOD	< LOD	< LOD	< LOD	< LOD	< LOD	< LOD	< LOD	< LOD	< LOD	< LOD	< LOD	< LOD	< LOD	< LOD	< LOD	< LOD	< LOD	< LOD	< LOD	< LOD	< LOD	< LOD	< LOD	< LOD	< LOD	10.5793	< LOD	< LOD	< LOD	0.972558	< LOD	< LOD	< LOD	< LOD	< LOD	< LOD
TG(16:0_28:2)	HMDB0044030	< LOD	< LOD	< LOD	< LOD	< LOD	< LOD	< LOD	0.14495	< LOD	< LOD	< LOD	< LOD	< LOD	< LOD	< LOD	< LOD	< LOD	< LOD	< LOD	< LOD	< LOD	< LOD	< LOD	< LOD	< LOD	< LOD	< LOD	< LOD	< LOD	< LOD	< LOD	< LOD	< LOD	< LOD	< LOD	< LOD	< LOD	2.80711	< LOD	< LOD	< LOD	0.260161	< LOD	< LOD	< LOD	< LOD	< LOD	< LOD
TG(16:0_30:2)	HMDB0044031	< LOD	< LOD	< LOD	< LOD	< LOD	< LOD	< LOD	0.0764275	< LOD	< LOD	< LOD	< LOD	< LOD	< LOD	< LOD	< LOD	< LOD	< LOD	< LOD	< LOD	< LOD	< LOD	< LOD	< LOD	< LOD	< LOD	< LOD	< LOD	< LOD	< LOD	< LOD	< LOD	< LOD	< LOD	< LOD	< LOD	< LOD	5.17696	< LOD	< LOD	< LOD	0.40072	< LOD	< LOD	< LOD	< LOD	< LOD	< LOD
TG(16:0_32:0)	HMDB0005356	0.21054	< LOD	< LOD	< LOD	< LOD	< LOD	< LOD	0.160081	< LOD	< LOD	< LOD	< LOD	< LOD	< LOD	< LOD	< LOD	< LOD	0.183236	< LOD	< LOD	< LOD	< LOD	< LOD	< LOD	< LOD	< LOD	< LOD	< LOD	< LOD	< LOD	0.173224	< LOD	< LOD	< LOD	< LOD	< LOD	0.270737	20.4755	< LOD	< LOD	< LOD	2.31535	< LOD	< LOD	0.228115	< LOD	< LOD	< LOD
TG(16:0_32:1)	HMDB0005359	< LOD	< LOD	< LOD	< LOD	< LOD	< LOD	< LOD	0.179459	< LOD	< LOD	< LOD	< LOD	< LOD	< LOD	< LOD	< LOD	< LOD	0.314932	0.182347	< LOD	< LOD	< LOD	< LOD	< LOD	< LOD	< LOD	< LOD	< LOD	< LOD	< LOD	0.25962	< LOD	< LOD	< LOD	< LOD	< LOD	0.527433	96.1824	0.281231	0.535347	0.288502	7.33694	< LOD	0.223273	0.608413	0.188555	0.521797	0.208207
TG(16:0_32:2)	HMDB0005376	0.392622	< LOD	0.079541	< LOD	< LOD	< LOD	0.147152	0.0445704	< LOD	0.184674	0.165715	0.146858	< LOD	< LOD	< LOD	< LOD	< LOD	0.0840367	0.199415	< LOD	< LOD	< LOD	< LOD	< LOD	< LOD	< LOD	< LOD	< LOD	< LOD	< LOD	0.0730798	< LOD	< LOD	< LOD	< LOD	< LOD	0.165976	29.6297	0.0792418	0.260301	0.0853797	2.29458	0.0618259	0.0668109	0.247322	0.0744079	0.166704	0.0538409
TG(16:0_32:3)	HMDB0043843	< LOD	< LOD	< LOD	< LOD	< LOD	< LOD	< LOD	0.0616817	< LOD	< LOD	< LOD	< LOD	< LOD	< LOD	< LOD	< LOD	< LOD	< LOD	< LOD	< LOD	< LOD	< LOD	< LOD	< LOD	< LOD	< LOD	< LOD	< LOD	< LOD	< LOD	< LOD	< LOD	< LOD	< LOD	< LOD	< LOD	< LOD	3.31877	< LOD	0.0621231	< LOD	0.338774	< LOD	< LOD	< LOD	< LOD	< LOD	< LOD
TG(16:0_33:1)	HMDB0043864	0.0852635	< LOD	< LOD	< LOD	< LOD	< LOD	< LOD	0.0571939	< LOD	< LOD	< LOD	< LOD	< LOD	< LOD	< LOD	< LOD	< LOD	0.0704982	< LOD	< LOD	< LOD	< LOD	< LOD	< LOD	< LOD	< LOD	< LOD	< LOD	< LOD	< LOD	0.0642744	< LOD	< LOD	< LOD	< LOD	< LOD	0.0842859	9.45684	< LOD	0.0837252	< LOD	1.37523	< LOD	< LOD	0.0861108	< LOD	0.0840844	< LOD
TG(16:0_33:2)	HMDB0043870	0.289477	< LOD	< LOD	< LOD	< LOD	< LOD	< LOD	0.115792	< LOD	< LOD	< LOD	< LOD	< LOD	< LOD	< LOD	< LOD	< LOD	< LOD	< LOD	< LOD	< LOD	< LOD	< LOD	< LOD	< LOD	< LOD	< LOD	< LOD	< LOD	< LOD	< LOD	< LOD	< LOD	< LOD	< LOD	< LOD	< LOD	3.04677	< LOD	< LOD	< LOD	0.35395	< LOD	< LOD	< LOD	< LOD	< LOD	< LOD
TG(16:0_34:0)	HMDB0005357	< LOD	< LOD	< LOD	< LOD	< LOD	< LOD	< LOD	0.0352055	< LOD	< LOD	< LOD	< LOD	< LOD	< LOD	< LOD	< LOD	< LOD	0.0866762	< LOD	< LOD	< LOD	< LOD	< LOD	< LOD	< LOD	< LOD	< LOD	0.0488302	< LOD	< LOD	0.0789499	< LOD	< LOD	< LOD	< LOD	< LOD	0.143483	13.5749	0.0518624	0.173562	0.0626233	1.35289	< LOD	0.0828026	0.135831	0.0430664	0.0882604	0.0549246
TG(16:0_34:1)	HMDB0005360	< LOD	< LOD	< LOD	< LOD	< LOD	< LOD	< LOD	0.073626	< LOD	< LOD	< LOD	0.08971	0.0811123	0.210513	< LOD	0.10451	< LOD	0.749386	0.436258	< LOD	0.101534	0.141683	0.0867917	< LOD	0.112617	0.190533	< LOD	0.454102	< LOD	0.120493	0.543983	< LOD	< LOD	0.131246	0.109796	< LOD	1.1925	138.458	0.818669	1.59563	0.746459	11.263	0.35916	0.724182	1.26946	0.563267	1.00008	0.633259
TG(16:0_34:2)	HMDB0005362	< LOD	< LOD	< LOD	< LOD	< LOD	< LOD	< LOD	0.0596383	< LOD	< LOD	< LOD	0.0936249	0.173884	0.267405	0.0653875	0.161269	0.076771	0.706681	0.620226	0.0976482	0.0916454	0.140184	0.112175	< LOD	0.122277	0.257828	0.0709948	0.407324	0.0714816	0.148402	0.361704	< LOD	< LOD	0.121147	0.138604	< LOD	1.21461	116.299	1.06178	2.28113	0.896347	8.83989	0.498721	0.898955	1.33181	1.00608	1.51617	0.694437
TG(16:0_34:3)	HMDB0005379	< LOD	< LOD	< LOD	< LOD	< LOD	< LOD	< LOD	0.0208158	< LOD	< LOD	< LOD	< LOD	0.0227466	0.0466675	< LOD	< LOD	< LOD	0.098287	0.0890035	< LOD	0.0228244	< LOD	< LOD	< LOD	< LOD	0.0312447	< LOD	0.0448124	< LOD	< LOD	0.0479218	< LOD	< LOD	0.0319517	0.0333575	< LOD	0.231701	15.3731	0.17342	0.536924	0.188614	1.31496	0.131319	0.224149	0.239969	0.183755	0.339177	0.128445
TG(16:0_34:4)	HMDB0043846	0.0880557	0.0276948	0.0273218	< LOD	< LOD	< LOD	< LOD	0.0104627	< LOD	0.0230323	0.0575905	< LOD	< LOD	< LOD	< LOD	< LOD	< LOD	0.0162423	< LOD	< LOD	< LOD	< LOD	< LOD	< LOD	< LOD	< LOD	< LOD	< LOD	< LOD	< LOD	< LOD	< LOD	< LOD	< LOD	< LOD	< LOD	0.0146352	2.15455	0.0194232	0.0769515	0.0231217	0.239245	< LOD	0.0322056	0.0421567	0.0510852	0.0256019	< LOD
TG(16:0_35:1)	HMDB0043866	< LOD	< LOD	< LOD	< LOD	< LOD	< LOD	< LOD	0.0257656	< LOD	< LOD	< LOD	< LOD	< LOD	< LOD	< LOD	< LOD	< LOD	0.0425186	0.0267005	< LOD	< LOD	< LOD	< LOD	< LOD	< LOD	< LOD	< LOD	< LOD	< LOD	< LOD	0.0344303	< LOD	< LOD	< LOD	< LOD	< LOD	0.044328	5.00726	0.0328592	0.0635467	0.0293802	0.723282	< LOD	0.0270969	0.063435	< LOD	0.0482488	< LOD
TG(16:0_35:2)	HMDB0043872	< LOD	< LOD	< LOD	< LOD	< LOD	< LOD	< LOD	0.0477207	< LOD	< LOD	< LOD	< LOD	< LOD	< LOD	< LOD	< LOD	< LOD	0.0531412	< LOD	< LOD	< LOD	< LOD	< LOD	< LOD	< LOD	< LOD	< LOD	< LOD	< LOD	< LOD	< LOD	< LOD	< LOD	< LOD	< LOD	< LOD	0.0715883	4.98466	0.0492019	0.142087	0.053969	0.848271	< LOD	< LOD	0.0965974	0.0628821	0.0793491	0.0492752
TG(16:0_35:3)	HMDB0043867	< LOD	< LOD	< LOD	< LOD	< LOD	< LOD	< LOD	0.0430857	< LOD	< LOD	< LOD	< LOD	< LOD	< LOD	< LOD	< LOD	< LOD	< LOD	< LOD	< LOD	< LOD	< LOD	< LOD	< LOD	< LOD	< LOD	< LOD	< LOD	< LOD	< LOD	< LOD	< LOD	< LOD	< LOD	< LOD	< LOD	< LOD	0.74916	< LOD	0.055144	< LOD	0.159306	< LOD	< LOD	< LOD	< LOD	< LOD	< LOD
TG(16:0_36:2)	HMDB0005369	< LOD	< LOD	< LOD	0.0422107	0.0593836	< LOD	< LOD	0.0254692	< LOD	< LOD	< LOD	0.240617	0.664652	0.736338	0.240462	0.381108	0.327887	1.31604	1.60356	0.286979	0.297079	0.667736	0.50292	0.0331698	0.198671	0.852001	0.27392	1.26845	0.372923	0.626165	0.624917	0.286817	0.0381533	0.48754	0.410835	0.0336953	2.91089	167.542	3.49982	5.53615	4.43875	14.8344	1.73657	2.35262	2.44187	3.74543	3.35244	2.84377
TG(16:0_36:3)	HMDB0005384	< LOD	< LOD	< LOD	< LOD	< LOD	< LOD	< LOD	0.124708	< LOD	< LOD	< LOD	0.176092	0.378405	0.708514	0.272445	0.173075	0.24147	0.628938	0.921086	0.227331	0.286962	0.512887	0.278754	< LOD	0.159567	0.453938	0.175313	0.442413	0.212013	0.255613	0.311467	0.157262	< LOD	0.473138	0.294249	< LOD	1.96991	61.0168	3.26557	5.76555	2.92898	7.35428	1.43069	2.44111	1.88561	2.39333	2.27129	1.65636
TG(16:0_36:4)	HMDB0005363	< LOD	< LOD	< LOD	< LOD	< LOD	< LOD	< LOD	0.113289	< LOD	< LOD	< LOD	< LOD	< LOD	0.23881	0.131776	< LOD	< LOD	0.154118	0.165545	< LOD	< LOD	< LOD	< LOD	< LOD	< LOD	< LOD	< LOD	< LOD	< LOD	< LOD	< LOD	< LOD	< LOD	< LOD	< LOD	< LOD	0.483754	13.4039	0.880719	2.05948	0.723187	1.67049	0.344699	0.983152	0.541852	0.52253	0.478838	0.370093
TG(16:0_36:5)	HMDB0005380	< LOD	< LOD	< LOD	< LOD	< LOD	< LOD	< LOD	0.0663672	< LOD	< LOD	< LOD	< LOD	< LOD	< LOD	< LOD	< LOD	< LOD	< LOD	< LOD	< LOD	< LOD	< LOD	< LOD	< LOD	< LOD	< LOD	< LOD	< LOD	< LOD	< LOD	< LOD	< LOD	< LOD	< LOD	< LOD	< LOD	< LOD	2.13914	0.0799016	0.328009	0.0964329	0.317651	< LOD	0.127381	< LOD	< LOD	< LOD	< LOD
TG(16:0_36:6)	HMDB0043855	< LOD	< LOD	< LOD	< LOD	< LOD	< LOD	< LOD	0.0347822	< LOD	< LOD	< LOD	< LOD	< LOD	< LOD	< LOD	< LOD	< LOD	< LOD	< LOD	< LOD	< LOD	< LOD	< LOD	< LOD	< LOD	< LOD	< LOD	< LOD	< LOD	< LOD	< LOD	< LOD	< LOD	< LOD	< LOD	< LOD	< LOD	0.220261	< LOD	< LOD	< LOD	0.0454465	< LOD	< LOD	< LOD	< LOD	< LOD	< LOD
TG(16:0_37:3)	N/A	< LOD	< LOD	< LOD	< LOD	< LOD	< LOD	< LOD	0.0577494	< LOD	< LOD	< LOD	< LOD	< LOD	< LOD	< LOD	< LOD	< LOD	< LOD	0.0682047	< LOD	< LOD	< LOD	< LOD	< LOD	< LOD	< LOD	< LOD	< LOD	< LOD	< LOD	< LOD	< LOD	< LOD	< LOD	< LOD	< LOD	< LOD	0.315614	< LOD	< LOD	< LOD	0.0600705	< LOD	< LOD	< LOD	< LOD	< LOD	< LOD
TG(16:0_38:1)	HMDB0005368	< LOD	< LOD	< LOD	< LOD	< LOD	< LOD	< LOD	0.0741339	< LOD	< LOD	< LOD	< LOD	< LOD	< LOD	< LOD	< LOD	< LOD	< LOD	< LOD	< LOD	< LOD	< LOD	< LOD	< LOD	< LOD	< LOD	< LOD	< LOD	< LOD	< LOD	< LOD	< LOD	< LOD	< LOD	< LOD	< LOD	< LOD	0.239566	< LOD	< LOD	< LOD	< LOD	< LOD	< LOD	< LOD	< LOD	< LOD	< LOD
TG(16:0_38:2)	HMDB0005383	< LOD	< LOD	< LOD	< LOD	< LOD	< LOD	< LOD	0.163066	< LOD	< LOD	< LOD	< LOD	< LOD	< LOD	< LOD	< LOD	< LOD	< LOD	< LOD	< LOD	< LOD	< LOD	< LOD	< LOD	< LOD	< LOD	< LOD	< LOD	< LOD	< LOD	< LOD	< LOD	< LOD	< LOD	< LOD	< LOD	< LOD	1.16831	< LOD	< LOD	< LOD	< LOD	< LOD	< LOD	< LOD	< LOD	< LOD	< LOD
TG(16:0_38:3)	HMDB0005389	< LOD	< LOD	< LOD	< LOD	< LOD	< LOD	< LOD	0.010944	< LOD	< LOD	< LOD	< LOD	< LOD	0.014514	< LOD	< LOD	< LOD	< LOD	< LOD	< LOD	0.0119235	< LOD	< LOD	< LOD	< LOD	0.0133599	< LOD	< LOD	< LOD	< LOD	< LOD	< LOD	< LOD	< LOD	< LOD	< LOD	0.0278448	1.60704	0.0524346	0.069238	0.0563932	0.132596	0.0247593	0.0411385	0.0191979	0.03627	0.0328483	0.018658
TG(16:0_38:4)	HMDB0005370	< LOD	< LOD	< LOD	< LOD	< LOD	< LOD	< LOD	0.0400303	< LOD	< LOD	< LOD	< LOD	< LOD	< LOD	< LOD	< LOD	< LOD	< LOD	< LOD	< LOD	< LOD	< LOD	< LOD	< LOD	< LOD	< LOD	< LOD	< LOD	< LOD	< LOD	< LOD	< LOD	< LOD	< LOD	< LOD	< LOD	0.0443626	1.8628	0.0794176	0.119374	0.0734215	0.227108	0.0485786	0.0587359	< LOD	0.0457415	0.0759532	0.0594853
TG(16:0_38:5)	HMDB0005385	< LOD	< LOD	< LOD	< LOD	< LOD	< LOD	< LOD	0.0393589	< LOD	< LOD	< LOD	< LOD	< LOD	< LOD	< LOD	< LOD	< LOD	< LOD	< LOD	< LOD	< LOD	< LOD	< LOD	< LOD	< LOD	< LOD	< LOD	< LOD	< LOD	< LOD	< LOD	< LOD	< LOD	< LOD	< LOD	< LOD	< LOD	1.96935	0.0749079	0.138145	0.0767056	0.243624	0.0453634	0.0521009	0.0543095	< LOD	0.0514609	0.0535307
TG(16:0_38:6)	HMDB0005391	< LOD	< LOD	< LOD	< LOD	< LOD	< LOD	< LOD	0.0765524	< LOD	< LOD	< LOD	< LOD	< LOD	< LOD	< LOD	< LOD	< LOD	< LOD	< LOD	< LOD	< LOD	< LOD	< LOD	< LOD	< LOD	< LOD	< LOD	< LOD	< LOD	< LOD	< LOD	< LOD	< LOD	< LOD	< LOD	< LOD	< LOD	0.893109	< LOD	< LOD	< LOD	0.160023	< LOD	< LOD	< LOD	< LOD	< LOD	< LOD
TG(16:0_38:7)	HMDB0044079	< LOD	< LOD	< LOD	< LOD	< LOD	< LOD	< LOD	0.0196158	< LOD	< LOD	< LOD	< LOD	< LOD	< LOD	< LOD	< LOD	< LOD	< LOD	< LOD	< LOD	< LOD	< LOD	< LOD	< LOD	< LOD	< LOD	< LOD	< LOD	< LOD	< LOD	< LOD	< LOD	< LOD	< LOD	< LOD	< LOD	< LOD	0.125228	< LOD	< LOD	< LOD	0.0263973	< LOD	< LOD	< LOD	< LOD	< LOD	< LOD
TG(16:0_40:6)	HMDB0043939	< LOD	< LOD	< LOD	< LOD	< LOD	< LOD	< LOD	0.0456481	< LOD	< LOD	< LOD	< LOD	< LOD	< LOD	< LOD	< LOD	< LOD	< LOD	< LOD	< LOD	< LOD	< LOD	< LOD	< LOD	< LOD	< LOD	< LOD	< LOD	< LOD	< LOD	< LOD	< LOD	< LOD	< LOD	< LOD	< LOD	< LOD	0.612915	< LOD	0.0462624	< LOD	0.110232	< LOD	< LOD	< LOD	< LOD	< LOD	< LOD
TG(16:0_40:7)	HMDB0044107	< LOD	< LOD	< LOD	< LOD	< LOD	< LOD	< LOD	0.0410398	< LOD	< LOD	< LOD	< LOD	< LOD	< LOD	< LOD	< LOD	< LOD	< LOD	< LOD	< LOD	< LOD	< LOD	< LOD	< LOD	< LOD	< LOD	< LOD	< LOD	< LOD	< LOD	< LOD	< LOD	< LOD	< LOD	< LOD	< LOD	< LOD	0.392188	< LOD	< LOD	< LOD	0.0785412	< LOD	< LOD	< LOD	< LOD	< LOD	< LOD
TG(16:0_40:8)	HMDB0005392	< LOD	< LOD	< LOD	< LOD	< LOD	< LOD	< LOD	0.0576696	< LOD	< LOD	< LOD	< LOD	< LOD	< LOD	< LOD	< LOD	< LOD	< LOD	< LOD	< LOD	< LOD	< LOD	< LOD	< LOD	< LOD	< LOD	< LOD	< LOD	< LOD	< LOD	< LOD	< LOD	< LOD	< LOD	< LOD	< LOD	< LOD	< LOD	< LOD	< LOD	< LOD	< LOD	< LOD	< LOD	< LOD	< LOD	< LOD	< LOD
TG(16:1_28:0)	N/A	< LOD	< LOD	< LOD	< LOD	< LOD	< LOD	< LOD	0.0404818	< LOD	< LOD	< LOD	< LOD	< LOD	< LOD	< LOD	< LOD	< LOD	< LOD	< LOD	< LOD	< LOD	< LOD	< LOD	< LOD	< LOD	< LOD	< LOD	< LOD	< LOD	< LOD	< LOD	< LOD	< LOD	< LOD	< LOD	< LOD	< LOD	2.82188	< LOD	< LOD	< LOD	0.213112	< LOD	< LOD	< LOD	< LOD	< LOD	< LOD
TG(16:1_30:1)	HMDB0010419	< LOD	< LOD	< LOD	< LOD	< LOD	< LOD	< LOD	0.0258406	< LOD	< LOD	< LOD	< LOD	< LOD	< LOD	< LOD	< LOD	< LOD	< LOD	< LOD	< LOD	< LOD	< LOD	< LOD	< LOD	< LOD	< LOD	< LOD	< LOD	< LOD	< LOD	< LOD	< LOD	< LOD	< LOD	< LOD	< LOD	< LOD	5.51911	< LOD	< LOD	< LOD	0.336437	< LOD	< LOD	< LOD	< LOD	< LOD	< LOD
TG(16:1_32:0)	HMDB0048434	< LOD	< LOD	< LOD	< LOD	< LOD	< LOD	< LOD	0.10004	< LOD	< LOD	< LOD	< LOD	< LOD	< LOD	< LOD	< LOD	< LOD	< LOD	< LOD	< LOD	< LOD	< LOD	< LOD	< LOD	< LOD	< LOD	< LOD	< LOD	< LOD	< LOD	< LOD	< LOD	< LOD	< LOD	< LOD	< LOD	0.127634	24.7221	< LOD	< LOD	< LOD	1.394	< LOD	< LOD	0.104289	< LOD	< LOD	< LOD
TG(16:1_32:1)	HMDB0010420	< LOD	< LOD	< LOD	< LOD	< LOD	< LOD	< LOD	0.191476	< LOD	< LOD	< LOD	< LOD	< LOD	< LOD	< LOD	< LOD	< LOD	< LOD	< LOD	< LOD	< LOD	< LOD	< LOD	< LOD	< LOD	< LOD	< LOD	< LOD	< LOD	< LOD	< LOD	< LOD	< LOD	< LOD	< LOD	< LOD	< LOD	25.8706	< LOD	< LOD	< LOD	1.31909	< LOD	< LOD	< LOD	< LOD	0.278038	< LOD
TG(16:1_32:2)	HMDB0010422	0.260434	< LOD	0.098369	< LOD	< LOD	< LOD	0.0571223	0.0469041	< LOD	< LOD	0.138197	0.145733	< LOD	< LOD	< LOD	< LOD	< LOD	< LOD	0.172516	< LOD	< LOD	< LOD	< LOD	< LOD	< LOD	< LOD	< LOD	< LOD	< LOD	< LOD	< LOD	< LOD	< LOD	< LOD	< LOD	< LOD	< LOD	4.06687	< LOD	0.0490496	< LOD	0.273142	< LOD	< LOD	< LOD	0.0524381	< LOD	< LOD
TG(16:1_33:1)	HMDB0048436	< LOD	< LOD	< LOD	< LOD	< LOD	< LOD	< LOD	0.0206097	< LOD	< LOD	< LOD	< LOD	< LOD	< LOD	< LOD	< LOD	< LOD	0.0292121	< LOD	< LOD	< LOD	< LOD	< LOD	< LOD	< LOD	< LOD	< LOD	< LOD	< LOD	< LOD	< LOD	< LOD	< LOD	< LOD	< LOD	< LOD	< LOD	2.25118	< LOD	0.0264331	< LOD	0.264082	< LOD	< LOD	0.0319114	< LOD	0.0393586	< LOD
TG(16:1_34:0)	HMDB0048478	< LOD	< LOD	< LOD	< LOD	< LOD	< LOD	< LOD	0.0161221	< LOD	< LOD	< LOD	< LOD	< LOD	< LOD	< LOD	< LOD	< LOD	0.0320023	< LOD	< LOD	< LOD	< LOD	< LOD	< LOD	< LOD	< LOD	< LOD	0.0226771	< LOD	< LOD	0.0287156	< LOD	< LOD	< LOD	< LOD	< LOD	0.0663768	9.74919	0.0323899	0.0706415	0.0453836	0.69553	0.0195841	0.0225242	0.0645808	0.0484747	0.106977	0.0333836
TG(16:1_34:1)	HMDB0010423	< LOD	< LOD	< LOD	< LOD	< LOD	< LOD	< LOD	0.0399198	< LOD	< LOD	< LOD	< LOD	0.0719405	0.0848237	< LOD	0.102455	< LOD	0.346012	0.31881	< LOD	< LOD	0.0458073	0.0597049	< LOD	0.0447815	0.130292	< LOD	0.203104	< LOD	0.0898234	0.158153	< LOD	< LOD	0.0581998	0.0597311	< LOD	0.56002	63.4395	0.397661	0.80046	0.429648	3.93585	0.251028	0.250089	0.46074	0.546576	0.842667	0.379274
TG(16:1_34:2)	HMDB0048464	< LOD	< LOD	< LOD	< LOD	< LOD	< LOD	< LOD	0.0484	< LOD	< LOD	< LOD	< LOD	0.0619158	0.0711869	< LOD	< LOD	< LOD	0.105466	0.194073	< LOD	< LOD	< LOD	< LOD	< LOD	< LOD	0.0491976	< LOD	0.0845576	< LOD	< LOD	< LOD	< LOD	< LOD	< LOD	0.050114	< LOD	0.262143	18.6196	0.265947	0.568493	0.249024	1.27794	0.145462	0.207681	0.255954	0.335031	0.478278	0.22686
TG(16:1_34:3)	HMDB0048465	< LOD	< LOD	< LOD	< LOD	< LOD	< LOD	< LOD	0.0730935	< LOD	< LOD	< LOD	< LOD	< LOD	< LOD	< LOD	< LOD	< LOD	< LOD	< LOD	< LOD	< LOD	< LOD	< LOD	< LOD	< LOD	< LOD	< LOD	< LOD	< LOD	< LOD	< LOD	< LOD	< LOD	< LOD	< LOD	< LOD	< LOD	2.39861	< LOD	0.132059	< LOD	0.193466	< LOD	< LOD	< LOD	< LOD	0.095039	< LOD
TG(16:1_36:1)	HMDB0048460	< LOD	< LOD	< LOD	< LOD	< LOD	< LOD	< LOD	0.126191	< LOD	< LOD	< LOD	< LOD	< LOD	< LOD	< LOD	< LOD	< LOD	< LOD	< LOD	< LOD	< LOD	< LOD	< LOD	< LOD	< LOD	< LOD	< LOD	< LOD	< LOD	< LOD	< LOD	< LOD	< LOD	< LOD	< LOD	< LOD	< LOD	5.4233	< LOD	0.153501	0.140759	0.405266	< LOD	< LOD	< LOD	< LOD	< LOD	< LOD
TG(16:1_36:2)	HMDB0005425	< LOD	< LOD	< LOD	< LOD	< LOD	< LOD	< LOD	0.153729	< LOD	< LOD	< LOD	< LOD	0.159005	< LOD	< LOD	< LOD	< LOD	< LOD	0.281371	< LOD	< LOD	< LOD	< LOD	< LOD	< LOD	0.193972	< LOD	0.178434	< LOD	< LOD	< LOD	< LOD	< LOD	< LOD	< LOD	< LOD	0.474599	17.9064	0.50388	0.93305	1.01288	1.47768	0.370207	0.440888	0.327454	0.882231	0.789214	0.625062
TG(16:1_36:3)	HMDB0048487	< LOD	< LOD	< LOD	< LOD	< LOD	< LOD	< LOD	0.0867456	< LOD	< LOD	< LOD	< LOD	< LOD	< LOD	< LOD	< LOD	< LOD	< LOD	0.157824	< LOD	< LOD	< LOD	< LOD	< LOD	< LOD	< LOD	< LOD	< LOD	< LOD	< LOD	< LOD	< LOD	< LOD	< LOD	< LOD	< LOD	0.2862	5.584	0.393619	0.902058	0.631563	0.623151	0.259823	0.450558	0.217752	0.527543	0.388872	0.310739
TG(16:1_36:4)	HMDB0048495	< LOD	< LOD	< LOD	< LOD	< LOD	< LOD	< LOD	0.0178372	< LOD	< LOD	< LOD	< LOD	< LOD	0.026178	0.0227725	< LOD	< LOD	< LOD	< LOD	< LOD	< LOD	< LOD	< LOD	< LOD	< LOD	< LOD	< LOD	< LOD	< LOD	< LOD	< LOD	< LOD	< LOD	< LOD	< LOD	< LOD	0.0755515	0.960926	0.0875336	0.363275	0.116486	0.156183	0.0779963	0.139854	0.0596382	0.0821701	0.0735329	0.072325
TG(16:1_36:5)	HMDB0048627	< LOD	< LOD	< LOD	< LOD	< LOD	< LOD	< LOD	0.0560324	< LOD	< LOD	< LOD	< LOD	< LOD	< LOD	< LOD	< LOD	< LOD	< LOD	< LOD	< LOD	< LOD	< LOD	< LOD	< LOD	< LOD	< LOD	< LOD	< LOD	< LOD	< LOD	< LOD	< LOD	< LOD	< LOD	< LOD	< LOD	< LOD	0.186625	< LOD	0.065353	< LOD	< LOD	< LOD	< LOD	< LOD	< LOD	< LOD	< LOD
TG(16:1_38:3)	HMDB0048620	< LOD	< LOD	< LOD	< LOD	< LOD	< LOD	< LOD	0.0316389	< LOD	< LOD	< LOD	< LOD	< LOD	< LOD	< LOD	< LOD	< LOD	< LOD	< LOD	< LOD	< LOD	< LOD	< LOD	< LOD	< LOD	< LOD	< LOD	< LOD	< LOD	< LOD	< LOD	< LOD	< LOD	< LOD	< LOD	< LOD	< LOD	0.0733859	< LOD	< LOD	< LOD	< LOD	< LOD	< LOD	< LOD	< LOD	< LOD	< LOD
TG(16:1_38:4)	HMDB0048615	< LOD	< LOD	< LOD	< LOD	< LOD	< LOD	< LOD	0.06345	< LOD	< LOD	< LOD	< LOD	< LOD	< LOD	< LOD	< LOD	< LOD	< LOD	< LOD	< LOD	< LOD	< LOD	< LOD	< LOD	< LOD	< LOD	< LOD	< LOD	< LOD	< LOD	< LOD	< LOD	< LOD	< LOD	< LOD	< LOD	< LOD	0.154894	< LOD	< LOD	< LOD	< LOD	< LOD	< LOD	< LOD	< LOD	< LOD	< LOD
TG(16:1_38:5)	HMDB0048622	< LOD	< LOD	< LOD	< LOD	< LOD	< LOD	< LOD	0.0223685	< LOD	< LOD	< LOD	< LOD	< LOD	< LOD	< LOD	< LOD	< LOD	< LOD	< LOD	< LOD	< LOD	< LOD	< LOD	< LOD	< LOD	< LOD	< LOD	< LOD	< LOD	< LOD	< LOD	< LOD	< LOD	< LOD	< LOD	< LOD	< LOD	0.187812	< LOD	< LOD	< LOD	0.0223718	< LOD	< LOD	< LOD	< LOD	< LOD	< LOD
TG(17:0_32:1)	N/A	< LOD	< LOD	< LOD	< LOD	< LOD	< LOD	< LOD	0.042712	< LOD	< LOD	< LOD	< LOD	< LOD	< LOD	< LOD	< LOD	< LOD	< LOD	< LOD	< LOD	< LOD	< LOD	< LOD	< LOD	< LOD	< LOD	< LOD	< LOD	< LOD	< LOD	< LOD	< LOD	< LOD	< LOD	< LOD	< LOD	< LOD	1.9646	< LOD	< LOD	< LOD	0.290193	< LOD	< LOD	< LOD	< LOD	< LOD	< LOD
TG(17:0_34:1)	N/A	< LOD	< LOD	< LOD	< LOD	< LOD	< LOD	< LOD	0.0227917	< LOD	< LOD	< LOD	< LOD	< LOD	< LOD	< LOD	< LOD	< LOD	< LOD	< LOD	< LOD	< LOD	< LOD	< LOD	< LOD	< LOD	< LOD	< LOD	< LOD	< LOD	< LOD	< LOD	< LOD	< LOD	< LOD	< LOD	< LOD	0.0484906	3.01524	0.0263297	0.0479336	0.0251646	0.544932	< LOD	< LOD	0.0431341	< LOD	0.0382431	< LOD
TG(17:0_34:2)	N/A	< LOD	< LOD	< LOD	< LOD	< LOD	< LOD	< LOD	0.0722775	< LOD	< LOD	< LOD	< LOD	< LOD	< LOD	< LOD	< LOD	< LOD	< LOD	< LOD	< LOD	< LOD	< LOD	< LOD	< LOD	< LOD	< LOD	< LOD	< LOD	< LOD	< LOD	< LOD	< LOD	< LOD	< LOD	< LOD	< LOD	< LOD	1.83273	< LOD	< LOD	< LOD	0.271262	< LOD	< LOD	< LOD	< LOD	< LOD	< LOD
TG(17:0_34:3)	N/A	< LOD	< LOD	< LOD	< LOD	< LOD	< LOD	< LOD	0.0689576	< LOD	< LOD	< LOD	< LOD	< LOD	< LOD	< LOD	< LOD	< LOD	< LOD	< LOD	< LOD	< LOD	< LOD	< LOD	< LOD	< LOD	< LOD	< LOD	< LOD	< LOD	< LOD	< LOD	< LOD	< LOD	< LOD	< LOD	< LOD	< LOD	0.184691	< LOD	< LOD	< LOD	< LOD	< LOD	< LOD	< LOD	< LOD	< LOD	< LOD
TG(17:0_36:3)	N/A	< LOD	< LOD	< LOD	< LOD	< LOD	< LOD	< LOD	0.0449982	< LOD	< LOD	< LOD	< LOD	< LOD	< LOD	< LOD	< LOD	< LOD	< LOD	< LOD	< LOD	< LOD	< LOD	< LOD	< LOD	< LOD	< LOD	< LOD	< LOD	< LOD	< LOD	< LOD	< LOD	< LOD	< LOD	< LOD	< LOD	< LOD	1.03997	0.0506363	0.116018	0.0621748	0.18349	< LOD	< LOD	< LOD	< LOD	0.0516519	< LOD
TG(17:0_36:4)	N/A	< LOD	< LOD	< LOD	< LOD	< LOD	< LOD	< LOD	0.0239607	< LOD	< LOD	< LOD	< LOD	< LOD	< LOD	< LOD	< LOD	< LOD	< LOD	< LOD	< LOD	< LOD	< LOD	< LOD	< LOD	< LOD	< LOD	< LOD	< LOD	< LOD	< LOD	< LOD	< LOD	< LOD	< LOD	< LOD	< LOD	< LOD	0.181891	< LOD	0.0330923	< LOD	0.0420499	< LOD	< LOD	< LOD	< LOD	< LOD	< LOD
TG(17:1_32:1)	N/A	< LOD	< LOD	< LOD	< LOD	< LOD	< LOD	< LOD	0.0531662	< LOD	< LOD	< LOD	< LOD	< LOD	< LOD	< LOD	< LOD	< LOD	< LOD	< LOD	< LOD	< LOD	< LOD	< LOD	< LOD	< LOD	< LOD	< LOD	< LOD	< LOD	< LOD	< LOD	< LOD	< LOD	< LOD	< LOD	< LOD	< LOD	1.45477	< LOD	< LOD	< LOD	0.205609	< LOD	< LOD	< LOD	< LOD	< LOD	< LOD
TG(17:1_34:1)	N/A	< LOD	< LOD	< LOD	< LOD	< LOD	< LOD	< LOD	0.0182963	< LOD	< LOD	< LOD	< LOD	< LOD	< LOD	< LOD	< LOD	< LOD	0.0369877	0.0210599	< LOD	< LOD	< LOD	< LOD	< LOD	< LOD	< LOD	< LOD	< LOD	< LOD	< LOD	0.0212727	< LOD	< LOD	< LOD	< LOD	< LOD	0.0438372	3.76381	0.0474125	0.0855239	0.0382023	0.518699	< LOD	0.0274866	0.0522592	0.0536826	0.0549684	0.0317595
TG(17:1_34:2)	N/A	< LOD	< LOD	< LOD	< LOD	< LOD	< LOD	< LOD	0.083743	< LOD	< LOD	< LOD	< LOD	< LOD	< LOD	< LOD	< LOD	< LOD	< LOD	< LOD	< LOD	< LOD	< LOD	< LOD	< LOD	< LOD	< LOD	< LOD	< LOD	< LOD	< LOD	< LOD	< LOD	< LOD	< LOD	< LOD	< LOD	< LOD	1.18993	< LOD	< LOD	< LOD	0.197863	< LOD	< LOD	< LOD	< LOD	< LOD	< LOD
TG(17:1_34:3)	N/A	< LOD	< LOD	< LOD	< LOD	< LOD	< LOD	< LOD	0.093939	< LOD	< LOD	< LOD	< LOD	< LOD	< LOD	< LOD	< LOD	< LOD	< LOD	< LOD	< LOD	< LOD	< LOD	< LOD	< LOD	< LOD	< LOD	< LOD	< LOD	< LOD	< LOD	< LOD	< LOD	< LOD	< LOD	< LOD	< LOD	< LOD	0.112066	< LOD	< LOD	< LOD	< LOD	< LOD	< LOD	< LOD	< LOD	< LOD	< LOD
TG(17:1_36:3)	N/A	< LOD	< LOD	< LOD	< LOD	< LOD	< LOD	< LOD	0.0348417	< LOD	< LOD	< LOD	< LOD	< LOD	< LOD	< LOD	< LOD	< LOD	< LOD	< LOD	< LOD	< LOD	< LOD	< LOD	< LOD	< LOD	< LOD	< LOD	< LOD	< LOD	< LOD	< LOD	< LOD	< LOD	< LOD	< LOD	< LOD	< LOD	0.292789	< LOD	0.0460846	0.0363952	0.0558802	< LOD	< LOD	< LOD	< LOD	< LOD	< LOD
TG(17:1_36:4)	N/A	< LOD	< LOD	< LOD	< LOD	< LOD	< LOD	< LOD	0.0474526	< LOD	< LOD	< LOD	< LOD	< LOD	< LOD	< LOD	< LOD	< LOD	< LOD	< LOD	< LOD	< LOD	< LOD	< LOD	< LOD	< LOD	< LOD	< LOD	< LOD	< LOD	< LOD	< LOD	< LOD	< LOD	< LOD	< LOD	< LOD	< LOD	0.073467	< LOD	< LOD	< LOD	< LOD	< LOD	< LOD	< LOD	< LOD	< LOD	< LOD
TG(18:0_30:0)	HMDB0107858	< LOD	< LOD	< LOD	< LOD	< LOD	< LOD	< LOD	0.0595106	< LOD	< LOD	< LOD	< LOD	< LOD	< LOD	< LOD	< LOD	< LOD	< LOD	< LOD	< LOD	< LOD	< LOD	< LOD	< LOD	< LOD	< LOD	< LOD	< LOD	< LOD	< LOD	< LOD	< LOD	< LOD	< LOD	< LOD	< LOD	< LOD	3.79058	< LOD	< LOD	< LOD	0.405626	< LOD	< LOD	< LOD	< LOD	< LOD	< LOD
TG(18:0_30:1)	HMDB0010426	< LOD	< LOD	< LOD	< LOD	< LOD	< LOD	< LOD	0.0623153	< LOD	< LOD	< LOD	< LOD	< LOD	< LOD	< LOD	< LOD	< LOD	< LOD	< LOD	< LOD	< LOD	< LOD	< LOD	< LOD	< LOD	< LOD	< LOD	< LOD	< LOD	< LOD	< LOD	< LOD	< LOD	< LOD	< LOD	< LOD	< LOD	3.79331	< LOD	< LOD	< LOD	0.325045	< LOD	< LOD	< LOD	< LOD	< LOD	< LOD
TG(18:0_32:0)	HMDB0010427	< LOD	< LOD	< LOD	< LOD	< LOD	< LOD	< LOD	0.0617693	< LOD	< LOD	< LOD	< LOD	< LOD	< LOD	< LOD	< LOD	< LOD	< LOD	< LOD	< LOD	< LOD	< LOD	< LOD	< LOD	< LOD	< LOD	< LOD	< LOD	< LOD	< LOD	< LOD	< LOD	< LOD	< LOD	< LOD	< LOD	< LOD	3.79826	< LOD	< LOD	< LOD	0.574414	< LOD	< LOD	< LOD	< LOD	< LOD	< LOD
TG(18:0_32:1)	HMDB0010428	0.0348793	< LOD	< LOD	< LOD	< LOD	< LOD	< LOD	0.0293814	< LOD	< LOD	< LOD	< LOD	< LOD	< LOD	< LOD	< LOD	< LOD	0.0522542	0.0492065	< LOD	< LOD	< LOD	< LOD	< LOD	< LOD	< LOD	< LOD	0.0374981	< LOD	< LOD	< LOD	< LOD	< LOD	< LOD	< LOD	< LOD	0.089934	11.2627	0.0386628	0.0875557	0.0719833	0.902695	< LOD	0.0560268	0.0822088	0.0328566	0.0667223	0.0335882
TG(18:0_32:2)	HMDB0010430	0.109272	0.0532388	0.0383255	< LOD	0.0194561	< LOD	0.115724	0.0127326	0.0421	0.0486085	0.119137	0.105618	< LOD	< LOD	< LOD	< LOD	< LOD	0.0174239	0.0884008	< LOD	< LOD	< LOD	< LOD	< LOD	< LOD	< LOD	< LOD	< LOD	< LOD	< LOD	< LOD	< LOD	< LOD	< LOD	< LOD	< LOD	< LOD	2.22049	< LOD	0.0334275	< LOD	0.23074	< LOD	0.0211751	0.0147706	< LOD	< LOD	< LOD
TG(18:0_34:2)	HMDB0044682	< LOD	< LOD	< LOD	< LOD	< LOD	< LOD	< LOD	0.166451	< LOD	< LOD	< LOD	< LOD	< LOD	< LOD	< LOD	< LOD	< LOD	< LOD	< LOD	< LOD	< LOD	< LOD	< LOD	< LOD	< LOD	< LOD	< LOD	< LOD	< LOD	< LOD	< LOD	< LOD	< LOD	< LOD	< LOD	< LOD	0.174066	10.6419	0.169744	0.285425	0.203003	1.07009	< LOD	0.212838	< LOD	< LOD	0.172432	< LOD
TG(18:0_34:3)	HMDB0010432	< LOD	< LOD	< LOD	< LOD	< LOD	< LOD	< LOD	0.044807	< LOD	< LOD	< LOD	< LOD	< LOD	< LOD	< LOD	< LOD	< LOD	< LOD	< LOD	< LOD	< LOD	< LOD	< LOD	< LOD	< LOD	< LOD	< LOD	< LOD	< LOD	< LOD	< LOD	< LOD	< LOD	< LOD	< LOD	< LOD	< LOD	1.44775	< LOD	0.0738461	< LOD	0.176734	< LOD	0.0510066	< LOD	< LOD	< LOD	< LOD
TG(18:0_36:1)	HMDB0005395	< LOD	< LOD	< LOD	< LOD	< LOD	< LOD	< LOD	0.0451614	< LOD	< LOD	< LOD	< LOD	< LOD	< LOD	< LOD	< LOD	< LOD	0.0546011	< LOD	< LOD	< LOD	< LOD	< LOD	< LOD	< LOD	< LOD	< LOD	0.056092	< LOD	< LOD	< LOD	< LOD	< LOD	< LOD	< LOD	< LOD	0.0618968	3.80432	< LOD	0.0571465	0.0734943	0.369026	< LOD	0.077833	< LOD	< LOD	< LOD	< LOD
TG(18:0_36:2)	HMDB0005397	0.261314	0.0945841	0.111756	< LOD	< LOD	< LOD	< LOD	0.057966	< LOD	< LOD	< LOD	< LOD	< LOD	< LOD	< LOD	< LOD	< LOD	0.0591151	< LOD	< LOD	< LOD	< LOD	< LOD	< LOD	< LOD	< LOD	< LOD	0.10932	< LOD	< LOD	< LOD	< LOD	< LOD	< LOD	< LOD	< LOD	0.189615	10.0188	0.150476	0.332391	0.288997	0.960566	0.0858178	0.289806	0.172971	0.207422	0.148767	0.168261
TG(18:0_36:3)	HMDB0005405	< LOD	< LOD	< LOD	< LOD	< LOD	< LOD	< LOD	0.0799149	< LOD	< LOD	< LOD	< LOD	< LOD	< LOD	< LOD	< LOD	< LOD	< LOD	< LOD	< LOD	< LOD	< LOD	< LOD	< LOD	< LOD	< LOD	< LOD	< LOD	< LOD	< LOD	< LOD	< LOD	< LOD	< LOD	< LOD	< LOD	0.149906	4.5512	0.180202	0.361277	0.266105	0.585223	0.0930708	0.333229	0.119467	0.111278	0.141725	0.117446
TG(18:0_36:4)	HMDB0005411	< LOD	< LOD	< LOD	< LOD	< LOD	< LOD	< LOD	0.0586099	< LOD	< LOD	< LOD	< LOD	< LOD	< LOD	< LOD	< LOD	< LOD	< LOD	< LOD	< LOD	< LOD	< LOD	< LOD	< LOD	< LOD	< LOD	< LOD	< LOD	< LOD	< LOD	< LOD	< LOD	< LOD	< LOD	< LOD	< LOD	< LOD	1.29648	0.060748	0.166676	< LOD	0.133379	< LOD	0.125614	< LOD	< LOD	< LOD	< LOD
TG(18:0_36:5)	HMDB0044687	< LOD	< LOD	< LOD	< LOD	< LOD	< LOD	< LOD	0.0614445	< LOD	< LOD	< LOD	< LOD	< LOD	< LOD	< LOD	< LOD	< LOD	< LOD	< LOD	< LOD	< LOD	< LOD	< LOD	< LOD	< LOD	< LOD	< LOD	< LOD	< LOD	< LOD	< LOD	< LOD	< LOD	< LOD	< LOD	< LOD	< LOD	0.113479	< LOD	< LOD	< LOD	< LOD	< LOD	< LOD	< LOD	< LOD	< LOD	< LOD
TG(18:0_38:6)	HMDB0005412	< LOD	< LOD	< LOD	< LOD	< LOD	< LOD	< LOD	0.051363	< LOD	< LOD	< LOD	< LOD	< LOD	< LOD	< LOD	< LOD	< LOD	< LOD	< LOD	< LOD	< LOD	< LOD	< LOD	< LOD	< LOD	< LOD	< LOD	< LOD	< LOD	< LOD	< LOD	< LOD	< LOD	< LOD	< LOD	< LOD	< LOD	0.0817209	< LOD	< LOD	< LOD	< LOD	< LOD	< LOD	< LOD	< LOD	< LOD	< LOD
TG(18:0_38:7)	HMDB0044909	< LOD	< LOD	< LOD	< LOD	< LOD	< LOD	< LOD	0.0396918	< LOD	< LOD	< LOD	< LOD	< LOD	< LOD	< LOD	< LOD	< LOD	< LOD	< LOD	< LOD	< LOD	< LOD	< LOD	< LOD	< LOD	< LOD	< LOD	< LOD	< LOD	< LOD	< LOD	< LOD	< LOD	< LOD	< LOD	< LOD	< LOD	< LOD	< LOD	< LOD	< LOD	< LOD	< LOD	< LOD	< LOD	< LOD	< LOD	< LOD
TG(18:1_26:0)	N/A	< LOD	< LOD	< LOD	< LOD	< LOD	< LOD	0.0272677	0.0146323	< LOD	0.0161	< LOD	< LOD	< LOD	< LOD	< LOD	< LOD	< LOD	0.0303947	< LOD	< LOD	< LOD	< LOD	< LOD	< LOD	< LOD	< LOD	< LOD	< LOD	< LOD	< LOD	0.0377862	< LOD	< LOD	< LOD	< LOD	< LOD	0.0347916	8.54052	< LOD	0.0168301	0.0253751	0.874593	< LOD	0.0409667	0.0392899	< LOD	0.0215829	< LOD
TG(18:1_28:1)	N/A	0.183256	0.0376428	< LOD	< LOD	< LOD	< LOD	0.083025	0.0281679	< LOD	< LOD	< LOD	< LOD	< LOD	< LOD	< LOD	< LOD	< LOD	< LOD	< LOD	< LOD	< LOD	< LOD	< LOD	< LOD	< LOD	< LOD	< LOD	< LOD	< LOD	< LOD	< LOD	< LOD	< LOD	< LOD	< LOD	< LOD	0.0573207	8.31202	< LOD	0.0353664	0.0524137	0.763116	0.0290089	0.0441387	0.0715707	< LOD	0.0316566	0.0321987
TG(18:1_30:0)	N/A	< LOD	< LOD	< LOD	< LOD	< LOD	< LOD	< LOD	0.0579584	< LOD	< LOD	< LOD	< LOD	< LOD	< LOD	< LOD	< LOD	< LOD	0.197799	0.123873	< LOD	< LOD	< LOD	< LOD	< LOD	< LOD	< LOD	< LOD	0.107397	< LOD	< LOD	0.186193	< LOD	< LOD	< LOD	< LOD	< LOD	0.409469	51.8325	0.208776	0.38001	0.268386	4.77301	0.150626	0.19607	0.45365	0.180583	0.337096	0.166645
TG(18:1_30:1)	N/A	< LOD	< LOD	< LOD	< LOD	< LOD	< LOD	< LOD	0.0598702	< LOD	< LOD	< LOD	< LOD	< LOD	< LOD	< LOD	< LOD	< LOD	0.117883	0.0997366	< LOD	< LOD	< LOD	< LOD	< LOD	< LOD	< LOD	< LOD	< LOD	< LOD	< LOD	0.102346	< LOD	< LOD	< LOD	< LOD	< LOD	0.26745	28.0566	0.157697	0.2943	0.318524	2.47718	0.200627	0.284766	0.283656	0.147794	0.310194	0.175356
TG(18:1_30:2)	N/A	0.0158474	< LOD	< LOD	< LOD	< LOD	< LOD	0.0181999	0.0125691	< LOD	< LOD	< LOD	< LOD	< LOD	< LOD	< LOD	< LOD	< LOD	0.0136867	0.0216943	< LOD	0.0152018	< LOD	< LOD	< LOD	< LOD	< LOD	< LOD	< LOD	< LOD	< LOD	< LOD	< LOD	< LOD	< LOD	< LOD	< LOD	0.0440849	3.24316	0.0359448	0.0756084	0.0852162	0.331501	0.055331	0.150102	0.0593661	0.01923	0.0380385	0.0311905
TG(18:1_31:0)	N/A	< LOD	< LOD	< LOD	< LOD	< LOD	< LOD	< LOD	0.0571201	< LOD	< LOD	< LOD	< LOD	< LOD	< LOD	< LOD	< LOD	< LOD	< LOD	< LOD	< LOD	< LOD	< LOD	< LOD	< LOD	< LOD	< LOD	< LOD	< LOD	< LOD	< LOD	< LOD	< LOD	< LOD	< LOD	< LOD	< LOD	0.0624015	6.88263	< LOD	0.0786356	< LOD	1.01746	< LOD	< LOD	0.0839697	< LOD	0.087286	< LOD
TG(18:1_32:0)	HMDB0049092	< LOD	< LOD	< LOD	< LOD	< LOD	< LOD	< LOD	0.0679796	< LOD	< LOD	< LOD	0.0791124	0.0696896	0.161177	< LOD	0.102336	< LOD	0.479418	0.378002	< LOD	0.0815209	0.0835711	< LOD	< LOD	0.0809399	0.148163	< LOD	0.315712	< LOD	0.092988	0.374026	< LOD	< LOD	0.0816064	0.0737423	< LOD	0.814864	91.9257	0.624739	1.22762	0.606805	8.2761	0.265843	0.525097	0.879305	0.443583	0.85304	0.442745
TG(18:1_32:1)	HMDB0010434	0.212582	< LOD	< LOD	< LOD	< LOD	< LOD	< LOD	0.0476685	< LOD	0.0760956	0.0797816	0.116862	0.216217	0.245566	< LOD	0.214178	0.057362	0.597821	0.703653	0.0623869	0.0739552	0.0923494	0.137185	< LOD	0.0874442	0.279346	0.0805845	0.433629	0.073353	0.215165	0.343674	0.0734079	< LOD	0.125979	0.151133	< LOD	1.13321	104.479	0.948813	1.85219	1.519	8.09856	0.720595	0.677281	1.09351	1.19504	1.74247	0.875666
TG(18:1_32:2)	HMDB0010436	1.31239	0.161867	0.35107	< LOD	< LOD	< LOD	< LOD	0.0338069	0.222699	0.678084	0.780541	0.742533	< LOD	< LOD	< LOD	< LOD	< LOD	< LOD	0.474499	< LOD	< LOD	< LOD	< LOD	< LOD	< LOD	< LOD	< LOD	< LOD	< LOD	< LOD	< LOD	< LOD	< LOD	< LOD	< LOD	< LOD	< LOD	17.2201	0.0661909	0.489769	0.242957	1.44014	< LOD	0.116288	< LOD	0.17084	0.172929	< LOD
TG(18:1_32:3)	HMDB0049079	0.0251879	< LOD	< LOD	< LOD	< LOD	< LOD	0.0257986	0.010819	< LOD	< LOD	< LOD	< LOD	< LOD	0.014233	< LOD	< LOD	< LOD	< LOD	< LOD	< LOD	< LOD	< LOD	< LOD	< LOD	< LOD	< LOD	< LOD	< LOD	< LOD	< LOD	< LOD	< LOD	< LOD	< LOD	< LOD	< LOD	0.0242601	1.56991	0.029029	0.0881815	0.0583645	0.186241	0.0303305	0.034599	0.0201655	0.0332939	0.0219923	0.0162323
TG(18:1_33:0)	HMDB0049113	< LOD	< LOD	< LOD	< LOD	< LOD	< LOD	< LOD	0.0172054	< LOD	< LOD	< LOD	< LOD	< LOD	< LOD	< LOD	< LOD	< LOD	0.0382495	0.0303349	< LOD	< LOD	< LOD	< LOD	< LOD	< LOD	< LOD	< LOD	< LOD	< LOD	< LOD	0.0418224	< LOD	< LOD	< LOD	< LOD	< LOD	0.0564168	4.81871	0.0359648	0.0867162	0.0454644	0.767522	0.0231959	0.0282934	0.0795136	0.0418961	0.0849079	0.0291996
TG(18:1_33:1)	HMDB0049094	< LOD	< LOD	< LOD	< LOD	< LOD	< LOD	< LOD	0.0285757	< LOD	< LOD	< LOD	< LOD	0.042891	0.0525952	< LOD	< LOD	< LOD	0.107641	0.0766117	< LOD	< LOD	< LOD	< LOD	< LOD	< LOD	0.0613225	< LOD	0.0449392	< LOD	0.0323543	0.0503162	< LOD	< LOD	< LOD	0.031399	< LOD	0.153455	10.073	0.164878	0.297206	0.194715	1.67821	0.0789051	0.0995275	0.176781	0.206138	0.270793	0.148204
TG(18:1_33:2)	HMDB0049099	< LOD	< LOD	< LOD	< LOD	< LOD	< LOD	< LOD	0.0840144	< LOD	< LOD	< LOD	< LOD	< LOD	< LOD	< LOD	< LOD	< LOD	< LOD	< LOD	< LOD	< LOD	< LOD	< LOD	< LOD	< LOD	< LOD	< LOD	< LOD	< LOD	< LOD	< LOD	< LOD	< LOD	< LOD	< LOD	< LOD	< LOD	1.47453	< LOD	0.0947927	< LOD	0.25529	< LOD	< LOD	< LOD	< LOD	< LOD	< LOD
TG(18:1_34:1)	HMDB0010437	< LOD	< LOD	< LOD	< LOD	< LOD	< LOD	< LOD	0.118412	< LOD	< LOD	< LOD	0.54098	1.17012	1.26829	0.394199	0.732795	0.541782	2.40552	2.77789	0.471846	0.520498	1.10007	0.936086	< LOD	0.438329	1.57786	0.590869	2.28932	0.62185	0.977191	1.11145	0.438583	< LOD	0.858025	0.766147	< LOD	5.40514	305.632	5.92634	9.62244	7.76473	27.5137	3.21895	4.03586	4.48911	6.79332	6.63654	4.89637
TG(18:1_34:2)	HMDB0010439	0.0178576	< LOD	< LOD	0.0434509	0.0347416	0.0224372	0.020963	0.0113141	< LOD	< LOD	0.0243974	0.184622	0.502714	0.811693	0.37277	0.326321	0.305393	0.756143	1.33021	0.273343	0.327635	0.588374	0.357931	0.0162689	0.161392	0.670535	0.276696	0.689996	0.298339	0.415063	0.341452	0.236287	0.0996491	0.513101	0.378574	0.0231468	2.49496	83.932	3.45219	6.5929	4.40106	8.47845	1.82395	2.91391	2.2341	3.51002	3.1933	2.52132
TG(18:1_34:3)	HMDB0049121	< LOD	< LOD	< LOD	< LOD	< LOD	< LOD	< LOD	0.0860102	< LOD	< LOD	< LOD	< LOD	< LOD	0.169985	< LOD	< LOD	< LOD	0.109646	0.186599	< LOD	< LOD	< LOD	< LOD	< LOD	< LOD	0.0896387	< LOD	< LOD	< LOD	< LOD	< LOD	< LOD	< LOD	< LOD	< LOD	< LOD	0.392919	9.61759	0.540475	1.29158	0.722498	1.19607	0.346363	0.558094	0.308358	0.564248	0.453901	0.411574
TG(18:1_34:4)	HMDB0049129	0.0868446	< LOD	0.0178492	< LOD	< LOD	< LOD	0.0202323	0.0126056	< LOD	< LOD	0.0453831	0.0602712	< LOD	< LOD	< LOD	< LOD	< LOD	< LOD	0.0219321	< LOD	< LOD	< LOD	< LOD	< LOD	< LOD	< LOD	< LOD	< LOD	< LOD	< LOD	< LOD	< LOD	< LOD	< LOD	< LOD	< LOD	0.0220714	1.08374	0.0382448	0.159884	0.0607881	0.155523	0.0403285	0.0681396	0.0365293	< LOD	0.0411875	0.0299113
TG(18:1_35:2)	HMDB0049101	< LOD	< LOD	< LOD	< LOD	< LOD	< LOD	< LOD	0.0647384	< LOD	< LOD	< LOD	< LOD	< LOD	< LOD	< LOD	< LOD	< LOD	< LOD	0.101388	< LOD	< LOD	< LOD	< LOD	< LOD	< LOD	0.0664329	< LOD	< LOD	< LOD	< LOD	< LOD	< LOD	< LOD	< LOD	< LOD	< LOD	0.108064	2.81068	0.111627	0.220434	0.133018	0.495698	0.0696891	0.0974252	0.0926224	0.14932	0.139006	0.0902632
TG(18:1_35:3)	HMDB0049096	< LOD	< LOD	< LOD	< LOD	< LOD	< LOD	< LOD	0.0402342	< LOD	< LOD	< LOD	< LOD	< LOD	< LOD	< LOD	< LOD	< LOD	< LOD	< LOD	< LOD	< LOD	< LOD	< LOD	< LOD	< LOD	< LOD	< LOD	< LOD	< LOD	< LOD	< LOD	< LOD	< LOD	< LOD	< LOD	< LOD	< LOD	0.461545	< LOD	0.0666054	0.0415038	0.0925323	< LOD	< LOD	< LOD	< LOD	< LOD	< LOD
TG(18:1_36:0)	HMDB0049155	< LOD	< LOD	< LOD	< LOD	< LOD	< LOD	< LOD	0.0280009	< LOD	< LOD	< LOD	< LOD	< LOD	< LOD	< LOD	< LOD	< LOD	< LOD	< LOD	< LOD	< LOD	< LOD	< LOD	< LOD	< LOD	< LOD	< LOD	0.0290604	< LOD	< LOD	< LOD	< LOD	< LOD	< LOD	< LOD	< LOD	0.0404562	2.19777	< LOD	0.0486608	0.053963	0.232551	< LOD	0.0457955	< LOD	< LOD	0.0331134	< LOD
TG(18:1_36:1)	HMDB0049116	1.07288	0.421436	0.43308	0.0921975	0.224638	0.14642	0.261215	0.0638087	< LOD	< LOD	< LOD	< LOD	0.0808265	0.123301	0.0649429	< LOD	< LOD	0.143938	0.202607	< LOD	0.0711437	0.110345	< LOD	< LOD	< LOD	0.127295	< LOD	0.316823	0.0702777	0.0818037	< LOD	< LOD	< LOD	< LOD	0.0748386	< LOD	0.409702	20.5409	0.330434	0.635353	0.801045	1.79603	0.273396	0.589083	0.343726	0.48955	0.402771	0.444248
TG(18:1_36:2)	HMDB0010447	32.0238	11.4218	13.5774	2.50981	4.91432	3.85839	6.14612	0.0334475	< LOD	0.0694176	0.0394371	0.443313	1.13602	1.15553	0.631386	0.602559	0.680515	1.25787	2.1996	0.403796	0.642964	1.02045	0.739686	0.0336239	0.38269	1.53693	0.599352	3.6255	0.810969	1.03399	0.597258	0.546871	0.194101	0.637953	0.740221	0.0824011	4.68187	188.484	4.35004	8.58625	11.1062	13.4935	3.51368	6.04693	3.41438	6.7825	4.51997	5.4344
TG(18:1_36:3)	HMDB0049142	< LOD	< LOD	< LOD	< LOD	< LOD	< LOD	< LOD	0.0883774	< LOD	< LOD	< LOD	< LOD	0.18284	0.387402	0.282874	< LOD	0.135559	0.203693	0.370987	0.105968	0.22834	0.220309	0.133482	< LOD	< LOD	0.295262	0.0936195	0.408717	0.168852	0.151796	0.0884665	0.0997055	< LOD	0.167516	0.177324	< LOD	0.971039	22.3331	1.33141	3.15347	2.31902	2.34222	0.8772	2.05437	0.820801	1.47467	0.939028	1.15818
TG(18:1_36:4)	HMDB0049150	< LOD	< LOD	< LOD	< LOD	< LOD	< LOD	< LOD	0.0680639	< LOD	< LOD	< LOD	< LOD	< LOD	0.14623	0.0986798	< LOD	< LOD	< LOD	0.0729938	< LOD	0.0714825	< LOD	< LOD	< LOD	< LOD	< LOD	< LOD	< LOD	< LOD	< LOD	< LOD	< LOD	< LOD	< LOD	< LOD	< LOD	0.310124	5.4132	0.4113	1.3167	0.629762	0.712858	0.268656	0.804442	0.214671	0.312659	0.21769	0.275925
TG(18:1_36:5)	HMDB0049276	< LOD	< LOD	< LOD	< LOD	< LOD	< LOD	< LOD	0.0987809	< LOD	< LOD	< LOD	< LOD	< LOD	< LOD	< LOD	< LOD	< LOD	< LOD	< LOD	< LOD	< LOD	< LOD	< LOD	< LOD	< LOD	< LOD	< LOD	< LOD	< LOD	< LOD	< LOD	< LOD	< LOD	< LOD	< LOD	< LOD	< LOD	0.939177	< LOD	0.290737	0.106389	0.16572	< LOD	0.161823	< LOD	< LOD	< LOD	< LOD
TG(18:1_36:6)	HMDB0049402	< LOD	< LOD	< LOD	< LOD	< LOD	< LOD	< LOD	0.0380106	< LOD	< LOD	< LOD	< LOD	< LOD	< LOD	< LOD	< LOD	< LOD	< LOD	< LOD	< LOD	< LOD	< LOD	< LOD	< LOD	< LOD	< LOD	< LOD	< LOD	< LOD	< LOD	< LOD	< LOD	< LOD	< LOD	< LOD	< LOD	< LOD	0.108656	< LOD	< LOD	< LOD	< LOD	< LOD	< LOD	< LOD	< LOD	< LOD	< LOD
TG(18:1_38:5)	HMDB0049390	< LOD	< LOD	< LOD	< LOD	< LOD	< LOD	< LOD	0.013533	< LOD	< LOD	< LOD	< LOD	< LOD	< LOD	< LOD	< LOD	< LOD	< LOD	< LOD	< LOD	< LOD	< LOD	< LOD	< LOD	< LOD	< LOD	< LOD	< LOD	< LOD	< LOD	< LOD	< LOD	< LOD	< LOD	< LOD	< LOD	0.0425579	0.855197	0.0685832	0.135931	0.101543	0.203718	0.0655696	0.0849667	0.0232543	0.0564652	0.0507961	0.0924125
TG(18:1_38:6)	HMDB0049397	< LOD	< LOD	< LOD	< LOD	< LOD	< LOD	< LOD	0.016958	< LOD	< LOD	< LOD	< LOD	< LOD	< LOD	< LOD	< LOD	< LOD	< LOD	< LOD	< LOD	< LOD	< LOD	< LOD	< LOD	< LOD	< LOD	< LOD	< LOD	< LOD	< LOD	< LOD	< LOD	< LOD	< LOD	< LOD	< LOD	0.0273325	0.413816	0.0363691	0.0538937	0.0447448	0.117889	0.0227091	0.062329	< LOD	0.0372215	0.0188052	0.0311117
TG(18:1_38:7)	HMDB0049423	< LOD	< LOD	< LOD	< LOD	< LOD	< LOD	< LOD	0.0309826	< LOD	< LOD	< LOD	< LOD	< LOD	< LOD	< LOD	< LOD	< LOD	< LOD	< LOD	< LOD	< LOD	< LOD	< LOD	< LOD	< LOD	< LOD	< LOD	< LOD	< LOD	< LOD	< LOD	< LOD	< LOD	< LOD	< LOD	< LOD	< LOD	0.0489583	< LOD	< LOD	< LOD	< LOD	< LOD	< LOD	< LOD	< LOD	< LOD	< LOD
TG(18:2_28:0)	N/A	< LOD	< LOD	< LOD	< LOD	< LOD	< LOD	< LOD	0.0159899	< LOD	< LOD	< LOD	< LOD	< LOD	< LOD	< LOD	< LOD	< LOD	< LOD	< LOD	< LOD	< LOD	< LOD	< LOD	< LOD	< LOD	< LOD	< LOD	< LOD	< LOD	< LOD	< LOD	< LOD	< LOD	< LOD	< LOD	< LOD	0.0321372	4.24602	< LOD	0.0328997	0.0218379	0.420356	< LOD	0.0849347	0.0423937	< LOD	< LOD	< LOD
TG(18:2_30:0)	N/A	< LOD	< LOD	< LOD	< LOD	< LOD	< LOD	< LOD	0.0165844	< LOD	< LOD	< LOD	< LOD	< LOD	0.0227432	< LOD	< LOD	< LOD	0.0493804	0.032157	< LOD	< LOD	< LOD	< LOD	< LOD	< LOD	< LOD	< LOD	0.0171137	< LOD	< LOD	0.0504251	< LOD	< LOD	< LOD	< LOD	< LOD	0.113751	11.7894	0.0939654	0.200078	0.0995879	1.26446	0.0558769	0.12618	0.163819	0.0364037	0.103212	0.0484339
TG(18:2_30:1)	N/A	< LOD	< LOD	< LOD	< LOD	< LOD	< LOD	< LOD	0.106019	< LOD	< LOD	< LOD	< LOD	< LOD	< LOD	< LOD	< LOD	< LOD	< LOD	< LOD	< LOD	< LOD	< LOD	< LOD	< LOD	< LOD	< LOD	< LOD	< LOD	< LOD	< LOD	< LOD	< LOD	< LOD	< LOD	< LOD	< LOD	< LOD	5.09353	< LOD	0.138066	0.106842	0.584264	< LOD	0.176921	< LOD	< LOD	< LOD	< LOD
TG(18:2_31:0)	N/A	< LOD	< LOD	< LOD	< LOD	< LOD	< LOD	< LOD	0.0139645	< LOD	< LOD	< LOD	< LOD	< LOD	< LOD	< LOD	< LOD	< LOD	< LOD	< LOD	< LOD	< LOD	< LOD	< LOD	< LOD	< LOD	< LOD	< LOD	< LOD	< LOD	< LOD	< LOD	< LOD	< LOD	< LOD	< LOD	< LOD	0.0161517	1.73125	0.0202264	0.0381298	0.0146912	0.245691	< LOD	< LOD	0.0190106	< LOD	0.0180286	< LOD
TG(18:2_32:0)	HMDB0052410	< LOD	< LOD	< LOD	< LOD	< LOD	< LOD	< LOD	0.0152183	< LOD	< LOD	< LOD	0.0188558	0.0171502	0.0739178	< LOD	0.0163581	< LOD	0.127839	0.0617823	0.0156157	0.0286312	0.0420272	< LOD	< LOD	0.0247901	0.0352517	< LOD	0.0494696	< LOD	0.015562	0.0975328	< LOD	< LOD	0.0376633	0.0209828	< LOD	0.253317	20.996	0.342241	0.628129	0.227446	2.15336	0.109359	0.341483	0.347038	0.130873	0.312115	0.13838
TG(18:2_32:1)	HMDB0052515	0.0603507	< LOD	0.0167354	< LOD	< LOD	< LOD	< LOD	0.015731	0.0233731	0.033222	0.0254914	0.0350606	0.051692	0.132683	0.0188027	0.0494922	0.0167858	0.146338	0.215255	0.0289542	0.0452827	0.0226665	0.0239751	< LOD	0.0257272	0.057059	< LOD	0.0680397	0.0243088	0.0477712	0.0743354	0.0240662	< LOD	0.057034	0.0513459	< LOD	0.347496	20.959	0.475724	1.02419	0.546912	1.91065	0.273332	0.500372	0.364759	0.346776	0.519593	0.295323
TG(18:2_32:2)	HMDB0010470	0.66794	0.119328	0.120258	< LOD	< LOD	< LOD	< LOD	0.0278329	0.086923	0.301542	0.352503	0.223007	< LOD	< LOD	< LOD	< LOD	< LOD	< LOD	0.185598	< LOD	< LOD	< LOD	< LOD	< LOD	< LOD	< LOD	< LOD	< LOD	< LOD	< LOD	< LOD	< LOD	< LOD	< LOD	< LOD	< LOD	< LOD	3.67544	< LOD	0.264198	0.0588621	0.308877	< LOD	0.0919061	< LOD	0.0324915	0.0280652	< LOD
TG(18:2_33:0)	HMDB0052425	< LOD	< LOD	< LOD	< LOD	< LOD	< LOD	< LOD	0.0602071	< LOD	< LOD	< LOD	< LOD	< LOD	< LOD	< LOD	< LOD	< LOD	< LOD	< LOD	< LOD	< LOD	< LOD	< LOD	< LOD	< LOD	< LOD	< LOD	< LOD	< LOD	< LOD	< LOD	< LOD	< LOD	< LOD	< LOD	< LOD	< LOD	1.05897	< LOD	< LOD	< LOD	0.168015	< LOD	< LOD	< LOD	< LOD	< LOD	< LOD
TG(18:2_33:1)	N/A	< LOD	< LOD	< LOD	< LOD	< LOD	< LOD	< LOD	0.0557208	< LOD	< LOD	< LOD	< LOD	< LOD	< LOD	< LOD	< LOD	< LOD	< LOD	< LOD	< LOD	< LOD	< LOD	< LOD	< LOD	< LOD	< LOD	< LOD	< LOD	< LOD	< LOD	< LOD	< LOD	< LOD	< LOD	< LOD	< LOD	< LOD	2.12461	0.0785618	0.149213	0.0667021	0.35464	< LOD	< LOD	0.0763557	< LOD	0.0740479	< LOD
TG(18:2_33:2)	HMDB0052411	< LOD	< LOD	< LOD	< LOD	< LOD	< LOD	< LOD	0.0810288	< LOD	< LOD	< LOD	< LOD	< LOD	< LOD	< LOD	< LOD	< LOD	< LOD	< LOD	< LOD	< LOD	< LOD	< LOD	< LOD	< LOD	< LOD	< LOD	< LOD	< LOD	< LOD	< LOD	< LOD	< LOD	< LOD	< LOD	< LOD	< LOD	0.285952	< LOD	< LOD	< LOD	< LOD	< LOD	< LOD	< LOD	< LOD	< LOD	< LOD
TG(18:2_34:0)	HMDB0052440	< LOD	< LOD	< LOD	< LOD	< LOD	< LOD	< LOD	0.101999	< LOD	< LOD	< LOD	< LOD	< LOD	< LOD	< LOD	< LOD	< LOD	< LOD	< LOD	< LOD	< LOD	< LOD	< LOD	< LOD	< LOD	< LOD	< LOD	< LOD	< LOD	< LOD	< LOD	< LOD	< LOD	< LOD	< LOD	< LOD	0.209064	9.79546	0.289512	0.578296	0.324373	1.26446	0.127677	0.308211	0.259009	0.235388	0.235006	0.168087
TG(18:2_34:1)	HMDB0052530	0.0245893	< LOD	< LOD	0.0457893	0.0267805	0.0201015	< LOD	0.0154051	< LOD	< LOD	0.0291929	0.161461	0.331205	0.746363	0.305473	0.186711	0.242072	0.652955	0.904024	0.221915	0.275919	0.46658	0.217508	< LOD	0.175314	0.457675	0.152965	0.429052	0.194721	0.234182	0.276528	0.15185	0.0730312	0.391012	0.257531	0.0174541	1.86461	59.8793	3.00251	5.61008	2.78319	6.71406	1.28695	2.64587	1.85672	2.14043	2.15362	1.54627
TG(18:2_34:2)	HMDB0052426	< LOD	< LOD	< LOD	0.0273216	< LOD	< LOD	0.0197418	0.0185363	< LOD	< LOD	0.029498	0.0463815	0.155843	0.400146	0.279306	0.0584964	0.127933	0.174547	0.401362	0.127311	0.137163	0.213825	0.0777814	< LOD	0.0682911	0.184079	0.0531932	0.106869	0.0929522	0.081223	0.0704958	0.0616176	0.0562056	0.180923	0.152515	< LOD	0.914323	17.1282	1.5278	3.72864	1.30075	1.93651	0.607319	1.7257	0.786315	1.01011	0.945625	0.737102
TG(18:2_34:3)	HMDB0052427	< LOD	< LOD	< LOD	< LOD	< LOD	< LOD	< LOD	0.114032	< LOD	< LOD	< LOD	< LOD	< LOD	< LOD	< LOD	< LOD	< LOD	< LOD	< LOD	< LOD	< LOD	< LOD	< LOD	< LOD	< LOD	< LOD	< LOD	< LOD	< LOD	< LOD	< LOD	< LOD	< LOD	< LOD	< LOD	< LOD	0.126395	1.97178	0.187603	0.700614	0.246981	0.294287	0.134122	0.291553	0.123315	< LOD	0.12093	< LOD
TG(18:2_34:4)	HMDB0052435	0.0986228	< LOD	< LOD	< LOD	< LOD	< LOD	< LOD	0.0747762	< LOD	< LOD	< LOD	< LOD	< LOD	< LOD	< LOD	< LOD	< LOD	< LOD	< LOD	< LOD	< LOD	< LOD	< LOD	< LOD	< LOD	< LOD	< LOD	< LOD	< LOD	< LOD	< LOD	< LOD	< LOD	< LOD	< LOD	< LOD	< LOD	0.518805	< LOD	< LOD	< LOD	< LOD	< LOD	< LOD	< LOD	< LOD	< LOD	< LOD
TG(18:2_35:1)	N/A	< LOD	< LOD	< LOD	< LOD	< LOD	< LOD	< LOD	0.0440479	< LOD	< LOD	< LOD	< LOD	< LOD	< LOD	< LOD	< LOD	< LOD	< LOD	< LOD	< LOD	< LOD	< LOD	< LOD	< LOD	< LOD	< LOD	< LOD	< LOD	< LOD	< LOD	< LOD	< LOD	< LOD	< LOD	< LOD	< LOD	< LOD	1.16007	0.054035	0.0857418	0.0633483	0.210199	< LOD	< LOD	< LOD	< LOD	< LOD	< LOD
TG(18:2_35:2)	HMDB0052413	< LOD	< LOD	< LOD	< LOD	< LOD	< LOD	< LOD	0.0849827	< LOD	< LOD	< LOD	< LOD	< LOD	< LOD	< LOD	< LOD	< LOD	< LOD	< LOD	< LOD	< LOD	< LOD	< LOD	< LOD	< LOD	< LOD	< LOD	< LOD	< LOD	< LOD	< LOD	< LOD	< LOD	< LOD	< LOD	< LOD	< LOD	0.571278	< LOD	0.115119	< LOD	0.11498	< LOD	< LOD	< LOD	< LOD	< LOD	< LOD
TG(18:2_35:3)	HMDB0052414	< LOD	< LOD	< LOD	< LOD	< LOD	< LOD	< LOD	0.156745	< LOD	< LOD	< LOD	< LOD	< LOD	< LOD	< LOD	< LOD	< LOD	< LOD	< LOD	< LOD	< LOD	< LOD	< LOD	< LOD	< LOD	< LOD	< LOD	< LOD	< LOD	< LOD	< LOD	< LOD	< LOD	< LOD	< LOD	< LOD	< LOD	< LOD	< LOD	< LOD	< LOD	< LOD	< LOD	< LOD	< LOD	< LOD	< LOD	< LOD
TG(18:2_36:0)	HMDB0052455	< LOD	< LOD	< LOD	< LOD	< LOD	< LOD	< LOD	0.0642923	< LOD	< LOD	< LOD	< LOD	< LOD	< LOD	< LOD	< LOD	< LOD	< LOD	< LOD	< LOD	< LOD	< LOD	< LOD	< LOD	< LOD	< LOD	< LOD	< LOD	< LOD	< LOD	< LOD	< LOD	< LOD	< LOD	< LOD	< LOD	< LOD	0.47375	< LOD	< LOD	< LOD	< LOD	< LOD	< LOD	< LOD	< LOD	< LOD	< LOD
TG(18:2_36:1)	HMDB0052545	< LOD	< LOD	< LOD	< LOD	< LOD	< LOD	< LOD	0.0738287	< LOD	< LOD	< LOD	< LOD	< LOD	< LOD	< LOD	< LOD	< LOD	< LOD	< LOD	< LOD	< LOD	< LOD	< LOD	< LOD	< LOD	< LOD	< LOD	< LOD	< LOD	< LOD	< LOD	< LOD	< LOD	< LOD	< LOD	< LOD	0.179798	4.84333	0.231912	0.457128	0.311399	0.547918	0.121156	0.356181	0.156766	0.158938	0.157185	0.150424
TG(18:2_36:2)	HMDB0052441	< LOD	< LOD	< LOD	< LOD	< LOD	< LOD	< LOD	0.0503472	< LOD	< LOD	< LOD	< LOD	0.111126	0.221787	0.152875	< LOD	0.0766264	0.116129	0.188146	0.0606553	0.12763	0.125501	0.0611567	< LOD	< LOD	0.155706	0.0550742	0.210437	0.104289	0.0703503	< LOD	0.0552143	< LOD	0.0919008	0.0860752	< LOD	0.579899	12.7672	0.715482	1.74692	1.21187	1.06233	0.461132	1.23119	0.451175	0.704721	0.441872	0.638933
TG(18:2_36:3)	HMDB0052442	< LOD	< LOD	< LOD	< LOD	< LOD	< LOD	< LOD	0.0191051	< LOD	0.0201204	0.0274031	0.0297734	0.034911	0.16284	0.15233	< LOD	0.038175	0.0483226	0.0822614	0.0390548	0.0926786	0.0686029	0.0216258	< LOD	< LOD	0.0630057	0.0200997	0.0591358	0.0403063	0.019498	< LOD	0.0228793	< LOD	0.0508115	0.0332825	< LOD	0.355929	4.34058	0.437124	1.59595	0.55407	0.507317	0.258954	1.07249	0.236631	0.284423	0.235661	0.300448
TG(18:2_36:4)	HMDB0052450	< LOD	< LOD	< LOD	< LOD	< LOD	< LOD	< LOD	0.0133239	0.015832	0.0236596	0.0399254	< LOD	< LOD	0.0616452	0.0553575	< LOD	< LOD	0.0212314	0.0231854	< LOD	0.0340167	0.016842	< LOD	< LOD	< LOD	0.0242985	< LOD	< LOD	< LOD	< LOD	< LOD	< LOD	< LOD	0.0147652	< LOD	< LOD	0.126644	1.18705	0.144324	0.74744	0.195725	0.161358	0.085884	0.353527	0.0711558	0.0713869	0.0596189	0.0761279
TG(18:2_36:5)	HMDB0052540	< LOD	< LOD	< LOD	< LOD	< LOD	< LOD	< LOD	0.0418098	< LOD	< LOD	< LOD	< LOD	< LOD	< LOD	< LOD	< LOD	< LOD	< LOD	< LOD	< LOD	< LOD	< LOD	< LOD	< LOD	< LOD	< LOD	< LOD	< LOD	< LOD	< LOD	< LOD	< LOD	< LOD	< LOD	< LOD	< LOD	< LOD	0.152166	< LOD	0.193769	0.0438221	< LOD	< LOD	0.0714579	< LOD	< LOD	< LOD	< LOD
TG(18:2_38:4)	HMDB0052445	< LOD	< LOD	< LOD	< LOD	< LOD	< LOD	< LOD	0.0294086	< LOD	< LOD	< LOD	< LOD	< LOD	< LOD	< LOD	< LOD	< LOD	< LOD	< LOD	< LOD	< LOD	< LOD	< LOD	< LOD	< LOD	< LOD	< LOD	< LOD	< LOD	< LOD	< LOD	< LOD	< LOD	< LOD	< LOD	< LOD	< LOD	0.201505	< LOD	0.0776851	0.0322607	0.0319278	< LOD	0.0370051	< LOD	< LOD	< LOD	< LOD
TG(18:2_38:5)	HMDB0052452	< LOD	< LOD	< LOD	< LOD	< LOD	< LOD	< LOD	0.0800538	< LOD	< LOD	< LOD	< LOD	< LOD	< LOD	< LOD	< LOD	< LOD	< LOD	< LOD	< LOD	< LOD	< LOD	< LOD	< LOD	< LOD	< LOD	< LOD	< LOD	< LOD	< LOD	< LOD	< LOD	< LOD	< LOD	< LOD	< LOD	< LOD	0.220648	< LOD	< LOD	< LOD	< LOD	< LOD	< LOD	< LOD	< LOD	< LOD	< LOD
TG(18:2_38:6)	HMDB0052542	< LOD	< LOD	< LOD	< LOD	< LOD	< LOD	< LOD	0.0199424	< LOD	< LOD	< LOD	< LOD	< LOD	< LOD	< LOD	< LOD	< LOD	< LOD	< LOD	< LOD	< LOD	< LOD	< LOD	< LOD	< LOD	< LOD	< LOD	< LOD	< LOD	< LOD	< LOD	< LOD	< LOD	< LOD	< LOD	< LOD	< LOD	0.0596258	< LOD	0.0319325	< LOD	0.0218216	< LOD	0.0420431	< LOD	< LOD	< LOD	< LOD
TG(18:3_30:0)	N/A	< LOD	< LOD	< LOD	< LOD	< LOD	< LOD	< LOD	0.0450286	< LOD	< LOD	< LOD	< LOD	< LOD	< LOD	< LOD	< LOD	< LOD	< LOD	< LOD	< LOD	< LOD	< LOD	< LOD	< LOD	< LOD	< LOD	< LOD	< LOD	< LOD	< LOD	< LOD	< LOD	< LOD	< LOD	< LOD	< LOD	< LOD	2.22252	< LOD	< LOD	< LOD	0.171943	< LOD	< LOD	< LOD	< LOD	< LOD	< LOD
TG(18:3_32:0)	HMDB0052858	< LOD	< LOD	< LOD	< LOD	< LOD	< LOD	< LOD	0.0474448	< LOD	< LOD	< LOD	< LOD	< LOD	< LOD	< LOD	< LOD	< LOD	< LOD	< LOD	< LOD	< LOD	< LOD	< LOD	< LOD	< LOD	< LOD	< LOD	< LOD	< LOD	< LOD	< LOD	< LOD	< LOD	< LOD	< LOD	< LOD	< LOD	3.90059	< LOD	0.0841685	< LOD	0.411452	< LOD	< LOD	0.0760505	< LOD	< LOD	< LOD
TG(18:3_32:1)	HMDB0052956	< LOD	< LOD	< LOD	< LOD	< LOD	< LOD	< LOD	0.05358	< LOD	< LOD	< LOD	< LOD	< LOD	< LOD	< LOD	< LOD	< LOD	< LOD	< LOD	< LOD	< LOD	< LOD	< LOD	< LOD	< LOD	< LOD	< LOD	< LOD	< LOD	< LOD	< LOD	< LOD	< LOD	< LOD	< LOD	< LOD	< LOD	3.48784	< LOD	0.161472	0.0659111	0.310111	< LOD	0.0602962	0.0802288	< LOD	< LOD	< LOD
TG(18:3_34:0)	HMDB0052886	< LOD	< LOD	< LOD	< LOD	< LOD	< LOD	< LOD	0.021917	< LOD	< LOD	< LOD	< LOD	< LOD	< LOD	< LOD	< LOD	< LOD	< LOD	< LOD	< LOD	< LOD	< LOD	< LOD	< LOD	< LOD	< LOD	< LOD	< LOD	< LOD	< LOD	< LOD	< LOD	< LOD	< LOD	< LOD	< LOD	0.0232377	1.5225	0.0275558	0.0738319	0.0363164	0.179529	0.022912	0.0324187	0.031043	< LOD	< LOD	< LOD
TG(18:3_34:1)	HMDB0052970	< LOD	< LOD	< LOD	< LOD	< LOD	< LOD	< LOD	0.0110944	< LOD	< LOD	< LOD	< LOD	0.0284057	0.0746144	0.0122948	0.0174418	0.018067	0.112001	0.0653372	0.0128952	0.0296452	0.0297616	0.014848	< LOD	< LOD	0.0506643	0.0121605	0.0302041	0.0201715	0.0230794	0.029794	0.0231479	< LOD	0.0355285	0.0164516	< LOD	0.24468	9.78992	0.300501	0.821253	0.36998	1.0794	0.245807	0.326375	0.261097	0.186937	0.233071	0.226119
TG(18:3_34:2)	HMDB0052846	< LOD	< LOD	< LOD	< LOD	< LOD	< LOD	< LOD	0.0614634	< LOD	< LOD	< LOD	< LOD	< LOD	< LOD	< LOD	< LOD	< LOD	< LOD	< LOD	< LOD	< LOD	< LOD	< LOD	< LOD	< LOD	< LOD	< LOD	< LOD	< LOD	< LOD	< LOD	< LOD	< LOD	< LOD	< LOD	< LOD	0.106302	2.8899	0.173087	0.541533	0.206496	0.318512	0.124345	0.171381	0.159449	0.0979194	0.0951421	0.102521
TG(18:3_34:3)	HMDB0052847	< LOD	< LOD	< LOD	< LOD	< LOD	< LOD	< LOD	0.0627553	< LOD	< LOD	< LOD	< LOD	< LOD	< LOD	< LOD	< LOD	< LOD	< LOD	< LOD	< LOD	< LOD	< LOD	< LOD	< LOD	< LOD	< LOD	< LOD	< LOD	< LOD	< LOD	< LOD	< LOD	< LOD	< LOD	< LOD	< LOD	< LOD	0.307191	< LOD	0.103217	< LOD	< LOD	< LOD	< LOD	< LOD	< LOD	< LOD	< LOD
TG(18:3_36:1)	HMDB0052998	< LOD	< LOD	< LOD	< LOD	< LOD	< LOD	< LOD	0.0170603	< LOD	< LOD	< LOD	< LOD	< LOD	< LOD	< LOD	< LOD	< LOD	< LOD	< LOD	< LOD	< LOD	< LOD	< LOD	< LOD	< LOD	< LOD	< LOD	< LOD	< LOD	< LOD	< LOD	< LOD	< LOD	< LOD	< LOD	< LOD	< LOD	0.666782	0.0190232	0.0697627	0.0439047	0.0752441	0.0172376	0.0379406	0.0173878	< LOD	< LOD	0.0174464
TG(18:3_36:2)	HMDB0053068	< LOD	< LOD	< LOD	< LOD	< LOD	< LOD	< LOD	0.0947003	< LOD	< LOD	< LOD	< LOD	< LOD	< LOD	< LOD	< LOD	< LOD	< LOD	< LOD	< LOD	< LOD	< LOD	< LOD	< LOD	< LOD	< LOD	< LOD	< LOD	< LOD	< LOD	< LOD	< LOD	< LOD	< LOD	< LOD	< LOD	< LOD	1.85228	0.0984479	0.327943	0.228304	0.210509	0.120572	0.175425	< LOD	< LOD	< LOD	0.10829
TG(18:3_36:3)	HMDB0052887	< LOD	< LOD	< LOD	< LOD	< LOD	< LOD	< LOD	0.095864	< LOD	< LOD	< LOD	< LOD	< LOD	< LOD	< LOD	< LOD	< LOD	< LOD	< LOD	< LOD	< LOD	< LOD	< LOD	< LOD	< LOD	< LOD	< LOD	< LOD	< LOD	< LOD	< LOD	< LOD	< LOD	< LOD	< LOD	< LOD	< LOD	0.789439	< LOD	0.342986	0.113655	< LOD	< LOD	0.175597	< LOD	< LOD	< LOD	< LOD
TG(18:3_36:4)	HMDB0052895	< LOD	< LOD	< LOD	< LOD	< LOD	< LOD	< LOD	0.0819602	< LOD	< LOD	< LOD	< LOD	< LOD	< LOD	< LOD	< LOD	< LOD	< LOD	< LOD	< LOD	< LOD	< LOD	< LOD	< LOD	< LOD	< LOD	< LOD	< LOD	< LOD	< LOD	< LOD	< LOD	< LOD	< LOD	< LOD	< LOD	< LOD	0.149671	< LOD	0.174804	< LOD	< LOD	< LOD	< LOD	< LOD	< LOD	< LOD	< LOD
TG(18:3_38:5)	HMDB0052979	< LOD	< LOD	< LOD	< LOD	< LOD	< LOD	< LOD	0.0514963	< LOD	< LOD	< LOD	< LOD	< LOD	< LOD	< LOD	< LOD	< LOD	< LOD	< LOD	< LOD	< LOD	< LOD	< LOD	< LOD	< LOD	< LOD	< LOD	< LOD	< LOD	< LOD	< LOD	< LOD	< LOD	< LOD	< LOD	< LOD	< LOD	< LOD	< LOD	< LOD	< LOD	< LOD	< LOD	< LOD	< LOD	< LOD	< LOD	< LOD
TG(18:3_38:6)	HMDB0053063	< LOD	< LOD	< LOD	< LOD	< LOD	< LOD	< LOD	0.04459	< LOD	< LOD	< LOD	< LOD	< LOD	< LOD	< LOD	< LOD	< LOD	< LOD	< LOD	< LOD	< LOD	< LOD	< LOD	< LOD	< LOD	< LOD	< LOD	< LOD	< LOD	< LOD	< LOD	< LOD	< LOD	< LOD	< LOD	< LOD	< LOD	< LOD	< LOD	< LOD	< LOD	< LOD	< LOD	< LOD	< LOD	< LOD	< LOD	< LOD
TG(20:0_32:3)	HMDB0045489	< LOD	< LOD	< LOD	< LOD	< LOD	< LOD	< LOD	0.0624403	< LOD	< LOD	< LOD	< LOD	< LOD	< LOD	< LOD	< LOD	< LOD	< LOD	< LOD	< LOD	< LOD	< LOD	< LOD	< LOD	< LOD	< LOD	< LOD	< LOD	< LOD	< LOD	< LOD	< LOD	< LOD	< LOD	< LOD	< LOD	< LOD	0.0814906	< LOD	< LOD	< LOD	< LOD	< LOD	< LOD	< LOD	< LOD	< LOD	< LOD
TG(20:0_32:4)	HMDB0045497	< LOD	< LOD	< LOD	< LOD	< LOD	< LOD	< LOD	0.118028	< LOD	< LOD	< LOD	< LOD	< LOD	< LOD	< LOD	< LOD	< LOD	< LOD	< LOD	< LOD	< LOD	< LOD	< LOD	< LOD	< LOD	< LOD	< LOD	< LOD	< LOD	< LOD	< LOD	< LOD	< LOD	< LOD	< LOD	< LOD	< LOD	< LOD	< LOD	< LOD	< LOD	< LOD	< LOD	< LOD	< LOD	< LOD	< LOD	< LOD
TG(20:0_34:1)	HMDB0045484	< LOD	< LOD	< LOD	< LOD	< LOD	< LOD	< LOD	0.104206	< LOD	< LOD	< LOD	< LOD	< LOD	< LOD	< LOD	< LOD	< LOD	< LOD	< LOD	< LOD	< LOD	< LOD	< LOD	< LOD	< LOD	< LOD	< LOD	< LOD	< LOD	< LOD	< LOD	< LOD	< LOD	< LOD	< LOD	< LOD	< LOD	0.250528	< LOD	< LOD	< LOD	< LOD	< LOD	< LOD	< LOD	< LOD	< LOD	< LOD
TG(20:1_24:3)	N/A	< LOD	< LOD	< LOD	< LOD	< LOD	< LOD	< LOD	0.0544099	< LOD	< LOD	< LOD	< LOD	< LOD	< LOD	< LOD	< LOD	< LOD	< LOD	< LOD	< LOD	< LOD	< LOD	< LOD	< LOD	< LOD	< LOD	< LOD	< LOD	< LOD	< LOD	< LOD	< LOD	< LOD	< LOD	< LOD	< LOD	< LOD	< LOD	< LOD	< LOD	< LOD	< LOD	< LOD	< LOD	< LOD	< LOD	< LOD	< LOD
TG(20:1_26:1)	N/A	< LOD	< LOD	< LOD	< LOD	< LOD	< LOD	< LOD	0.0528796	< LOD	< LOD	< LOD	< LOD	< LOD	< LOD	< LOD	< LOD	< LOD	< LOD	< LOD	< LOD	< LOD	< LOD	< LOD	< LOD	< LOD	< LOD	< LOD	< LOD	< LOD	< LOD	< LOD	< LOD	< LOD	< LOD	< LOD	< LOD	< LOD	< LOD	< LOD	< LOD	< LOD	< LOD	< LOD	< LOD	< LOD	< LOD	< LOD	< LOD
TG(20:1_30:1)	N/A	< LOD	< LOD	< LOD	< LOD	< LOD	< LOD	< LOD	0.0332626	< LOD	< LOD	< LOD	< LOD	< LOD	< LOD	< LOD	< LOD	< LOD	< LOD	< LOD	< LOD	< LOD	< LOD	< LOD	< LOD	< LOD	< LOD	< LOD	< LOD	< LOD	< LOD	< LOD	< LOD	< LOD	< LOD	< LOD	< LOD	< LOD	0.100789	< LOD	< LOD	< LOD	< LOD	< LOD	< LOD	< LOD	< LOD	< LOD	< LOD
TG(20:1_31:0)	N/A	< LOD	< LOD	< LOD	< LOD	< LOD	< LOD	< LOD	0.0565534	< LOD	< LOD	< LOD	< LOD	< LOD	< LOD	< LOD	< LOD	< LOD	< LOD	< LOD	< LOD	< LOD	< LOD	< LOD	< LOD	< LOD	< LOD	< LOD	< LOD	< LOD	< LOD	< LOD	< LOD	< LOD	< LOD	< LOD	< LOD	< LOD	< LOD	< LOD	< LOD	< LOD	< LOD	< LOD	< LOD	< LOD	< LOD	< LOD	< LOD
TG(20:1_32:1)	HMDB0050451	< LOD	< LOD	< LOD	< LOD	< LOD	< LOD	< LOD	0.0560601	< LOD	< LOD	< LOD	< LOD	< LOD	< LOD	< LOD	< LOD	< LOD	< LOD	< LOD	< LOD	< LOD	< LOD	< LOD	< LOD	< LOD	< LOD	< LOD	< LOD	< LOD	< LOD	< LOD	< LOD	< LOD	< LOD	< LOD	< LOD	< LOD	0.753081	< LOD	< LOD	< LOD	< LOD	< LOD	< LOD	< LOD	< LOD	< LOD	< LOD
TG(20:1_32:2)	HMDB0050304	0.139175	< LOD	< LOD	< LOD	< LOD	< LOD	< LOD	0.0790444	< LOD	< LOD	< LOD	< LOD	< LOD	< LOD	< LOD	< LOD	< LOD	< LOD	< LOD	< LOD	< LOD	< LOD	< LOD	< LOD	< LOD	< LOD	< LOD	< LOD	< LOD	< LOD	< LOD	< LOD	< LOD	< LOD	< LOD	< LOD	< LOD	0.206346	< LOD	< LOD	< LOD	< LOD	< LOD	< LOD	< LOD	< LOD	< LOD	< LOD
TG(20:1_32:3)	HMDB0050305	< LOD	< LOD	< LOD	< LOD	< LOD	< LOD	< LOD	0.0296637	< LOD	< LOD	< LOD	< LOD	< LOD	< LOD	< LOD	< LOD	< LOD	< LOD	< LOD	< LOD	< LOD	< LOD	< LOD	< LOD	< LOD	< LOD	< LOD	< LOD	< LOD	< LOD	< LOD	< LOD	< LOD	< LOD	< LOD	< LOD	< LOD	< LOD	< LOD	< LOD	< LOD	< LOD	< LOD	< LOD	< LOD	< LOD	< LOD	< LOD
TG(20:1_34:0)	HMDB0050356	< LOD	< LOD	< LOD	< LOD	< LOD	< LOD	< LOD	0.0279366	< LOD	< LOD	< LOD	< LOD	< LOD	< LOD	< LOD	< LOD	< LOD	< LOD	< LOD	< LOD	< LOD	< LOD	< LOD	< LOD	< LOD	< LOD	< LOD	< LOD	< LOD	< LOD	< LOD	< LOD	< LOD	< LOD	< LOD	< LOD	< LOD	0.054244	< LOD	< LOD	< LOD	< LOD	< LOD	< LOD	< LOD	< LOD	< LOD	< LOD
TG(20:1_34:1)	HMDB0050470	< LOD	< LOD	< LOD	< LOD	< LOD	< LOD	< LOD	0.0408821	< LOD	< LOD	< LOD	< LOD	< LOD	< LOD	< LOD	< LOD	< LOD	< LOD	0.0413661	< LOD	< LOD	< LOD	< LOD	< LOD	< LOD	< LOD	< LOD	< LOD	< LOD	< LOD	< LOD	< LOD	< LOD	< LOD	< LOD	< LOD	< LOD	0.94198	< LOD	< LOD	< LOD	0.115216	< LOD	< LOD	< LOD	< LOD	< LOD	< LOD
TG(20:1_34:2)	HMDB0050342	< LOD	< LOD	< LOD	< LOD	< LOD	< LOD	< LOD	0.0149228	< LOD	< LOD	< LOD	< LOD	< LOD	0.0226749	< LOD	< LOD	< LOD	< LOD	0.0149441	< LOD	< LOD	< LOD	< LOD	< LOD	< LOD	< LOD	< LOD	< LOD	< LOD	< LOD	< LOD	< LOD	< LOD	< LOD	< LOD	< LOD	< LOD	0.323869	< LOD	0.0188964	0.0170416	0.0376312	< LOD	< LOD	< LOD	< LOD	0.0154289	< LOD
TG(20:1_34:3)	HMDB0050343	< LOD	< LOD	< LOD	< LOD	< LOD	< LOD	< LOD	0.0641301	< LOD	< LOD	< LOD	< LOD	< LOD	< LOD	< LOD	< LOD	< LOD	< LOD	< LOD	< LOD	< LOD	< LOD	< LOD	< LOD	< LOD	< LOD	< LOD	< LOD	< LOD	< LOD	< LOD	< LOD	< LOD	< LOD	< LOD	< LOD	< LOD	< LOD	< LOD	< LOD	< LOD	< LOD	< LOD	< LOD	< LOD	< LOD	< LOD	< LOD
TG(20:2_32:0)	HMDB0053276	< LOD	< LOD	< LOD	< LOD	< LOD	< LOD	< LOD	0.11161	< LOD	< LOD	< LOD	< LOD	< LOD	< LOD	< LOD	< LOD	< LOD	< LOD	< LOD	< LOD	< LOD	< LOD	< LOD	< LOD	< LOD	< LOD	< LOD	< LOD	< LOD	< LOD	< LOD	< LOD	< LOD	< LOD	< LOD	< LOD	< LOD	0.560076	< LOD	< LOD	< LOD	< LOD	< LOD	< LOD	< LOD	< LOD	< LOD	< LOD
TG(20:2_32:1)	HMDB0053367	< LOD	< LOD	< LOD	< LOD	< LOD	< LOD	< LOD	0.0840701	< LOD	< LOD	< LOD	< LOD	< LOD	< LOD	< LOD	< LOD	< LOD	< LOD	< LOD	< LOD	< LOD	< LOD	< LOD	< LOD	< LOD	< LOD	< LOD	< LOD	< LOD	< LOD	< LOD	< LOD	< LOD	< LOD	< LOD	< LOD	< LOD	0.639075	< LOD	< LOD	< LOD	< LOD	< LOD	< LOD	< LOD	< LOD	< LOD	< LOD
TG(20:2_34:1)	HMDB0053380	< LOD	< LOD	< LOD	< LOD	< LOD	< LOD	< LOD	0.0431692	< LOD	< LOD	< LOD	< LOD	< LOD	< LOD	< LOD	< LOD	< LOD	< LOD	< LOD	< LOD	< LOD	< LOD	< LOD	< LOD	< LOD	< LOD	< LOD	< LOD	< LOD	< LOD	< LOD	< LOD	< LOD	< LOD	< LOD	< LOD	< LOD	1.55537	< LOD	0.060945	< LOD	0.110941	< LOD	< LOD	< LOD	< LOD	< LOD	< LOD
TG(20:2_34:2)	N/A	< LOD	< LOD	< LOD	< LOD	< LOD	< LOD	< LOD	0.0864978	< LOD	< LOD	< LOD	< LOD	< LOD	< LOD	< LOD	< LOD	< LOD	< LOD	< LOD	< LOD	< LOD	< LOD	< LOD	< LOD	< LOD	< LOD	< LOD	< LOD	< LOD	< LOD	< LOD	< LOD	< LOD	< LOD	< LOD	< LOD	< LOD	0.261445	< LOD	< LOD	< LOD	< LOD	< LOD	< LOD	< LOD	< LOD	< LOD	< LOD
TG(20:2_34:3)	HMDB0053296	< LOD	< LOD	< LOD	< LOD	< LOD	< LOD	< LOD	0.0560533	< LOD	< LOD	< LOD	< LOD	< LOD	< LOD	< LOD	< LOD	< LOD	< LOD	< LOD	< LOD	< LOD	< LOD	< LOD	< LOD	< LOD	< LOD	< LOD	< LOD	< LOD	< LOD	< LOD	< LOD	< LOD	< LOD	< LOD	< LOD	< LOD	0.0617824	< LOD	< LOD	< LOD	< LOD	< LOD	< LOD	< LOD	< LOD	< LOD	< LOD
TG(20:3_32:0)	HMDB0050886	< LOD	< LOD	< LOD	< LOD	< LOD	< LOD	< LOD	0.113475	< LOD	< LOD	< LOD	< LOD	< LOD	< LOD	< LOD	< LOD	< LOD	< LOD	< LOD	< LOD	< LOD	< LOD	< LOD	< LOD	< LOD	< LOD	< LOD	< LOD	< LOD	< LOD	< LOD	< LOD	< LOD	< LOD	< LOD	< LOD	< LOD	1.91453	< LOD	< LOD	< LOD	0.182842	< LOD	< LOD	< LOD	< LOD	< LOD	< LOD
TG(20:3_32:1)	HMDB0051012	< LOD	< LOD	< LOD	< LOD	< LOD	< LOD	< LOD	0.0883546	< LOD	< LOD	< LOD	< LOD	< LOD	< LOD	< LOD	< LOD	< LOD	< LOD	< LOD	< LOD	< LOD	< LOD	< LOD	< LOD	< LOD	< LOD	< LOD	< LOD	< LOD	< LOD	< LOD	< LOD	< LOD	< LOD	< LOD	< LOD	< LOD	2.21918	< LOD	< LOD	< LOD	0.0908615	< LOD	< LOD	< LOD	< LOD	< LOD	< LOD
TG(20:3_32:2)	HMDB0050872	0.801939	0.200571	0.248214	< LOD	0.0964485	< LOD	0.375569	0.0173776	0.158442	0.403348	0.542604	0.341018	< LOD	0.0282339	< LOD	< LOD	< LOD	< LOD	0.159499	< LOD	< LOD	< LOD	< LOD	< LOD	< LOD	< LOD	< LOD	< LOD	< LOD	< LOD	< LOD	< LOD	< LOD	< LOD	< LOD	< LOD	< LOD	0.716388	< LOD	< LOD	< LOD	0.0529428	< LOD	< LOD	< LOD	0.0656454	< LOD	< LOD
TG(20:3_34:0)	HMDB0050922	< LOD	< LOD	< LOD	< LOD	< LOD	< LOD	< LOD	0.0330462	< LOD	< LOD	< LOD	< LOD	< LOD	< LOD	< LOD	< LOD	< LOD	< LOD	< LOD	< LOD	< LOD	< LOD	< LOD	< LOD	< LOD	< LOD	< LOD	< LOD	< LOD	< LOD	< LOD	< LOD	< LOD	< LOD	< LOD	< LOD	< LOD	0.54613	< LOD	< LOD	< LOD	0.0499526	< LOD	< LOD	< LOD	< LOD	< LOD	< LOD
TG(20:3_34:1)	HMDB0051030	< LOD	< LOD	< LOD	< LOD	< LOD	< LOD	< LOD	0.0706979	< LOD	< LOD	< LOD	< LOD	< LOD	< LOD	< LOD	< LOD	< LOD	< LOD	< LOD	< LOD	< LOD	< LOD	< LOD	< LOD	< LOD	< LOD	< LOD	< LOD	< LOD	< LOD	< LOD	< LOD	< LOD	< LOD	< LOD	< LOD	0.0827941	3.59297	0.0922903	0.181039	0.166913	0.34563	0.123123	< LOD	0.0746367	0.0827653	0.100266	0.128358
TG(20:3_34:2)	HMDB0050908	< LOD	< LOD	< LOD	< LOD	< LOD	< LOD	< LOD	0.0446654	< LOD	< LOD	< LOD	< LOD	< LOD	< LOD	< LOD	< LOD	< LOD	< LOD	< LOD	< LOD	< LOD	< LOD	< LOD	< LOD	< LOD	< LOD	< LOD	< LOD	< LOD	< LOD	< LOD	< LOD	< LOD	< LOD	< LOD	< LOD	< LOD	1.40835	0.0602448	0.131405	0.0871645	0.112205	0.060422	< LOD	< LOD	0.0512021	0.0604703	0.0634632
TG(20:3_34:3)	HMDB0050909	< LOD	< LOD	< LOD	< LOD	< LOD	< LOD	< LOD	0.0262146	< LOD	< LOD	< LOD	< LOD	< LOD	< LOD	< LOD	< LOD	< LOD	< LOD	< LOD	< LOD	< LOD	< LOD	< LOD	< LOD	< LOD	< LOD	< LOD	< LOD	< LOD	< LOD	< LOD	< LOD	< LOD	< LOD	< LOD	< LOD	< LOD	0.129658	< LOD	< LOD	< LOD	< LOD	< LOD	< LOD	< LOD	< LOD	< LOD	< LOD
TG(20:3_36:3)	HMDB0050905	< LOD	< LOD	< LOD	< LOD	< LOD	< LOD	< LOD	0.0310327	< LOD	< LOD	< LOD	< LOD	< LOD	< LOD	< LOD	< LOD	< LOD	< LOD	< LOD	< LOD	< LOD	< LOD	< LOD	< LOD	< LOD	< LOD	< LOD	< LOD	< LOD	< LOD	< LOD	< LOD	< LOD	< LOD	< LOD	< LOD	< LOD	0.358733	< LOD	0.0673255	0.0474314	< LOD	0.0533072	0.0364538	< LOD	< LOD	< LOD	0.043059
TG(20:3_36:4)	HMDB0050912	< LOD	< LOD	< LOD	< LOD	< LOD	< LOD	< LOD	0.0128176	< LOD	< LOD	< LOD	< LOD	< LOD	< LOD	< LOD	< LOD	< LOD	< LOD	< LOD	< LOD	< LOD	< LOD	< LOD	< LOD	< LOD	< LOD	< LOD	< LOD	< LOD	< LOD	< LOD	< LOD	< LOD	< LOD	< LOD	< LOD	< LOD	0.0786927	< LOD	0.0358692	< LOD	< LOD	0.0165672	0.0146551	< LOD	< LOD	< LOD	0.0152486
TG(20:4_30:0)	N/A	< LOD	< LOD	< LOD	< LOD	< LOD	< LOD	0.0187807	0.0101762	< LOD	< LOD	< LOD	< LOD	< LOD	< LOD	< LOD	< LOD	< LOD	< LOD	< LOD	< LOD	< LOD	< LOD	< LOD	< LOD	< LOD	< LOD	< LOD	< LOD	< LOD	< LOD	< LOD	< LOD	< LOD	< LOD	< LOD	< LOD	< LOD	1.33354	< LOD	< LOD	< LOD	0.155993	< LOD	< LOD	0.0230493	< LOD	< LOD	< LOD
TG(20:4_32:0)	HMDB0054022	< LOD	< LOD	< LOD	< LOD	< LOD	< LOD	< LOD	0.0347059	< LOD	< LOD	< LOD	< LOD	< LOD	< LOD	< LOD	< LOD	< LOD	< LOD	< LOD	< LOD	< LOD	< LOD	< LOD	< LOD	< LOD	< LOD	< LOD	< LOD	< LOD	< LOD	< LOD	< LOD	< LOD	< LOD	< LOD	< LOD	< LOD	3.64914	< LOD	0.0719848	< LOD	0.485652	< LOD	< LOD	0.0571838	< LOD	< LOD	< LOD
TG(20:4_32:1)	HMDB0054099	< LOD	< LOD	< LOD	< LOD	< LOD	< LOD	< LOD	0.065185	< LOD	< LOD	< LOD	< LOD	< LOD	< LOD	< LOD	< LOD	< LOD	< LOD	< LOD	< LOD	< LOD	< LOD	< LOD	< LOD	< LOD	< LOD	< LOD	< LOD	< LOD	< LOD	< LOD	< LOD	< LOD	< LOD	< LOD	< LOD	< LOD	3.2713	< LOD	0.101809	< LOD	0.270385	< LOD	< LOD	0.0696669	< LOD	< LOD	< LOD
TG(20:4_32:2)	N/A	0.406933	0.0712206	0.106854	< LOD	0.111528	0.0353382	0.354074	0.0124231	0.0884172	0.223172	0.274887	0.119019	0.0454101	0.0220369	0.0389858	0.0230292	< LOD	< LOD	0.121352	0.013391	< LOD	< LOD	< LOD	0.0154975	0.0304898	0.0166549	0.013804	0.0186821	< LOD	< LOD	0.0323419	0.0190244	0.0305365	0.0220583	0.0191031	0.0235101	< LOD	1.02273	0.0150275	0.0480688	< LOD	0.0884594	< LOD	0.0232358	0.0237453	< LOD	0.0188406	0.0488973
TG(20:4_34:0)	HMDB0054044	< LOD	< LOD	< LOD	< LOD	< LOD	< LOD	< LOD	0.0352691	< LOD	< LOD	< LOD	< LOD	< LOD	< LOD	< LOD	< LOD	< LOD	< LOD	< LOD	< LOD	< LOD	< LOD	< LOD	< LOD	< LOD	< LOD	< LOD	< LOD	< LOD	< LOD	< LOD	< LOD	< LOD	< LOD	< LOD	< LOD	< LOD	1.18465	< LOD	0.0356096	< LOD	0.156931	< LOD	< LOD	< LOD	< LOD	< LOD	< LOD
TG(20:4_34:1)	HMDB0054110	< LOD	< LOD	< LOD	< LOD	< LOD	< LOD	< LOD	0.0302895	< LOD	< LOD	< LOD	< LOD	< LOD	< LOD	< LOD	< LOD	< LOD	0.101082	< LOD	< LOD	< LOD	< LOD	< LOD	< LOD	< LOD	0.0386642	< LOD	< LOD	< LOD	< LOD	< LOD	< LOD	< LOD	< LOD	< LOD	< LOD	0.138349	6.74169	0.214805	0.392606	0.221126	1.00395	0.168526	0.152577	0.201701	0.134081	0.15445	0.195279
TG(20:4_34:2)	N/A	< LOD	< LOD	< LOD	< LOD	< LOD	< LOD	< LOD	0.0707445	< LOD	< LOD	< LOD	< LOD	< LOD	< LOD	< LOD	< LOD	< LOD	< LOD	< LOD	< LOD	< LOD	< LOD	< LOD	< LOD	< LOD	< LOD	< LOD	< LOD	< LOD	< LOD	< LOD	< LOD	< LOD	< LOD	< LOD	< LOD	0.0790239	2.29061	0.135824	0.24872	0.101537	0.332357	< LOD	0.105875	0.121208	< LOD	< LOD	0.12737
TG(20:4_34:3)	HMDB0010519	< LOD	< LOD	< LOD	< LOD	< LOD	< LOD	< LOD	0.0598191	< LOD	< LOD	< LOD	< LOD	< LOD	< LOD	< LOD	< LOD	< LOD	< LOD	< LOD	< LOD	< LOD	< LOD	< LOD	< LOD	< LOD	< LOD	< LOD	< LOD	< LOD	< LOD	< LOD	< LOD	< LOD	< LOD	< LOD	< LOD	< LOD	0.187429	< LOD	< LOD	< LOD	< LOD	< LOD	< LOD	< LOD	< LOD	< LOD	< LOD
TG(20:4_36:2)	HMDB0054187	< LOD	< LOD	< LOD	< LOD	< LOD	< LOD	< LOD	0.022311	< LOD	< LOD	< LOD	< LOD	< LOD	< LOD	< LOD	< LOD	< LOD	< LOD	< LOD	< LOD	< LOD	< LOD	< LOD	< LOD	< LOD	< LOD	< LOD	< LOD	< LOD	< LOD	< LOD	< LOD	< LOD	< LOD	< LOD	< LOD	0.0915617	1.79779	0.133397	0.270239	0.173473	0.304937	0.117238	0.0991564	0.0917393	0.101498	0.0942856	0.175263
TG(20:4_36:3)	HMDB0010521	< LOD	< LOD	< LOD	< LOD	< LOD	< LOD	< LOD	0.0657942	< LOD	< LOD	< LOD	< LOD	< LOD	< LOD	< LOD	< LOD	< LOD	< LOD	< LOD	< LOD	< LOD	< LOD	< LOD	< LOD	< LOD	< LOD	< LOD	< LOD	< LOD	< LOD	< LOD	< LOD	< LOD	< LOD	< LOD	< LOD	< LOD	0.609956	0.0714917	0.212619	0.0734946	0.104068	0.0813717	0.0831943	< LOD	< LOD	< LOD	< LOD
TG(20:4_36:4)	HMDB0054050	< LOD	< LOD	< LOD	< LOD	< LOD	< LOD	< LOD	0.0128395	< LOD	< LOD	< LOD	< LOD	< LOD	< LOD	< LOD	< LOD	< LOD	< LOD	< LOD	< LOD	< LOD	< LOD	< LOD	< LOD	< LOD	< LOD	< LOD	< LOD	< LOD	< LOD	< LOD	< LOD	< LOD	< LOD	< LOD	< LOD	0.0129224	0.250382	0.0165792	0.0627673	0.0147668	0.0475776	0.0207614	0.0315835	0.0197985	< LOD	< LOD	0.0173292
TG(20:5_34:0)	HMDB0055696	< LOD	< LOD	< LOD	< LOD	< LOD	< LOD	< LOD	0.0713363	< LOD	< LOD	< LOD	< LOD	< LOD	< LOD	< LOD	< LOD	< LOD	< LOD	< LOD	< LOD	< LOD	< LOD	< LOD	< LOD	< LOD	< LOD	< LOD	< LOD	< LOD	< LOD	< LOD	< LOD	< LOD	< LOD	< LOD	< LOD	< LOD	0.179568	< LOD	< LOD	< LOD	< LOD	< LOD	< LOD	< LOD	< LOD	< LOD	< LOD
TG(20:5_34:1)	HMDB0055720	< LOD	< LOD	< LOD	< LOD	< LOD	< LOD	< LOD	0.0783523	< LOD	< LOD	< LOD	< LOD	< LOD	< LOD	< LOD	< LOD	< LOD	< LOD	< LOD	< LOD	< LOD	< LOD	< LOD	< LOD	< LOD	< LOD	< LOD	< LOD	< LOD	< LOD	< LOD	< LOD	< LOD	< LOD	< LOD	< LOD	< LOD	1.26895	< LOD	< LOD	< LOD	0.369333	< LOD	< LOD	< LOD	< LOD	< LOD	< LOD
TG(20:5_34:2)	N/A	< LOD	< LOD	< LOD	< LOD	< LOD	< LOD	< LOD	0.0247777	< LOD	< LOD	< LOD	< LOD	< LOD	< LOD	< LOD	< LOD	< LOD	< LOD	< LOD	< LOD	< LOD	< LOD	< LOD	< LOD	< LOD	< LOD	< LOD	< LOD	< LOD	< LOD	< LOD	< LOD	< LOD	< LOD	< LOD	< LOD	< LOD	0.46293	< LOD	0.0441314	< LOD	0.115993	< LOD	0.0520864	< LOD	< LOD	< LOD	< LOD
TG(20:5_36:2)	HMDB0055748	< LOD	< LOD	< LOD	< LOD	< LOD	< LOD	< LOD	0.0286112	< LOD	< LOD	< LOD	< LOD	< LOD	< LOD	< LOD	< LOD	< LOD	< LOD	< LOD	< LOD	< LOD	< LOD	< LOD	< LOD	< LOD	< LOD	< LOD	< LOD	< LOD	< LOD	< LOD	< LOD	< LOD	< LOD	< LOD	< LOD	< LOD	0.24774	< LOD	< LOD	0.0359355	0.121144	< LOD	0.0605275	< LOD	< LOD	< LOD	< LOD
TG(20:5_36:3)	HMDB0055752	< LOD	< LOD	< LOD	< LOD	< LOD	< LOD	< LOD	0.0300968	< LOD	< LOD	< LOD	< LOD	< LOD	< LOD	< LOD	< LOD	< LOD	< LOD	< LOD	< LOD	< LOD	< LOD	< LOD	< LOD	< LOD	< LOD	< LOD	< LOD	< LOD	< LOD	< LOD	< LOD	< LOD	< LOD	< LOD	< LOD	< LOD	0.105921	< LOD	< LOD	< LOD	0.0510439	< LOD	0.0624648	< LOD	< LOD	< LOD	< LOD
TG(22:4_34:2)	N/A	< LOD	< LOD	< LOD	< LOD	< LOD	< LOD	< LOD	0.039105	< LOD	< LOD	< LOD	< LOD	< LOD	< LOD	< LOD	< LOD	< LOD	< LOD	< LOD	< LOD	< LOD	< LOD	< LOD	< LOD	< LOD	< LOD	< LOD	< LOD	< LOD	< LOD	< LOD	< LOD	< LOD	< LOD	< LOD	< LOD	< LOD	0.0812581	< LOD	< LOD	< LOD	< LOD	< LOD	< LOD	< LOD	< LOD	< LOD	< LOD
TG(22:5_32:0)	HMDB0054916	< LOD	< LOD	< LOD	< LOD	< LOD	< LOD	< LOD	0.0216565	< LOD	< LOD	< LOD	< LOD	< LOD	< LOD	< LOD	< LOD	< LOD	< LOD	< LOD	< LOD	< LOD	< LOD	< LOD	< LOD	< LOD	< LOD	< LOD	< LOD	< LOD	< LOD	< LOD	< LOD	< LOD	< LOD	< LOD	< LOD	< LOD	0.325801	< LOD	< LOD	< LOD	0.0534354	< LOD	< LOD	< LOD	< LOD	< LOD	< LOD
TG(22:5_32:1)	HMDB0054972	< LOD	< LOD	< LOD	< LOD	< LOD	< LOD	< LOD	0.106212	< LOD	< LOD	< LOD	< LOD	< LOD	< LOD	< LOD	< LOD	< LOD	< LOD	< LOD	< LOD	< LOD	< LOD	< LOD	< LOD	< LOD	< LOD	< LOD	< LOD	< LOD	< LOD	< LOD	< LOD	< LOD	< LOD	< LOD	< LOD	< LOD	0.318506	< LOD	< LOD	< LOD	< LOD	< LOD	< LOD	< LOD	< LOD	< LOD	< LOD
TG(22:5_34:1)	HMDB0054980	< LOD	< LOD	< LOD	< LOD	< LOD	< LOD	< LOD	0.0314279	< LOD	< LOD	< LOD	< LOD	< LOD	< LOD	< LOD	< LOD	< LOD	< LOD	< LOD	< LOD	< LOD	< LOD	< LOD	< LOD	< LOD	< LOD	< LOD	< LOD	< LOD	< LOD	< LOD	< LOD	< LOD	< LOD	< LOD	< LOD	0.0424243	0.972491	0.074224	0.0942478	0.086852	0.235871	0.0329569	0.0463499	< LOD	0.0649399	0.0400917	0.0386298
TG(22:5_34:2)	N/A	< LOD	< LOD	< LOD	< LOD	< LOD	< LOD	< LOD	0.0607993	< LOD	< LOD	< LOD	< LOD	< LOD	< LOD	< LOD	< LOD	< LOD	< LOD	< LOD	< LOD	< LOD	< LOD	< LOD	< LOD	< LOD	< LOD	< LOD	< LOD	< LOD	< LOD	< LOD	< LOD	< LOD	< LOD	< LOD	< LOD	< LOD	0.266802	< LOD	< LOD	< LOD	0.0654296	< LOD	< LOD	< LOD	< LOD	< LOD	< LOD
TG(22:6_32:0)	HMDB0055894	< LOD	< LOD	< LOD	< LOD	< LOD	< LOD	< LOD	0.0626146	< LOD	< LOD	< LOD	< LOD	< LOD	< LOD	< LOD	< LOD	< LOD	< LOD	< LOD	< LOD	< LOD	< LOD	< LOD	< LOD	< LOD	< LOD	< LOD	< LOD	< LOD	< LOD	< LOD	< LOD	< LOD	< LOD	< LOD	< LOD	< LOD	0.71362	< LOD	< LOD	< LOD	0.151635	< LOD	< LOD	< LOD	< LOD	< LOD	< LOD
TG(22:6_32:1)	HMDB0055908	< LOD	< LOD	< LOD	< LOD	< LOD	< LOD	0.0352912	0.0230038	< LOD	< LOD	< LOD	< LOD	< LOD	< LOD	< LOD	< LOD	< LOD	< LOD	< LOD	< LOD	< LOD	< LOD	< LOD	< LOD	< LOD	< LOD	< LOD	< LOD	< LOD	< LOD	< LOD	< LOD	< LOD	< LOD	< LOD	< LOD	< LOD	0.608079	0.0346708	< LOD	0.0388184	0.111283	< LOD	0.030547	< LOD	0.0282804	0.0249145	< LOD
TG(22:6_34:1)	HMDB0055910	< LOD	< LOD	< LOD	< LOD	< LOD	< LOD	< LOD	0.0244973	< LOD	< LOD	< LOD	< LOD	< LOD	< LOD	< LOD	< LOD	< LOD	< LOD	0.0247664	< LOD	< LOD	< LOD	< LOD	< LOD	< LOD	< LOD	< LOD	< LOD	< LOD	< LOD	< LOD	< LOD	< LOD	< LOD	0.0420125	< LOD	0.105779	1.60175	0.185394	0.0701313	0.15871	0.389559	0.0323694	0.168126	0.03308	0.174005	0.0925879	0.0278435
TG(22:6_34:2)	N/A	< LOD	< LOD	< LOD	< LOD	< LOD	< LOD	< LOD	0.0144159	< LOD	< LOD	< LOD	< LOD	< LOD	< LOD	< LOD	< LOD	< LOD	< LOD	< LOD	< LOD	< LOD	< LOD	< LOD	< LOD	< LOD	< LOD	< LOD	< LOD	< LOD	< LOD	< LOD	< LOD	< LOD	< LOD	0.0334192	< LOD	0.0538049	0.484806	0.0996131	0.0471722	0.108022	0.14433	< LOD	0.139397	< LOD	0.101499	0.0457765	< LOD
[truncated: 34 more columns]

## Sheet: Panel B_opt.
		Theoretical Concentration (µM)			Calculated Concentration (µM)				Accuracy (%)					ID#120211	ID#120212	ID#120213	ID#120214	ID#120215	ID#120216	ID#120217	ID#120218	ID#120219	ID#120220	ID#120221	ID#120222	ID#120223	ID#120224	ID#120225	ID#120226	ID#120227	ID#120228	ID#120229	ID#120230	ID#120231	ID#120232	ID#120233	ID#120234	ID#120235	ID#120236	ID#120237	ID#120238	ID#120239	ID#120240	ID#120241	ID#120242	ID#120243	ID#120244	ID#120245	ID#120246
Measure Name	HMBD ID	QC-1	QC-2	QC-3	QC-1[1]	QC-2[1]	QC-3[1]	QC-2[1]-QC Level 2	QC-1[1]	QC-2[1]	QC-3[1]	QC-2[1]-QC Level 2	LOD	Exp_DBS_0_1	Exp_DBS_1A_1	Exp_DBS_1B_1	Exp_DBS_1C_1	Exp_DBS_2A_1	Exp_DBS_2B_1	Exp_DBS_2C_1	Exp_DBS_3A_1	Exp_DBS_3B_1	Exp_DBS_3C_1	Exp_DBS_4A_1	Exp_DBS_4B_1	Exp_DBS_4C_1	Exp_DBS_5A_1	Exp_DBS_5B_1	Exp_DBS_5C_1	Exp_DBS_6A_1	Exp_DBS_6B_1	Exp_DBS_6C_1	Exp_DBS_7A_1	Exp_DBS_7B_1	Exp_DBS_7C_1	Exp_DBS_8A_1	Exp_DBS_8B_1	Exp_DBS_8C_1	Exp_DBS_9A_1	Exp_DBS_9B_1	Exp_DBS_9C_1	Exp_DBS_10A_1	Exp_DBS_10B_1	Exp_DBS_10C_1	Exp_DBS_11A_1	Exp_DBS_11B_1	Exp_DBS_11C_1	Exp_DBS_12A_1	Exp_DBS_12B_1
2,5-Furandicarboxylic acid	HMDB0004812	0.8	3.2	6.4	0.904416	5.12867	5.53339	3.61684	113.052	160.271	86.4592	113.026	3.28828e-05	< LOD	0.0297868	0.034665	0.0458586	0.117864	0.0279706	0.0433494	0.0625625	0.0506188	0.0486334	0.0421177	0.0537819	0.116419	0.0574444	0.0533031	0.0685865	0.0702328	0.0575811	0.112698	0.109524	0.0917877	0.117658	0.0617246	0.0379012	0.0326951	0.0426381	0.0950537	0.0815886	0.0914357	0.0695134	0.0991184	0.0695903	0.126173	0.0922156	0.0447823	0.0511921
2-Hydroxy-2-methylbutyric acid	HMDB0001987	0.875	3.5	7	0.904365	4.70018	5.72979	3.53786	103.356	134.291	81.8542	101.082	0.07467	0.160227	0.0985429	0.168697	0.197229	0.244617	0.085305	< LOD	< LOD	< LOD	< LOD	< LOD	< LOD	0.156247	< LOD	< LOD	< LOD	0.0822958	0.0750435	< LOD	< LOD	0.086632	< LOD	< LOD	< LOD	< LOD	< LOD	0.10874	< LOD	0.0897356	< LOD	< LOD	0.0778015	0.110448	< LOD	< LOD	< LOD
2-Hydroxy-3-methylvaleric acid	HMDB0000317	0.875	3.5	7	1.00136	4.82136	5.93461	4.11634	114.441	137.753	84.7802	117.61	0.536937	< LOD	< LOD	< LOD	< LOD	< LOD	< LOD	< LOD	< LOD	< LOD	0.559283	< LOD	< LOD	0.662514	< LOD	< LOD	< LOD	< LOD	< LOD	< LOD	< LOD	< LOD	< LOD	< LOD	< LOD	< LOD	< LOD	< LOD	< LOD	< LOD	< LOD	< LOD	< LOD	< LOD	< LOD	< LOD	< LOD
2-Hydroxybutyric acid	HMDB0000008	14	56	112	14.7498	79.6756	100.347	60.2631	105.356	142.278	89.5954	107.613	0.331075	< LOD	2.71454	2.65144	3.80573	5.20064	2.93863	4.00561	2.7109	2.16651	1.46581	2.01812	1.87853	3.10561	2.35714	2.59311	2.82044	3.446	3.19751	6.30022	2.74734	2.31781	3.43992	2.07984	1.85513	1.88199	1.67911	3.03455	2.72	3.45752	2.02767	3.23481	2.78674	3.12155	2.72491	2.17951	2.08796
2-hydroxyglutaric acid	HMDB0059655	0.5625	2.25	4.5	0.740415	3.03575	3.54442	2.33872	131.629	134.922	78.765	103.943	0.00492507	0.232592	0.330319	0.23363	0.668093	1.07904	0.460427	0.9153	0.452228	0.80561	0.589313	0.618239	0.504982	0.698272	0.701734	0.864344	0.676139	1.32397	0.864736	1.52851	0.587009	0.741784	0.876421	0.592174	0.366558	0.491495	0.497274	0.818668	0.694078	0.867309	0.674567	1.26274	0.852903	0.965549	0.702441	0.476885	0.465955
2-Hydroxyisobutyric acid	HMDB0000729	0.875	3.5	7	0.822323	4.75232	6.32137	3.27039	93.9798	135.781	90.3052	93.4398	0.00185063	0.121096	0.15114	0.169819	0.332459	0.468537	0.206695	0.221975	0.0828271	0.154423	0.101054	0.0687833	0.108266	0.251954	0.104917	0.151298	0.137093	0.18969	0.181032	0.310094	0.220723	0.237417	0.313821	0.11693	0.0936655	0.123841	0.0896567	0.172613	0.150771	0.169934	0.114827	0.209281	0.0943096	0.205768	0.12961	0.0806905	0.0792694
2-Hydroxyisovaleric acid	HMDB0000407	3.5	14	28	4.51212	17.6248	22.2169	17.2984	128.918	125.892	79.346	123.56	0.120783	< LOD	1.69712	1.32318	2.43315	3.41877	1.77042	2.29014	1.19573	1.40294	0.984355	1.05706	1.14406	2.0172	1.34638	1.44432	1.57014	2.23182	1.80356	3.70901	1.56535	1.55597	2.11142	1.40512	0.927725	1.26551	1.09464	1.66011	1.58183	1.79149	1.41003	2.05095	1.32238	2.07491	1.68888	1.28404	1.21752
2-Hydroxyphenylacetic acid	HMDB0000669	0.625	2.5	5	0.948328	2.67054	3.21412	2.72115	151.732	106.822	64.2825	108.846	9.76111e-07	< LOD	< LOD	< LOD	< LOD	< LOD	< LOD	< LOD	< LOD	< LOD	< LOD	< LOD	< LOD	< LOD	< LOD	< LOD	< LOD	< LOD	< LOD	< LOD	< LOD	< LOD	< LOD	< LOD	< LOD	< LOD	< LOD	< LOD	< LOD	< LOD	< LOD	< LOD	< LOD	< LOD	< LOD	< LOD	< LOD
2-Oxoadipic acid	HMDB0000225	8.75	35	70	< LOD	< LOD	75.31	< LOD	74.2699	125.091	107.586	101.23	62.7616	< LOD	< LOD	< LOD	< LOD	< LOD	< LOD	< LOD	< LOD	< LOD	< LOD	< LOD	< LOD	< LOD	< LOD	< LOD	< LOD	< LOD	< LOD	< LOD	< LOD	< LOD	< LOD	< LOD	< LOD	< LOD	< LOD	< LOD	< LOD	< LOD	< LOD	< LOD	< LOD	< LOD	< LOD	< LOD	< LOD
2-Oxoisocaproic acid	HMDB0000695	22.4	89.6	179.2	25.5612	170.197	167.693	108.706	114.113	189.952	93.5789	121.323	0.0114106	< LOD	7.26142	6.70581	11.869	18.9757	5.60454	5.53737	3.18471	3.86529	1.28767	2.42807	2.85538	5.79646	1.88313	2.84981	3.40421	6.28875	3.18965	21.0668	6.77676	3.46092	9.87885	3.13438	0.221563	2.01549	1.81307	6.03749	3.07145	5.92866	1.96654	5.64353	2.53892	6.60486	2.79332	2.89422	1.43912
3,4-Dihydroxybutyric acid	HMDB0000337	7	28	56	47.3193	< LOD	72.1024	64.4418	675.99	-212.762	128.754	230.149	5.09079e-07	131.412	131.412	131.412	131.412	131.412	131.412	131.412	131.412	131.412	131.412	131.412	131.412	131.412	131.412	131.412	131.412	131.412	131.412	131.412	131.412	131.412	131.412	131.412	131.412	131.412	131.412	131.412	131.412	131.412	131.412	131.412	131.412	131.412	131.412	25.2413	131.412
3-(3-Hydroxyphenyl)-3-hydroxypropanoic acid	HMDB0002643	0.25	1	2	0.235012	1.31058	1.65229	1.09919	94.0047	131.058	82.6143	109.919	8.00693e-05	0.00507554	0.00967295	0.0137621	0.0230564	0.0203839	0.0125343	0.0129088	0.0116592	0.00852235	0.007119	0.00442762	0.00828291	0.0180942	0.0107372	0.0106319	0.00930738	0.0143238	0.011734	0.0183742	0.0119986	0.00903313	0.0152486	0.00766536	0.00593833	0.0123109	0.00915451	0.00890273	0.00966199	0.0123242	0.00696312	0.0139145	0.00997765	0.0178161	0.0111378	0.00861518	0.00942003
3-Aminoisobutyric acid	HMDB0003911	7	28	56	4.74566	28.1006	47.6362	27.6945	67.7952	100.359	85.0646	98.9088	3.71364e-06	0.204033	0.1856	0.286532	0.269062	0.739713	0.238388	0.218175	0.215909	< LOD	< LOD	0.311423	0.321253	0.314754	0.298041	0.179032	0.430789	0.266156	0.211363	0.515424	0.184976	0.280383	0.179846	0.182834	0.201164	0.208223	0.25566	0.275398	0.345527	0.205176	0.393123	0.445814	0.17047	0.220698	0.420021	0.208825	0.189405
3-Carboxy-4-methyl-5-propyl-2-furanpropionic acid	HMDB0061112	8.75	35	70	8.89887	61.8427	59.5677	39.4991	101.701	176.693	85.0966	112.855	0.0048619	< LOD	< LOD	< LOD	< LOD	< LOD	< LOD	< LOD	< LOD	< LOD	< LOD	< LOD	< LOD	< LOD	< LOD	< LOD	< LOD	< LOD	< LOD	< LOD	< LOD	< LOD	< LOD	< LOD	< LOD	< LOD	< LOD	< LOD	< LOD	< LOD	< LOD	< LOD	< LOD	< LOD	< LOD	< LOD	< LOD
3-Deoxyglucosone	HMDB0245856	0.28125	1.125	2.25	0.232011	1.51699	1.95542	1.29306	82.4927	134.843	86.9078	114.939	0.0130104	< LOD	< LOD	< LOD	0.0141208	0.0554684	< LOD	0.0139093	< LOD	0.0272527	< LOD	< LOD	< LOD	0.0263076	< LOD	< LOD	< LOD	0.0225659	< LOD	0.151956	0.100099	0.0132008	0.0339744	0.03744	< LOD	< LOD	0.0520288	0.0282946	0.029521	0.0230275	0.101381	0.0276487	0.0244634	0.0508107	0.0172506	0.0360601	< LOD
3-Hydroxybutyric acid	HMDB0000011	35	140	280	37.55	192.196	238.977	165.644	107.286	137.283	85.3491	118.317	0.111821	0.326788	3.77394	3.41387	4.9914	8.52073	3.89113	5.41795	3.02305	3.27142	2.22169	2.47516	2.61837	3.76688	3.1089	3.66057	3.58672	5.44363	4.00608	8.03601	3.27891	3.31317	4.93538	2.86223	2.17679	2.76238	2.41403	4.08576	3.23518	4.23051	2.91261	5.01502	3.55339	4.57036	3.48024	2.57721	2.88642
3-Hydroxyisobutyric acid	HMDB0000336	4.375	17.5	35	4.22859	26.0438	31.0925	16.5197	96.6536	148.822	88.8358	94.398	1.07512	< LOD	3.18178	2.55752	3.64447	4.63233	3.71147	4.27643	2.10067	2.67274	1.57809	2.34087	1.98166	3.35366	2.3476	2.87151	3.08282	4.69461	2.93184	6.65875	3.32202	2.83813	5.02654	2.12787	1.92879	1.79226	1.97713	3.58011	3.3601	3.10004	2.29528	4.81308	2.9055	4.30202	2.63157	2.04207	2.0764
3-Hydroxyisovaleric acid	HMDB0000754	3.5	14	28	3.57504	22.3122	25.8986	17.2592	102.144	159.373	92.4949	123.28	2.00866	< LOD	< LOD	< LOD	< LOD	< LOD	< LOD	< LOD	< LOD	< LOD	< LOD	< LOD	< LOD	< LOD	< LOD	< LOD	< LOD	< LOD	< LOD	< LOD	< LOD	< LOD	< LOD	< LOD	< LOD	< LOD	< LOD	< LOD	< LOD	< LOD	< LOD	< LOD	< LOD	< LOD	< LOD	< LOD	< LOD
3-Hydroxyphenylacetic acid	HMDB0000440	0.875	3.5	7	0.997186	4.36269	6.66473	3.23466	113.964	124.648	95.2104	92.4188	0.493031	< LOD	< LOD	< LOD	< LOD	< LOD	< LOD	< LOD	< LOD	< LOD	< LOD	< LOD	< LOD	< LOD	< LOD	< LOD	< LOD	< LOD	< LOD	< LOD	< LOD	< LOD	< LOD	< LOD	< LOD	< LOD	< LOD	< LOD	< LOD	< LOD	< LOD	< LOD	< LOD	< LOD	< LOD	< LOD	< LOD
3-Indoleacetic acid	HMDB0000197	2.1875	8.75	17.5	1.56863	11.3505	12.5436	9.14487	71.7086	129.72	71.6776	104.513	0.00259608	0.10008	0.115321	0.148329	0.134058	0.349055	0.102535	0.0831715	0.156695	0.15632	0.111193	0.124197	0.124356	0.20855	0.171945	0.121448	0.149021	0.147009	0.125227	0.207797	0.176549	0.140029	0.173506	0.111898	0.13124	0.145187	0.142418	0.227599	0.17336	0.186589	0.105805	0.277533	0.190889	0.247759	0.172613	0.235311	0.137894
3-Methyladipic acid	HMDB0000555	0.28125	1.125	2.25	0.34202	1.90779	2.03181	1.37586	121.607	169.581	90.3025	122.299	5.55437e-08	0.141903	0.0475177	0.0707244	0.0808255	0.230003	0.0644579	0.0685262	0.0228948	0.0451351	0.0318792	0.00193913	0.0247643	0.0426647	0.0113055	0.00841616	0.0255135	0.0290282	0.0180428	0.0554612	0.0499697	0.0405957	0.0826009	0.054083	0.0318392	0.0483748	0.0824019	0.0401664	0.0217242	0.063203	0.0223177	0.0320999	0.0372564	0.0523213	0.0114695	0.014841	0.0205118
4-Ethylphenyl sulfate	HMDB0062551	0.8	3.2	6.4	1.00028	5.98474	6.45439	3.95196	125.035	187.023	100.85	123.499	0.0386528	< LOD	< LOD	< LOD	< LOD	0.0473251	< LOD	< LOD	< LOD	< LOD	< LOD	< LOD	< LOD	< LOD	< LOD	< LOD	< LOD	< LOD	< LOD	< LOD	< LOD	< LOD	< LOD	< LOD	< LOD	< LOD	< LOD	< LOD	< LOD	< LOD	< LOD	< LOD	< LOD	< LOD	< LOD	< LOD	< LOD
4-Hydroxybenzoic acid	HMDB0000500	1.09375	4.375	8.75	0.656641	3.47325	6.43682	5.11494	60.0357	79.3886	73.5637	116.913	0.325995	< LOD	< LOD	< LOD	< LOD	< LOD	< LOD	< LOD	< LOD	< LOD	< LOD	< LOD	< LOD	< LOD	< LOD	< LOD	< LOD	< LOD	< LOD	< LOD	< LOD	< LOD	< LOD	< LOD	< LOD	< LOD	< LOD	< LOD	< LOD	0.352425	< LOD	< LOD	< LOD	< LOD	< LOD	< LOD	< LOD
4-Hydroxyphenylacetic acid	HMDB0000020	0.4	1.6	3.2	0.426386	2.79702	2.06077	1.85654	106.597	174.814	64.3991	116.034	0.0395044	< LOD	< LOD	< LOD	< LOD	< LOD	< LOD	< LOD	< LOD	< LOD	< LOD	< LOD	< LOD	< LOD	< LOD	< LOD	< LOD	< LOD	< LOD	0.290186	< LOD	< LOD	0.244315	< LOD	< LOD	< LOD	< LOD	< LOD	< LOD	< LOD	< LOD	0.0692907	< LOD	< LOD	< LOD	< LOD	< LOD
4-Hydroxyphenylpyruvic acid	HMDB0000707	7	28	56	4.40879	34.6056	35.9061	22.4714	62.9827	123.592	64.1181	80.2551	0.0322316	< LOD	< LOD	< LOD	< LOD	0.110004	< LOD	< LOD	< LOD	< LOD	< LOD	< LOD	< LOD	< LOD	< LOD	< LOD	< LOD	< LOD	< LOD	< LOD	< LOD	< LOD	< LOD	< LOD	< LOD	< LOD	< LOD	< LOD	< LOD	< LOD	< LOD	< LOD	< LOD	< LOD	< LOD	< LOD	< LOD
5-Aminolevulinic Acid	HMDB0001149	7	28	56	8.05462	32.6283	56.7396	38.3842	115.066	116.53	101.321	137.087	5.2519	< LOD	< LOD	< LOD	< LOD	< LOD	< LOD	< LOD	< LOD	< LOD	< LOD	< LOD	< LOD	< LOD	< LOD	< LOD	< LOD	< LOD	< LOD	< LOD	< LOD	< LOD	< LOD	< LOD	< LOD	< LOD	< LOD	< LOD	< LOD	< LOD	< LOD	< LOD	< LOD	< LOD	< LOD	< LOD	< LOD
5-Hydroxyindoleacetic acid	HMDB0000763	0.18	0.72	1.44	0.209646	0.888911	1.20444	0.795298	116.47	123.46	83.6414	110.458	1.04509e-06	< LOD	< LOD	< LOD	< LOD	< LOD	< LOD	< LOD	< LOD	< LOD	< LOD	< LOD	< LOD	< LOD	< LOD	< LOD	< LOD	< LOD	< LOD	< LOD	< LOD	< LOD	< LOD	< LOD	< LOD	< LOD	< LOD	< LOD	< LOD	< LOD	< LOD	< LOD	< LOD	< LOD	< LOD	< LOD	< LOD
5-Oxoproline	HMDB0000267	21	84	168	25.2075	118.998	151.249	100.878	120.036	141.664	90.0292	120.093	3.31973	< LOD	35.1659	52.9197	85.0702	114.828	43.3615	63.5562	49.5091	50.6036	35.594	46.6659	42.8302	60.2874	52.0995	59.5023	51.5127	71.6694	65.0314	138.898	79.6485	53.8199	80.566	45.4768	37.7095	50.2032	52.3832	63.5291	58.8646	81.3082	55.8292	93.9956	64.0578	76.093	57.9433	46.3547	44.3405
Acetoacetic acid	HMDB0000060	13.125	52.5	105	11.7693	68.2386	96.2501	66.4026	89.6712	129.978	91.6668	126.481	4.89254	< LOD	< LOD	< LOD	< LOD	7.59898	< LOD	< LOD	< LOD	< LOD	< LOD	< LOD	< LOD	< LOD	< LOD	< LOD	< LOD	< LOD	< LOD	5.72555	< LOD	< LOD	6.00572	< LOD	< LOD	< LOD	< LOD	< LOD	< LOD	< LOD	< LOD	< LOD	< LOD	< LOD	< LOD	< LOD	< LOD
alpha-Ketoglutaric acid	HMDB0000208	3.5	14	28	4.48573	25.2399	26.0814	17.8085	128.164	180.285	93.1477	127.204	0.00357316	< LOD	< LOD	0.640545	1.67106	1.18259	0.0897927	0.285307	0.306461	0.506925	0.082317	< LOD	0.874947	0.963379	0.240798	1.06044	0.577392	0.633766	0.37847	2.4531	1.82499	0.685833	0.781669	0.649351	0.0820325	0.426107	0.884711	0.966469	1.11287	1.70463	1.00794	1.42727	0.717517	1.276	0.264025	0.656298	0.161171
alpha-Ketoisovaleric acid	HMDB0000019	3.15	12.6	25.2	3.17173	19.8569	21.7183	14.6734	100.69	157.595	86.1835	116.455	0.00110188	< LOD	1.94009	1.92779	3.95675	6.07725	1.71824	1.54667	1.35804	1.51219	1.1947	1.39947	1.38266	1.8424	1.13895	1.43788	1.57091	2.70796	1.71542	6.15228	2.2696	1.92506	3.09089	1.28877	0.600045	1.14771	1.29299	2.36816	1.50551	2.17349	1.1566	2.13867	1.40772	2.57216	1.483	1.29217	1.07305
Argininic acid	HMDB0003148	7	28	56	7.43458	43.5793	48.1325	35.74	106.208	155.64	85.9508	127.643	0.0335929	1.48151	2.76833	4.87016	7.05054	2.8566	3.51654	1.35361	2.59509	5.68585	0.265695	1.27928	4.04323	6.5212	1.61316	6.68521	3.61909	6.58289	0.525389	17.6978	11.6871	0.720056	26.9999	7.24462	4.60705	5.99709	6.35939	9.72344	9.03053	14.1191	8.31433	11.328	8.6875	20.2059	9.41734	10.5092	7.49879
Benzoic acid	HMDB0001870	0.875	3.5	7	0.831383	5.23768	6.35587	3.28124	95.0152	149.648	90.7981	93.7498	0.00534264	0.58649	0.862778	0.911516	1.52666	1.62763	1.36254	2.18555	1.04346	1.41905	1.02906	1.03657	0.404018	0.951718	0.711514	0.510542	0.510936	1.58256	1.07841	2.94115	0.521444	0.649294	1.35479	0.618859	0.629543	0.426614	0.526421	0.906305	1.17017	0.638643	0.784806	0.962073	0.775173	1.37638	0.864556	0.602223	0.780735
Butyric acid + Isobutyric acid	HMDB0000039 HMDB0001873	1.575	6.3	12.6	< LOD	< LOD	< LOD	< LOD	182.725	123.94	66.4587	156.814	21.9872	< LOD	< LOD	< LOD	< LOD	< LOD	< LOD	< LOD	< LOD	< LOD	< LOD	< LOD	< LOD	< LOD	< LOD	< LOD	< LOD	< LOD	< LOD	< LOD	< LOD	< LOD	< LOD	< LOD	< LOD	< LOD	< LOD	< LOD	< LOD	< LOD	< LOD	< LOD	< LOD	< LOD	< LOD	< LOD	< LOD
Caffeic acid	HMDB0001964	1.25	5	10	< LOD	< LOD	4.32314	2.96296	-63.2026	-15.8006	43.2314	59.2592	2.40271e-06	< LOD	1.1245	3.55115	1.34806	2.66672	3.76529	< LOD	1.50305	0.704708	< LOD	< LOD	< LOD	< LOD	< LOD	< LOD	< LOD	< LOD	3.69803	< LOD	0.280835	< LOD	2.76522	< LOD	< LOD	< LOD	< LOD	1.25374	< LOD	< LOD	1.80094	< LOD	< LOD	< LOD	2.69531	< LOD	0.832139
Caproic acid	HMDB0000535	1.75	7	14	< LOD	9.49845	11.0977	8.25257	113.312	135.692	79.269	117.894	4.80366	6.52554	8.55178	7.14926	12.3481	23.1894	11.3804	16.6095	10.2054	9.74175	6.72302	8.40938	4.87815	9.82893	7.85758	7.71547	7.00655	13.5654	9.17776	20.1486	6.95669	6.68592	16.6009	6.18136	< LOD	4.86624	5.3902	9.65014	7.01412	8.23453	6.24859	11.7179	7.25914	10.4791	9.9739	7.29192	7.38107
Caprylic acid	HMDB0000482	0.875	3.5	7	0.823591	5.29764	5.74619	3.89292	94.1247	151.361	82.0884	111.226	0.0200881	0.60217	1.71743	1.32409	2.11239	4.38823	1.45711	1.66829	1.36159	1.36027	0.809534	0.670165	0.564058	1.26016	0.623543	0.52222	0.473238	1.91386	1.11172	3.82642	1.32234	1.0971	2.26629	0.744614	0.43829	0.612741	0.499692	0.618716	1.01989	1.36263	0.596108	2.10116	0.986035	1.70484	1.64126	0.903504	0.807562
cis-Aconitic acid	HMDB0000072	1.25	5	10	0.888174	5.61619	7.46824	6.21927	71.0539	112.324	74.6824	124.385	0.0946584	< LOD	0.113973	0.142664	0.191439	0.343657	< LOD	0.102873	0.167547	0.204402	0.154676	0.116481	0.175195	0.41919	0.200825	0.259932	0.191336	0.175969	0.179625	0.333914	0.352704	0.253706	0.466839	0.243668	0.167534	0.155084	0.273743	0.237458	0.250673	0.348894	0.288839	0.310856	0.240873	0.443547	0.265679	0.226775	0.175074
Citric acid	HMDB0000094	17.5	70	140	< LOD	93.5105	132.742	81.3762	70.4328	133.586	94.8155	116.252	18.6432	< LOD	< LOD	< LOD	< LOD	< LOD	< LOD	< LOD	< LOD	< LOD	< LOD	< LOD	< LOD	23.4442	< LOD	< LOD	< LOD	< LOD	< LOD	21.2326	24.0872	21.2955	19.6898	< LOD	< LOD	< LOD	< LOD	22.9088	< LOD	25.1851	19.6344	24.0071	18.6689	27.8933	18.8567	< LOD	< LOD
Cyclic AMP	HMDB0000058	1.28	5.12	10.24	1.55623	8.40552	10.5256	10.0382	121.58	164.17	102.789	196.059	0.111975	< LOD	< LOD	< LOD	< LOD	< LOD	< LOD	< LOD	< LOD	< LOD	< LOD	< LOD	< LOD	< LOD	< LOD	< LOD	< LOD	< LOD	< LOD	< LOD	< LOD	< LOD	< LOD	< LOD	< LOD	< LOD	< LOD	< LOD	< LOD	< LOD	< LOD	< LOD	< LOD	< LOD	< LOD	< LOD	< LOD
Dimethylglycine	HMDB0000092	4.375	17.5	35	5.07366	25.6718	29.143	21.9257	115.969	146.696	83.2657	125.29	4.71273e-05	< LOD	1.48259	1.82484	2.45548	3.58756	2.02022	2.42542	1.07881	1.24974	1.04673	0.717308	1.13921	1.92464	1.40785	1.53717	1.34319	2.30154	1.85868	4.03418	1.40151	1.24341	1.67241	1.06987	1.0722	1.12425	0.958482	1.20501	1.04935	1.54282	1.34335	1.96011	1.06818	1.74454	1.48791	0.681255	0.806954
Ethylmalonic acid	HMDB0000622	0.875	3.5	7	0.959991	4.86002	6.0931	3.84221	109.713	138.858	87.0442	109.777	0.0837193	< LOD	< LOD	< LOD	< LOD	0.119192	< LOD	< LOD	< LOD	< LOD	< LOD	< LOD	< LOD	< LOD	< LOD	< LOD	< LOD	< LOD	< LOD	< LOD	< LOD	< LOD	0.0842077	< LOD	< LOD	< LOD	< LOD	< LOD	< LOD	< LOD	< LOD	< LOD	< LOD	< LOD	< LOD	< LOD	< LOD
Fumaric acid	HMDB0000134	0.875	3.5	7	0.85572	4.09794	5.31244	2.95301	97.7965	117.084	75.8921	84.3718	0.104325	0.207069	0.403409	0.36258	0.946606	1.242	0.635797	0.777334	0.714244	0.916933	0.536772	0.712856	0.625679	0.881251	0.676423	0.64128	0.902415	1.01456	0.737606	2.29893	0.907889	0.784771	1.42212	0.616867	0.491861	0.791068	0.538985	0.847047	0.737806	0.860203	0.717394	1.35597	0.80925	1.0748	0.944032	0.90985	0.570435
Glutaric acid	HMDB0000661	0.5	2	4	0.572948	3.44379	3.54915	2.53212	114.59	172.189	88.7288	126.606	2.34968e-08	0.148498	0.147333	0.168689	0.190689	0.549323	0.166519	0.267704	0.138703	0.140362	0.307941	0.0815483	0.0881906	0.329114	0.0554106	0.109431	0.127294	0.15404	0.102253	0.342768	0.160223	0.187546	0.301661	0.142678	0.0434154	0.114407	0.0545591	0.200636	0.180595	0.134397	0.062636	0.205558	0.111992	0.120671	0.0793747	0.0465999	0.0366658
Glyceric acid	HMDB0000139	1.2	4.8	9.6	1.07976	6.28015	8.11232	4.91559	89.9799	130.836	84.5034	102.408	0.314164	1.3734	2.20706	1.7305	1.84108	4.82929	2.00174	2.45933	1.73305	1.94298	1.29037	1.38668	1.41718	2.36888	1.88835	1.78058	2.1674	2.67944	2.06386	3.52793	1.19667	1.83329	4.05268	1.36567	0.87751	1.47901	1.11877	3.09668	2.02355	1.69103	1.55788	2.53613	1.45359	1.94242	1.87613	1.41051	1.71488
Guanidinopropionic acid	HMDB0013222	7	28	56	6.70778	37.0447	48.9986	30.7819	95.8254	132.303	87.4975	109.935	0.0783297	< LOD	22.764	22.2281	28.1668	58.3856	24.4532	34.7511	16.8195	20.2321	16.7606	14.1426	14.8151	26.3407	18.8595	21.6019	24.3575	33.2768	25.0906	51.6659	21.1416	21.9509	27.5694	19.6504	14.4506	18.1762	17.6576	20.6901	19.9441	26.3002	19.0238	29.3879	20.5138	23.8309	20.4802	15.6872	18.6809
Guanidoacetic acid	HMDB0000128	3.5	14	28	3.2845	18.1625	22.8727	14.7424	93.8428	129.732	81.6884	105.303	0.185059	< LOD	0.335077	0.387546	0.51934	0.668725	0.374956	0.410031	0.439078	0.37849	0.261027	0.363692	0.344214	0.483278	0.325877	0.465389	0.365394	0.541018	0.476165	0.778662	0.368307	0.409133	0.494848	0.335024	0.285755	0.314461	0.324861	0.423675	0.391205	0.455641	0.365135	0.512474	0.456602	0.597457	0.361639	0.370722	0.291326
Hippuric acid	HMDB0000714	3.5	14	28	3.8102	20.0936	22.4289	15.3517	108.863	143.526	80.1033	109.655	0.281993	< LOD	1.20078	1.01242	1.26584	2.21159	0.987291	1.03908	0.731451	0.794251	0.572793	0.58065	0.736887	0.936288	0.819604	0.823443	0.968787	1.13816	0.955756	1.68468	0.775054	0.923038	1.27107	0.71099	0.588218	0.646891	0.605652	1.19147	0.860188	1.00107	0.753057	1.15688	0.933447	1.00688	0.892907	0.695721	0.862055
Homovanillic acid	HMDB0000118	0.1	0.4	0.8	< LOD	0.592763	1.3468	0.261497	-127.495	148.191	168.349	65.3742	0.00445246	< LOD	< LOD	< LOD	0.0290745	0.0321068	< LOD	< LOD	< LOD	< LOD	0.204449	0.0563026	< LOD	0.0184399	0.0344329	< LOD	< LOD	0.0554432	0.046868	< LOD	< LOD	< LOD	0.110512	< LOD	< LOD	< LOD	< LOD	< LOD	0.295776	< LOD	< LOD	0.00706487	< LOD	< LOD	0.135752	0.0165516	0.0130633
Indole-3-carboxylic acid	HMDB0003320	4.5	18	36	3.90515	25.8419	32.0963	16.2137	86.7812	143.566	89.1564	90.0759	0.279875	< LOD	< LOD	< LOD	< LOD	< LOD	< LOD	< LOD	< LOD	< LOD	< LOD	< LOD	< LOD	0.385119	< LOD	< LOD	< LOD	< LOD	< LOD	< LOD	< LOD	< LOD	< LOD	< LOD	< LOD	< LOD	< LOD	0.29467	< LOD	< LOD	< LOD	< LOD	0.28941	< LOD	< LOD	0.299272	< LOD
Indole-3-propionic acid	HMDB0002302	0.5	2	4	0.563306	2.72056	3.46002	2.39722	112.661	136.028	86.5005	119.861	0.0134553	< LOD	0.0592849	0.0484532	0.0712731	0.0874331	0.0474307	0.0559995	0.065205	0.0573712	0.048479	0.0497677	0.053838	0.0932133	0.072936	0.0797797	0.0821598	0.101188	0.0955903	0.164555	0.0893717	0.0771205	0.104555	0.0716738	0.0542011	0.0626498	0.0683319	0.108261	0.0796352	0.115886	0.0864795	0.141244	0.0852586	0.12141	0.09087	0.0786374	0.072423
Indolelactic acid	HMDB0000671	0.3375	1.35	2.7	0.474305	2.23278	2.28019	1.62901	140.535	165.391	84.4516	120.667	0.0832611	< LOD	0.124484	< LOD	0.231786	0.177093	0.129594	0.109748	0.0931438	< LOD	< LOD	0.085824	< LOD	< LOD	0.104541	0.144633	0.127763	0.182842	0.142035	0.237833	0.0943116	0.11859	0.157448	0.104373	< LOD	< LOD	0.143803	0.145721	0.0897579	0.117804	0.146631	0.163923	0.151468	0.127309	0.0881058	0.111779	0.13648
Indoxyl glucoside	HMDB0253456	6.4	25.6	51.2	7.39597	53.2659	60.7628	42.1418	115.562	208.07	118.677	164.616	3.64274	< LOD	< LOD	< LOD	< LOD	< LOD	< LOD	< LOD	< LOD	< LOD	< LOD	< LOD	< LOD	< LOD	< LOD	< LOD	< LOD	< LOD	< LOD	< LOD	< LOD	< LOD	< LOD	< LOD	< LOD	< LOD	< LOD	< LOD	< LOD	< LOD	< LOD	< LOD	< LOD	< LOD	< LOD	< LOD	< LOD
Indoxyl glucuronide	HMDB0010319	0.875	3.5	7	0.792486	4.73057	4.99109	3.24463	90.5698	135.159	71.3013	92.7036	1.98209e-06	< LOD	< LOD	0.091049	0.0921713	< LOD	0.080741	< LOD	< LOD	0.103722	0.0788261	0.0805307	0.0796473	< LOD	0.0800033	0.0810719	< LOD	0.0862718	0.0891238	0.0820588	0.0908523	0.0846893	< LOD	0.0924637	0.0820245	0.0825465	< LOD	0.0803881	0.0874931	0.0978553	0.0898988	< LOD	0.0862701	0.0921299	0.0861007	0.0840924	< LOD
Indoxyl sulfate	HMDB0000682	2.4	9.6	19.2	1.18748	14.879	18.8342	10.8429	49.4785	154.989	98.095	112.947	0.270133	< LOD	0.29958	< LOD	0.570777	0.441447	0.294614	0.343865	0.39603	< LOD	< LOD	0.28182	< LOD	0.443302	0.325694	< LOD	0.29887	0.32864	0.351687	0.319331	0.402737	0.415753	0.372125	0.355385	0.289595	0.338492	0.339599	0.550668	0.525094	0.911319	< LOD	0.419391	0.377456	0.370666	0.522635	0.517174	0.312444
Isocitric acid	HMDB0000193	1.25	5	10	0.900577	10.6627	8.74827	5.5141	72.0462	213.254	87.4827	110.282	0.206382	< LOD	< LOD	< LOD	0.261888	< LOD	< LOD	< LOD	< LOD	< LOD	< LOD	< LOD	0.350849	0.677945	0.47327	0.578925	0.28856	< LOD	0.244442	0.375035	0.689269	0.512799	0.207879	0.460134	0.288582	0.332239	0.397283	0.558785	0.521794	0.781563	0.612819	1.36655	0.734041	0.687099	0.47456	0.436687	0.400029
Isovaleric acid	HMDB0000718	4.2	16.8	33.6	< LOD	< LOD	< LOD	< LOD	76.9304	1.56171	26.405	120.84	63.8447	< LOD	< LOD	< LOD	< LOD	< LOD	< LOD	< LOD	< LOD	< LOD	< LOD	< LOD	< LOD	< LOD	< LOD	< LOD	< LOD	< LOD	< LOD	< LOD	< LOD	< LOD	< LOD	< LOD	< LOD	< LOD	< LOD	< LOD	< LOD	< LOD	< LOD	< LOD	< LOD	< LOD	< LOD	< LOD	< LOD
Kynurenic acid	HMDB0000715	0.5	2	4	0.427438	2.90372	3.67464	1.95839	85.4876	145.186	91.866	97.9195	1.9954e-07	< LOD	0.00334241	< LOD	0.0166576	0.00459882	0.00534516	0.00223095	0.0100024	0.00142176	< LOD	0.00258187	0.0159032	0.0190924	0.00769835	0.00829086	0.00547107	0.0102901	0.0108033	0.0149239	0.00212156	0.00692816	0.0177772	0.00100405	0.00914419	0.0118649	0.018045	0.00182886	0.00964176	0.00715701	0.0100917	0.00813344	0.0160151	0.00970155	0.0131715	0.0038586	0.0145911
Lactic acid	HMDB0000190	700	2800	5600	756.124	3735.02	4622.8	3238.84	108.018	133.393	82.55	115.673	27.5111	< LOD	677.749	682.309	1137.49	1782.32	862.038	957.2	593.307	604.579	412.018	493.616	551.432	816.898	581.524	677.813	782.42	1129.88	956.544	1574.36	679.745	739.895	950.03	562.549	429.645	483.149	503.633	814.997	649.571	809.612	604.061	1015.8	675.134	880.032	690.334	533.577	559.622
Maleic acid	HMDB0000176	0.875	3.5	7	1.15035	4.44217	7.02533	4.95077	131.469	126.919	100.362	141.451	3.84626e-07	0.0361455	0.146695	0.0948721	0.134756	0.355064	0.0859115	0.112334	0.138185	0.064683	0.121462	0.0342882	0.0494705	0.147432	0.0633131	0.0205281	0.019383	0.0958031	0.047054	0.192238	0.0788648	0.141796	0.200706	0.0532392	0.0548563	0.0697349	0.0384909	0.159548	0.239584	< LOD	0.0404579	0.108787	0.0278494	0.107636	0.0480445	0.0487754	0.0284315
Malic acid	HMDB0000156	3.5	14	28	2.94219	20.5494	25.5855	15.2453	84.0626	146.782	91.3767	108.895	0.438588	0.80384	1.26505	1.34148	2.35308	4.56125	1.42988	2.56144	4.64782	4.65693	2.92677	4.0584	3.85555	5.07492	3.72548	5.1759	4.01149	6.73049	4.58635	8.13644	4.67418	3.81141	5.36626	3.39532	2.1626	2.52085	3.4555	4.39233	4.84918	5.19255	3.14887	6.07716	3.93315	5.70833	4.57699	2.91546	3.39492
Malonic acid	HMDB0000691	0.75	3	6	< LOD	4.13808	4.61271	3.23149	101.447	137.936	76.8785	107.716	3.13454	< LOD	< LOD	< LOD	< LOD	< LOD	< LOD	< LOD	< LOD	< LOD	< LOD	< LOD	< LOD	< LOD	< LOD	< LOD	< LOD	< LOD	< LOD	< LOD	< LOD	< LOD	< LOD	< LOD	< LOD	< LOD	< LOD	< LOD	< LOD	< LOD	< LOD	< LOD	< LOD	< LOD	< LOD	< LOD	< LOD
Methylmalonic acid	HMDB0000202	0.45	1.8	3.6	0.545675	2.66152	2.82497	2.00882	121.261	147.862	78.4713	111.601	0.442881	< LOD	< LOD	< LOD	< LOD	0.468896	< LOD	< LOD	< LOD	< LOD	< LOD	< LOD	< LOD	< LOD	< LOD	< LOD	< LOD	< LOD	< LOD	< LOD	< LOD	< LOD	< LOD	< LOD	< LOD	< LOD	< LOD	< LOD	< LOD	< LOD	< LOD	< LOD	< LOD	< LOD	< LOD	< LOD	< LOD
N-Acetyl-Alanine	HMDB0000766	0.875	3.5	7	0.944438	4.25124	5.21791	3.74678	107.936	121.464	74.5416	107.051	0.101242	< LOD	0.372315	0.294511	0.289239	0.561271	0.280954	0.285676	0.257197	0.259934	0.194959	0.230579	0.227297	0.278566	0.247059	0.281648	0.36835	0.481062	0.303653	0.703682	0.2184	0.27632	0.385737	0.273046	0.206588	0.226824	0.169751	0.234186	0.24631	0.454139	0.379326	0.403711	0.26834	0.283369	0.273374	0.225359	0.18793
N-Acetyl-Arginine	HMDB0004620	3.5	14	28	3.7367	22.9143	25.4805	14.884	106.763	163.674	91.0019	106.315	9.34242e-07	0.138864	0.154744	0.211434	0.183645	0.279908	0.236812	0.166094	0.260287	0.260352	0.329953	0.172491	0.243531	0.104928	0.168312	0.203978	0.157776	0.253719	0.395784	0.282082	0.231864	0.155289	0.275685	0.174313	0.169521	0.152755	0.214212	0.465863	0.170977	0.345455	0.168556	0.399737	0.185278	0.387709	0.197443	0.182093	0.229534
N-Acetyl-Asparagine	HMDB0006028	0.5	2	4	0.42749	2.96208	3.27709	1.88376	85.4981	148.104	81.9272	94.1879	0.0447788	< LOD	< LOD	< LOD	0.0648941	0.0458765	0.0532564	0.0466298	0.0488322	< LOD	< LOD	0.0524686	< LOD	< LOD	0.0517702	0.0508996	0.0597879	0.0463141	0.0612998	< LOD	0.0540119	0.0517486	0.0763787	0.0541011	< LOD	< LOD	< LOD	< LOD	0.0584399	< LOD	0.0473943	0.0510346	< LOD	0.045609	< LOD	< LOD	0.054123
N-Acetyl-Aspartic acid	HMDB0000812	0.5	2	4	0.600873	2.2079	6.52205	3.68976	120.175	110.395	163.051	184.488	0.106934	< LOD	0.134331	< LOD	0.136435	0.240025	< LOD	0.321459	0.110479	0.122224	< LOD	0.238768	0.12197	0.128501	0.133229	< LOD	0.252805	0.154911	< LOD	0.267057	0.164962	0.328428	0.159619	0.150693	0.128678	0.157031	< LOD	0.175074	0.126776	0.124544	< LOD	0.166198	0.139548	< LOD	0.249054	0.109637	< LOD
N-Acetyl-Glutamic acid	HMDB0001138	0.5625	2.25	4.5	0.748809	3.04453	3.96096	2.88449	133.122	135.313	88.0212	128.2	1.66542e-07	< LOD	0.0256894	< LOD	0.0260355	0.0225049	0.0201397	0.0497422	0.033039	0.0281108	0.0223802	0.0247307	0.0255688	0.0247743	0.0311636	0.0308832	0.0305857	0.0304042	0.0240553	0.0474074	0.038489	0.0367198	0.0570661	0.0199939	0.024139	0.0232328	0.0229868	0.0354753	0.0216723	0.0597671	0.0224524	0.0301703	0.035173	0.047157	0.0305998	0.021544	0.0203038
N-Acetyl-Glutamine	HMDB0006029	4	16	32	5.74307	20.8754	30.7292	16.4886	143.577	130.472	96.0288	103.054	0.00252202	0.216398	0.307684	0.224315	0.277874	0.478419	0.323447	0.211655	0.246005	0.373456	0.190291	0.254663	0.189885	0.228003	0.259553	0.271707	0.245498	0.343091	0.239173	0.318763	0.25595	0.224822	0.455208	0.265329	0.263677	0.231356	0.266936	0.290115	0.285887	0.350756	0.319101	0.265996	0.246641	0.20448	0.234598	0.3178	0.274913
N-Acetyl-Glycine	HMDB0000532	3.5	14	28	3.48493	18.8475	24.3308	16.3665	99.5695	134.625	86.8957	116.904	0.175081	< LOD	0.330512	0.296284	0.393305	0.588586	0.311575	0.441941	0.281579	0.257044	0.232705	0.226117	0.231685	0.373535	0.297533	0.325757	0.314434	0.500264	0.43577	0.617324	0.324419	0.323337	0.427736	0.25147	0.209993	0.250108	0.254272	0.338851	0.331439	0.372137	0.290286	0.353698	0.270693	0.376434	0.32693	0.289255	0.231424
N-Acetyl-Histidine	HMDB0032055	17.5	70	140	21.3548	97.0865	119.705	89.3012	122.027	138.695	85.5038	127.573	0.4921	< LOD	4.7847	5.03813	6.17833	9.43381	6.07483	6.55529	4.60875	4.35816	2.82736	4.2136	3.534	4.9861	4.10456	5.22731	4.35811	6.09701	6.28361	10.4978	4.85146	6.18148	6.54095	3.01481	4.00506	2.63147	5.25449	5.29084	4.68461	5.51897	4.02636	7.63642	4.87161	5.71024	4.50616	3.01314	3.45729
N-Acetyl-Isoleucine	HMDB0061684	0.875	3.5	7	0.843076	5.46176	9.55371	3.58737	96.3515	156.05	136.482	102.496	0.0790966	< LOD	< LOD	< LOD	< LOD	< LOD	< LOD	0.1203	< LOD	< LOD	0.0817757	< LOD	< LOD	< LOD	< LOD	0.0811507	< LOD	< LOD	< LOD	< LOD	< LOD	< LOD	< LOD	< LOD	< LOD	< LOD	< LOD	< LOD	< LOD	< LOD	< LOD	0.0819778	0.0888787	< LOD	< LOD	< LOD	< LOD
N-Acetyl-Leucine	HMDB0011756	0.875	3.5	7	0.567873	4.0228	2.55681	2.39607	64.8998	114.937	36.5258	68.4592	0.0669478	< LOD	< LOD	< LOD	< LOD	< LOD	< LOD	< LOD	< LOD	< LOD	< LOD	< LOD	< LOD	< LOD	< LOD	< LOD	< LOD	< LOD	< LOD	0.0955887	< LOD	< LOD	< LOD	< LOD	< LOD	< LOD	< LOD	< LOD	< LOD	< LOD	< LOD	< LOD	< LOD	< LOD	< LOD	< LOD	< LOD
N-Acetyl-Methionine	HMDB0011745	0.875	3.5	7	0.0569037	5.36352	5.96827	3.55399	6.50328	153.243	85.2609	101.543	0.000265894	< LOD	< LOD	< LOD	< LOD	< LOD	< LOD	< LOD	< LOD	< LOD	< LOD	< LOD	< LOD	< LOD	< LOD	< LOD	< LOD	< LOD	< LOD	< LOD	< LOD	< LOD	< LOD	< LOD	< LOD	< LOD	< LOD	< LOD	< LOD	< LOD	< LOD	< LOD	< LOD	< LOD	< LOD	< LOD	< LOD
N-Acetyl-Proline	HMDB0094701	0.5625	2.25	4.5	0.633796	3.24338	3.59025	2.52614	112.675	144.15	79.7834	112.273	0.00461562	< LOD	0.0303864	0.0272072	0.0597868	0.0724522	0.0362232	0.0335141	0.0255772	0.031944	0.0154939	0.0345565	0.0235249	0.0323532	0.0319102	0.0339012	0.0324728	0.0704337	0.0304587	0.0738722	0.0220565	0.0404592	0.0514853	0.0273374	0.0194635	0.034255	0.0154947	0.0373504	0.0287015	0.0365283	0.024896	0.0460029	0.0272626	0.0393653	0.024831	0.0100559	0.0171304
N-Acetyl-Serine	HMDB0002931	0.875	3.5	7	1.05176	5.53583	6.34796	3.7195	120.201	158.167	90.6852	106.272	1.96773e-07	< LOD	0.142904	0.180482	0.251428	0.285499	0.200601	0.201871	0.0900559	0.12739	0.118369	0.0920959	0.0827706	0.146991	0.127516	0.126369	0.124937	0.213453	0.148968	0.383544	0.143755	0.158627	0.249194	0.149233	0.072749	0.0894979	0.0898778	0.140485	0.158075	0.21222	0.14037	0.209762	0.103607	0.256749	0.173595	0.151677	0.146183
N-Acetyl-Tryptophan	HMDB0013713	0.875	3.5	7	< LOD	10.3854	< LOD	< LOD	145.135	296.726	63.9016	115.794	4.83722	< LOD	< LOD	< LOD	< LOD	< LOD	< LOD	< LOD	< LOD	< LOD	< LOD	< LOD	5.16245	< LOD	< LOD	< LOD	4.86557	< LOD	< LOD	8.56816	< LOD	< LOD	< LOD	< LOD	< LOD	< LOD	< LOD	< LOD	< LOD	< LOD	< LOD	< LOD	< LOD	< LOD	< LOD	< LOD	< LOD
N-Acetyl-Tyrosine	HMDB0000866	0.5625	2.25	4.5	0.852691	3.56794	3.75841	2.57494	151.589	158.575	83.5202	114.442	0.0935293	< LOD	< LOD	< LOD	< LOD	< LOD	< LOD	0.156597	< LOD	< LOD	< LOD	< LOD	< LOD	< LOD	< LOD	< LOD	< LOD	< LOD	< LOD	< LOD	< LOD	< LOD	< LOD	< LOD	< LOD	< LOD	< LOD	< LOD	< LOD	< LOD	< LOD	< LOD	< LOD	< LOD	< LOD	< LOD	< LOD
N-Acetyl-Valine	HMDB0011757	0.5625	2.25	4.5	0.528643	3.29241	4.271	2.41566	93.981	146.329	94.911	107.363	0.0632246	< LOD	< LOD	< LOD	< LOD	0.109713	< LOD	< LOD	< LOD	< LOD	< LOD	< LOD	< LOD	< LOD	< LOD	< LOD	< LOD	< LOD	< LOD	< LOD	< LOD	< LOD	< LOD	< LOD	< LOD	< LOD	< LOD	< LOD	< LOD	< LOD	< LOD	< LOD	< LOD	< LOD	< LOD	< LOD	< LOD
N-Methyl-Aspartic acid	HMDB0002393	8.75	35	70	7.4299	41.3442	50.355	38.8621	84.9131	118.126	71.9357	111.035	4.02022	< LOD	< LOD	< LOD	< LOD	4.15365	< LOD	< LOD	< LOD	< LOD	< LOD	< LOD	< LOD	< LOD	< LOD	< LOD	< LOD	< LOD	< LOD	< LOD	< LOD	< LOD	< LOD	< LOD	< LOD	< LOD	< LOD	< LOD	< LOD	< LOD	< LOD	< LOD	< LOD	< LOD	< LOD	< LOD	< LOD
N1-Acetyl-Lysine	HMDB0000446	3.5	14	28	4.36251	19.3973	23.6748	15.723	124.643	138.552	84.5528	112.307	1.17602e-06	< LOD	0.142612	0.151292	0.206026	0.186843	0.162445	< LOD	0.140902	0.133333	0.13527	0.138949	< LOD	< LOD	0.15516	< LOD	0.150395	0.193074	0.13383	< LOD	0.157598	0.150174	0.198355	0.130193	0.135138	0.146678	0.121862	0.134911	0.154631	0.145486	0.135964	0.132619	0.155789	0.159573	0.131586	0.154868	0.144016
N1-Acetyl-Lysine + N6-Acetyl-Lysine	HMDB0000446 HMDB0000206	7	28	56	8.76041	38.6346	38.2948	29.3554	125.149	137.981	68.3835	104.841	0.734784	< LOD	< LOD	< LOD	< LOD	< LOD	< LOD	< LOD	< LOD	< LOD	< LOD	< LOD	< LOD	< LOD	< LOD	< LOD	< LOD	< LOD	< LOD	< LOD	< LOD	< LOD	< LOD	< LOD	< LOD	< LOD	< LOD	< LOD	< LOD	< LOD	< LOD	< LOD	< LOD	< LOD	< LOD	< LOD	< LOD
Orotic acid	HMDB0000226	2.25	9	18	0.441928	8.1774	11.9299	6.47284	19.6412	90.86	66.277	71.9205	0.00448031	< LOD	< LOD	< LOD	< LOD	< LOD	< LOD	< LOD	< LOD	< LOD	< LOD	< LOD	< LOD	< LOD	< LOD	< LOD	< LOD	< LOD	< LOD	< LOD	< LOD	< LOD	< LOD	< LOD	< LOD	< LOD	< LOD	< LOD	< LOD	< LOD	< LOD	< LOD	< LOD	< LOD	< LOD	< LOD	< LOD
p-Cresol sulfate	HMDB0011635	128	512	1024	24.5634	651.388	897.346	578.219	19.1902	127.224	87.6315	112.933	10.2877	< LOD	10.3851	10.3171	10.3731	10.5759	10.3925	10.5357	10.3149	< LOD	< LOD	10.3069	10.3639	10.3706	10.3403	10.3867	10.4171	10.3613	10.4263	10.5151	10.3886	10.3695	10.5058	10.3127	10.3169	< LOD	< LOD	10.3231	10.3999	10.5056	10.3223	10.3789	< LOD	10.5406	10.3464	10.2962	10.3783
p-Hydroxyhippuric acid	HMDB0013678	0.8	3.2	6.4	1.13353	5.56689	6.00219	4.32015	141.691	173.965	93.7842	135.005	2.21541e-07	< LOD	< LOD	0.0297464	0.0053951	0.0465388	< LOD	< LOD	< LOD	< LOD	< LOD	< LOD	< LOD	< LOD	< LOD	< LOD	< LOD	< LOD	< LOD	0.0211235	< LOD	< LOD	< LOD	< LOD	< LOD	< LOD	< LOD	< LOD	< LOD	< LOD	< LOD	0.0196006	< LOD	< LOD	0.0088073	0.00805883	< LOD
Phenylacetic acid	HMDB0000209	1.25	5	10	1.45235	7.75621	10.7898	5.85177	116.188	155.124	107.898	117.035	0.000726682	0.011118	0.0285424	0.00805621	0.0188944	0.143859	0.0288309	0.0439463	0.0211007	0.0054265	< LOD	0.00241072	0.0154493	0.0146253	0.0186351	0.0191203	0.0367263	0.0430055	0.0204732	0.0546691	0.0430171	0.0117538	0.0447859	0.0166605	< LOD	0.0131419	0.0197317	0.0244022	0.0315222	0.0502668	0.016321	0.0453173	0.0188871	0.0261325	0.0296301	0.0103858	0.0160316
Phenylacetylglutamine	HMDB0006344	0.5	2	4	0.648648	2.46702	7.68713	1.82154	129.73	123.351	192.178	91.0768	1.70304e-06	< LOD	0.19504	0.101246	0.137875	0.535652	0.188271	0.102338	0.0872362	0.57355	0.109474	0.125379	0.0819501	0.225704	0.160929	0.334947	0.205891	0.11822	0.142303	0.153459	0.199328	0.182262	0.155349	0.215076	0.0536579	0.0561147	0.117061	0.137887	0.0693812	0.403074	0.258944	0.252829	0.184248	0.312776	0.115321	0.0926488	0.148128
Picolinic acid	HMDB0002243	4.2	16.8	33.6	4.47178	23.064	25.8907	17.5302	106.471	137.286	77.0555	104.346	0.124299	< LOD	< LOD	< LOD	< LOD	0.13572	< LOD	< LOD	< LOD	< LOD	< LOD	< LOD	< LOD	< LOD	< LOD	< LOD	< LOD	< LOD	< LOD	< LOD	< LOD	< LOD	< LOD	< LOD	< LOD	< LOD	< LOD	< LOD	< LOD	< LOD	< LOD	< LOD	< LOD	< LOD	< LOD	< LOD	< LOD
Pipecolic acid	HMDB0000070	1.28	5.12	10.24	1.51049	7.0865	8.30059	5.15477	118.007	138.408	81.0604	100.679	0.000122534	0.0274469	2.14967	2.97873	5.1928	6.3533	2.92119	3.70581	3.1252	3.06502	2.36068	2.53015	2.37225	4.41573	2.99765	3.86774	3.34863	4.99654	3.64939	7.19327	4.1086	4.31473	5.14315	3.21594	2.30563	2.90357	3.02869	3.93515	4.03035	5.6908	3.50957	5.28113	3.40976	4.48678	3.43604	3.04478	2.96128
Propionic acid	HMDB0000237	0.875	3.5	7	3.29126	10.513	7.80726	10.513	376.143	300.372	111.532	300.372	0.000611096	10.513	3.64105	10.513	10.513	10.513	10.513	10.513	2.5141	10.513	2.02562	2.4114	2.80145	10.513	3.51591	5.66012	8.25927	10.513	4.29711	10.513	10.513	10.513	10.513	4.08343	7.0558	4.18957	2.89625	10.513	10.513	10.513	10.513	10.513	5.06604	10.513	9.88183	4.45438	10.513
Pyruvic acid	HMDB0000243	17.5	70	140	16.4507	103.963	110.409	71.2614	94.004	148.518	78.8638	101.802	0.0408496	3.32325	10.709	19.0698	24.9747	37.9892	14.3366	29.9792	10.6533	18.1023	8.53386	5.93958	12.1489	18.946	10.3905	15.6789	13.6817	18.6591	19.7442	44.6292	32.5765	23.6055	25.8235	12.8203	8.07867	12.8611	13.4923	17.9072	17.6854	21.2033	15.885	25.2813	15.6704	29.3306	13.3189	15.3905	10.5557
Quinaldic acid	HMDB0000842	3.5	14	28	4.01693	16.6687	24.2134	11.9159	114.77	119.062	86.4764	85.1139	0.202567	< LOD	< LOD	< LOD	< LOD	< LOD	< LOD	< LOD	< LOD	< LOD	< LOD	< LOD	< LOD	< LOD	< LOD	< LOD	< LOD	< LOD	< LOD	< LOD	< LOD	< LOD	< LOD	< LOD	< LOD	< LOD	< LOD	< LOD	< LOD	< LOD	< LOD	< LOD	< LOD	< LOD	< LOD	< LOD	< LOD
Quinoline-4-carboxylic acid	HMDB0257047	1.75	7	14	1.77901	10.5292	11.7015	7.91688	101.658	150.417	83.5824	113.098	0.00256942	< LOD	< LOD	< LOD	< LOD	< LOD	< LOD	< LOD	< LOD	< LOD	< LOD	< LOD	< LOD	< LOD	< LOD	< LOD	< LOD	< LOD	< LOD	< LOD	< LOD	< LOD	< LOD	< LOD	< LOD	< LOD	< LOD	< LOD	< LOD	< LOD	< LOD	< LOD	< LOD	< LOD	< LOD	< LOD	< LOD
Quinolinic acid	HMDB0000232	0.5	2	4	0.561323	3.39689	4.17097	1.82618	112.265	169.844	104.274	91.3089	0.0151213	< LOD	< LOD	< LOD	0.0255591	0.0345723	< LOD	< LOD	0.0242004	0.0245034	0.022553	0.028388	0.0238308	0.0475521	0.0249361	0.024047	0.0234779	0.0442122	0.0486069	0.0568763	0.0601488	0.0590271	0.027576	0.0304577	< LOD	0.0159264	0.0230325	0.0265344	0.0336552	0.0351243	< LOD	0.0531047	0.0365421	0.0408417	0.0271969	0.0273516	0.024235
Salicylic acid	HMDB0001895	3.5	14	28	3.82854	28.453	25.5807	15.2147	109.387	203.236	91.3598	108.677	0.187816	0.226831	< LOD	< LOD	0.329995	< LOD	< LOD	< LOD	< LOD	< LOD	< LOD	< LOD	< LOD	< LOD	< LOD	< LOD	< LOD	< LOD	< LOD	< LOD	< LOD	< LOD	< LOD	< LOD	< LOD	< LOD	< LOD	< LOD	< LOD	< LOD	< LOD	< LOD	< LOD	< LOD	< LOD	< LOD	< LOD
Shikimic acid	HMDB0003070	1.6	6.4	12.8	0	0	0	0	0	0	0	0	0	0	0	0	0	0	0	0	0	0	0	0	0	0	0	0	0	0	0	0	0	0	0	0	0	0	0	0	0	0	0	0	0	0	0	0	0
Succinic acid	HMDB0000254	7	28	56	6.97742	38.671	46.5687	28.442	99.6774	138.111	83.1584	101.578	3.37961	< LOD	< LOD	< LOD	< LOD	< LOD	< LOD	< LOD	< LOD	< LOD	< LOD	< LOD	< LOD	< LOD	< LOD	< LOD	< LOD	< LOD	< LOD	< LOD	< LOD	< LOD	< LOD	< LOD	< LOD	< LOD	< LOD	< LOD	< LOD	< LOD	< LOD	< LOD	< LOD	< LOD	< LOD	< LOD	< LOD
Tartaric acid	HMDB0000956	0.45	1.8	3.6	0.588818	3.4141	3.55115	2.40414	130.848	189.672	98.643	133.563	4.2803e-07	0.0620734	0.0265675	< LOD	0.0692508	0.017283	0.055788	0.0330479	0.270438	0.283698	0.224768	0.29257	0.223274	0.443947	0.232284	0.217764	0.227458	0.288598	0.0918298	0.538348	0.251936	0.242504	0.487349	0.145875	0.103861	0.108043	0.246738	0.306683	0.625775	0.19511	0.236409	0.198007	0.331174	0.396395	0.210513	0.195277	0.125323
Threonic acid	HMDB0000943	8.4	33.6	67.2	7.92916	47.1299	62.3472	36.2249	94.3948	140.268	92.7785	107.812	1.22558e-05	0.155467	0.828236	1.42124	2.54148	3.65447	2.08113	2.20282	1.71177	2.50384	1.13495	1.26218	1.33163	2.79627	2.9642	2.5604	3.72454	3.87382	2.79508	5.93306	2.52167	2.9453	5.81308	2.7155	1.42206	2.50063	2.30718	3.47709	2.85282	2.27587	2.37759	3.57618	2.24591	2.92425	2.30131	1.67426	1.70416
Tiglylglycine	HMDB0000959	0.8	3.2	6.4	0.839925	4.12331	5.32412	3.62375	104.991	128.854	83.1894	113.242	0.0509794	< LOD	< LOD	< LOD	< LOD	< LOD	< LOD	< LOD	< LOD	< LOD	< LOD	< LOD	< LOD	< LOD	< LOD	< LOD	< LOD	< LOD	< LOD	0.0659978	< LOD	< LOD	< LOD	< LOD	< LOD	< LOD	< LOD	< LOD	< LOD	< LOD	< LOD	< LOD	< LOD	< LOD	< LOD	< LOD	< LOD
Uric acid	HMDB0000289	125	500	1000	150.023	741.887	869.381	634.351	120.018	148.377	86.9381	126.87	18.6469	< LOD	< LOD	< LOD	< LOD	24.1544	< LOD	< LOD	26.9152	24.7102	22.9128	23.0247	27.6943	35.4998	31.2552	35.2671	31.5515	33.8166	31.8065	45.8469	32.9624	34.1979	29.0795	35.5255	23.0549	25.7037	33.0947	40.364	40.9978	51.5639	45.0897	61.1131	45.497	58.2989	40.3478	32.9239	33.0289
Valeric acid	HMDB0000892	0.875	3.5	7	< LOD	< LOD	< LOD	< LOD	79.4222	118.407	65.199	142.941	16.0646	< LOD	< LOD	< LOD	< LOD	< LOD	< LOD	< LOD	< LOD	< LOD	< LOD	< LOD	< LOD	< LOD	< LOD	< LOD	< LOD	< LOD	< LOD	< LOD	< LOD	< LOD	< LOD	< LOD	< LOD	< LOD	< LOD	< LOD	< LOD	< LOD	< LOD	< LOD	< LOD	< LOD	< LOD	< LOD	< LOD
Xanthine	HMDB0000292	3.2	12.8	25.6	3.95912	17.3345	20.927	15.1928	123.722	135.425	81.746	118.694	0.299701	< LOD	< LOD	< LOD	< LOD	0.339046	< LOD	0.433752	< LOD	< LOD	< LOD	< LOD	< LOD	< LOD	< LOD	< LOD	0.353776	< LOD	0.382694	0.409007	< LOD	0.397284	< LOD	0.31531	< LOD	< LOD	< LOD	0.40671	< LOD	0.348186	< LOD	0.504295	< LOD	< LOD	0.346498	0.306695	0.335752
Xanthosine	HMDB0000299	3.2	12.8	25.6	3.25095	5.28423	21.0884	4.98094	101.592	41.283	82.3766	38.9136	0.132727	0.233993	0.226248	0.238405	< LOD	0.348402	0.226837	0.239329	0.227291	< LOD	0.227571	0.232246	0.235659	0.229636	0.227508	0.224139	0.238537	0.237159	0.232406	< LOD	< LOD	0.22414	0.227006	0.224556	0.221083	0.22275	0.219797	0.246213	0.225117	0.262682	0.221851	0.238932	0.229001	0.240651	0.248872	0.264187	0.269164
[truncated: 15 more columns]
